# Supplementary material for: Acute effects of lower trapezius activation exercises on shoulder muscle activation during overhead functional tasks in symptomatic and asymptomatic adults
Source: PeerJ journal article supplement (doi:10.7717/peerj.19861), 2025-08-06
Supplement: RawPxDataforPeerJ.xlsx [file RawPxDataforPeerJ.xlsx]

## Sheet: Lower Trapezius Differences
COMB	C = CONTROL		P = PAIN		R = RIGHT		L = LEFT																											Overhead Reach
% Motion	C02R	C03R	C04R	C06R	C07R	C10R	C12R	C18R	C21R	C02L	C03L	C04L	C06L	C07L	C10L	C12L	C18L	C21L	P01R	P04R	P05R	P06R	P07R	P08R	P09R	P01L	P02L	P03L	P04L	P05L	P06L	P07L	P09L	% Motion	C02R	C03R	C04R	C06R	C07R	C10R	C12R	C18R	C21R	C02L	C03L	C04L	C06L	C07L	C10L
1	-2.72209	-0.602507	-0.894474	-0.677346	-0.268842	-0.696532	-3.53042	4.24312	-1.93516	-0.613159	-0.880754	-1.20012	1.62396	0.30745	-0.76423	-1.97492	-2.19122	-1.69601	4.87803	0.289917	-0.6099	3.34716	-0.445048	0.0401595	0.431859	-0.238585	-0.155352	-0.165314	-2.45184	0.132026	4.64661	0.156776	16.3528	1	-10.1806	1.31494	-0.777829	8.31282	-5.217	-1.37376	-11.7306	-0.486173	0.972399	-1.92198	-2.92237	-3.6804	1.31184	-3.43014	-3.26094
2	-2.71348	-0.78047	-0.778752	-1.02361	-0.380043	-0.708517	-4.16266	4.31463	-1.34647	-0.713746	-0.901048	-1.1706	1.6747	0.231646	-1.27233	-1.962	-2.10433	-1.51968	4.77394	0.108112	-0.606126	2.77367	-0.437366	0.0109789	-0.947548	-0.368071	-0.0343366	-0.149996	-3.1221	0.215774	4.6428	-0.26212	14.2741	2	-11.0107	0.792085	-1.55106	7.56791	-5.81589	-1.03756	-10.9837	-0.79505	1.79656	-1.78899	-3.21314	-3.33126	1.06736	-2.61127	-2.81291
3	-2.58313	-0.993913	-0.660138	-1.3881	-0.635964	-0.62198	-4.40716	4.25042	-0.687296	-0.901917	-0.886098	-1.18769	1.62232	0.140458	-1.69364	-1.78058	-1.98087	-1.57687	4.41461	0.0801648	-0.593123	2.78709	-0.469139	-0.00638613	-2.21477	-0.483897	0.189856	-0.133001	-3.4898	0.268338	4.54376	-0.940814	12.3164	3	-12.3476	0.351071	-3.00085	6.54235	-6.46047	-0.572862	-9.31877	-1.20888	2.90589	-1.99104	-3.21611	-2.98565	0.844283	-1.49779	-2.21998
4	-2.49605	-1.2534	-0.586788	-1.66516	-1.03248	-0.469041	-4.60725	4.15634	-0.216705	-1.72759	-0.772468	-1.13152	1.45931	0.0576794	-1.97692	-1.61966	-1.8113	-1.74174	3.69654	-0.140209	-0.579873	2.1949	-0.43168	0.000676586	-3.2305	-0.618849	0.196973	-0.111245	-3.88348	0.291041	4.09672	-1.3788	10.2519	4	-14.454	0.073474	-4.59065	5.95618	-6.79769	0.0248027	-7.13789	-1.65141	3.44958	-1.64637	-3.2884	-2.57044	0.47197	-0.498059	-1.49368
5	-2.63061	-1.46549	-0.486821	-1.48708	-1.54851	-0.303499	-4.70657	3.9409	0.287636	-3.0957	-0.538187	-1.02862	1.30474	-0.0741513	-2.16152	-1.53544	-1.58088	-1.75074	2.9163	-0.475997	-0.537316	2.0826	-0.309396	0.0261399	-3.94273	-0.612758	-0.0750322	-0.0983402	-3.92399	0.291627	3.98796	-1.46197	8.08615	5	-16.3253	-0.134476	-5.38283	5.10092	-6.91852	0.586173	-4.95208	-1.67675	3.32563	-1.04549	-2.98774	-2.02222	0.0940136	0.19893	-0.815632
6	-2.95279	-1.61468	-0.373738	-0.985779	-2.25828	-0.182316	-4.87564	3.47929	0.404261	-4.06437	-0.276234	-0.931858	1.10757	-0.124791	-2.16888	-1.57626	-1.22937	-1.61734	1.0257	-0.494317	-0.430435	1.9486	-0.169986	0.0521758	-4.15899	-0.501855	-0.282376	-0.0817041	-3.65647	0.200557	3.37605	-1.10473	6.11431	6	-17.1446	-0.340715	-5.63062	4.73825	-6.67485	0.982047	-3.36139	-1.40473	2.60243	-0.0689184	-2.27991	-1.36464	0.0126489	0.998648	-0.339157
7	-3.59472	-1.96245	-0.358904	-0.270264	-3.05108	-0.289629	-5.08163	2.77511	0.0690112	-4.34175	-0.0663726	-0.740358	0.86267	-0.0843413	-2.08592	-1.77818	-0.835161	-1.75299	-2.13646	-0.430872	-0.168622	1.80776	-0.0210225	0.0740687	-4.73988	-0.454307	-0.326546	-0.0962056	-3.28937	0.0518256	2.79442	-0.775353	4.62899	7	-17.1383	-0.612741	-5.17636	4.71621	-6.08435	1.16444	-2.15324	-0.969318	1.8628	0.191463	-1.49982	-0.731905	0.0968764	1.62462	-0.0449039
8	-4.0051	-2.41911	-0.340186	0.525175	-3.58147	-0.555822	-4.91425	1.80048	-0.0276753	-4.44588	0.14315	-0.53553	0.671709	-0.0421893	-2.01756	-2.01724	-0.472327	-2.10929	-4.80441	-0.291243	0.141535	2.11991	0.219736	0.0878522	-4.3697	-0.422879	-0.251071	-0.0939188	-2.82624	-0.132006	2.4276	-0.421171	3.32465	8	-16.6471	-0.944031	-4.17125	4.68246	-5.27586	1.29426	-1.26868	-0.316337	1.44318	-0.670262	-0.936878	-0.0511061	0.202037	1.85154	0.148169
9	-4.42927	-2.95819	-0.310963	1.20294	-3.69843	-0.899678	-4.41001	0.495851	0.330765	-4.13616	0.322758	-0.408783	0.471743	-0.0195621	-1.80541	-2.33411	-0.213655	-2.01674	-6.30806	-0.167974	0.404702	3.35651	0.477408	0.0816902	-3.23872	-0.425593	0.00860784	-0.0631293	-2.19286	-0.339342	1.75707	0.355517	2.06476	9	-15.9703	-1.16804	-2.92272	4.6287	-4.21539	1.32111	0.431596	0.176202	1.41164	-1.53903	-0.61404	0.685723	0.308754	1.75468	0.139858
10	-5.64259	-3.38979	-0.319137	1.79653	-3.57067	-1.17422	-4.0262	-0.948949	0.585992	-3.85815	0.420082	-0.294919	0.367007	-0.117838	-1.63567	-2.70482	-0.075894	-1.83333	-7.03228	-0.021569	0.792158	5.15691	0.701371	0.0839174	-2.1699	-0.535874	0.0521941	-0.0210382	-1.37134	-0.517227	0.979474	1.57512	0.619861	10	-15.1891	-1.25657	-1.93857	4.75544	-3.23956	1.30524	1.53415	0.708045	1.06762	-3.33008	-0.670261	1.32959	0.146124	1.53566	0.46499
11	-6.78101	-3.61257	-0.22316	2.12748	-3.46358	-1.34555	-3.97218	-2.29019	0.793634	-3.68681	0.49782	-0.210957	0.418793	-0.229091	-1.36344	-2.73107	-0.0534492	-1.59398	-7.5275	0.423254	1.3926	5.8207	0.690755	0.105074	-0.962584	-0.706026	0.0963153	0.0376331	-0.733533	-0.639263	0.705301	2.99166	-0.453956	11	-14.8721	-1.30554	-0.610467	4.92024	-2.24043	1.21822	2.89541	1.45821	0.477245	-6.27264	-0.789838	1.8653	0.0765233	1.10193	0.426407
12	-7.36941	-3.66381	-0.0921817	2.34149	-3.21228	-1.50249	-3.52172	-3.38907	1.06617	-3.33524	0.505404	-0.194623	0.368579	-0.303675	-1.08773	-2.46635	-0.140305	-1.30087	-7.93502	0.999509	2.16541	6.41263	0.520052	0.189108	0.143205	-0.817548	0.302219	0.0975178	-0.31306	-0.762633	0.613109	4.29054	-0.983066	12	-14.2266	-1.19487	0.523153	4.60846	-1.28103	1.17526	4.24628	2.16089	0.020925	-9.21835	-0.904758	2.33093	0.0553058	0.547755	0.111146
13	-7.91828	-3.57775	0.00842099	2.56267	-2.80775	-1.70625	-3.07577	-4.28343	1.22348	-2.68755	0.477501	-0.171576	0.245775	-0.367291	-0.724946	-2.11522	-0.338276	-1.17905	-7.62759	1.57017	2.99925	8.80752	0.389344	0.324545	1.25468	-0.722803	0.161964	0.167533	0.26918	-0.88658	0.312542	5.0908	-1.01484	13	-13.5647	-1.03037	1.82358	4.35409	-0.847251	1.043	5.08027	2.44788	-0.284074	-11.5484	-1.21724	2.64596	0.0587908	-0.171634	0.0182214
14	-8.48955	-3.36266	0.160995	1.9278	-2.33515	-1.88923	-3.1612	-4.98703	1.10375	-1.6852	0.478461	-0.0982453	-0.0676707	-0.425914	-0.416419	-1.83758	-0.607406	-1.03611	-6.44987	1.98573	3.84609	9.37648	0.253252	0.438209	2.45986	-0.506032	0.247949	0.198693	0.371448	-0.933643	0.0796768	5.2639	-0.841993	14	-13.8782	-0.99447	2.78706	3.75884	-0.402801	0.847849	5.87939	2.60562	-0.541471	-13.9326	-1.66392	2.94242	0.0456709	-1.00252	0.183195
15	-9.19733	-3.10148	0.365707	0.964425	-1.96626	-2.12882	-3.14077	-5.53447	1.07235	-0.465886	0.47163	0.00154284	-0.340992	-0.458	0.0793172	-1.74318	-0.888506	-0.763118	-5.68325	2.47456	4.70956	8.52151	0.167869	0.53936	3.5638	-0.166674	0.569785	0.187231	0.22241	-1.01211	0.347878	5.63314	-0.758501	15	-14.0018	-0.91335	3.11062	3.42108	0.0396259	0.634658	6.18957	2.36349	-0.943179	-15.4997	-2.17074	3.24776	-0.192059	-1.7353	0.433959
16	-9.46305	-2.85832	0.559957	0.561448	-1.76735	-2.25425	-3.50305	-6.10898	1.31368	0.482321	0.346464	0.137268	-0.818053	-0.477991	0.572584	-1.92238	-1.23665	-0.980328	-4.86511	2.9266	5.57321	6.64784	0.146039	0.630232	4.4724	-0.0160851	0.863016	0.20843	0.295659	-1.07048	0.651507	5.50754	-0.771879	16	-14.0326	-0.924952	2.80597	3.25959	0.486154	0.343393	6.30976	1.54164	-1.1161	-15.9517	-2.36604	3.43337	-0.404	-2.20453	0.596319
17	-9.40266	-2.6232	0.64105	0.581311	-1.99575	-2.37769	-4.22104	-6.78318	0.708748	1.41106	0.0859877	0.202727	-1.30078	-0.454692	0.869044	-2.40658	-1.65217	-1.35758	-2.89787	2.7654	6.42742	5.44126	0.258131	0.69648	4.92507	0.132187	1.22014	0.244715	0.281108	-1.09416	0.329514	4.60253	-0.553875	17	-14.304	-1.02415	2.75327	2.79019	0.860728	0.0915677	6.44121	0.986115	-1.12579	-15.6194	-2.37217	3.44657	-0.51266	-2.41019	0.998288
18	-9.35858	-2.49612	0.669133	0.647253	-2.25212	-2.59586	-4.67996	-7.4327	0.0812006	2.2289	-0.232816	-0.0118086	-1.82315	-0.448489	1.10108	-2.79993	-2.18828	-1.77026	-0.755757	2.58667	7.30138	5.35446	0.398916	0.733216	4.88837	0.49014	1.43275	0.249205	0.16549	-1.07842	-0.265419	3.7645	-0.611231	18	-15.2113	-1.01694	2.5612	2.90991	0.891702	-0.215857	6.62164	0.673977	-1.01925	-14.987	-2.26035	3.36532	-0.405159	-2.39236	1.13496
19	-8.86927	-2.42898	0.724737	1.04672	-2.40018	-2.74476	-4.65017	-7.80856	0.45041	2.25093	-0.525522	-0.238157	-2.12714	-0.413914	1.21216	-3.19354	-2.91807	-1.61326	1.48901	2.51165	8.12695	5.20715	0.448341	0.784967	4.31366	0.958016	1.58384	0.233501	1.05154	-1.07045	-0.433889	2.52491	-1.36093	19	-16.0482	-0.866208	2.57779	3.28382	0.960079	-0.588199	7.47572	0.646231	-1.08575	-13.2451	-2.56602	3.20837	-0.46839	-2.0292	1.31212
20	-8.40287	-2.37387	0.727749	0.92882	-2.52082	-2.74266	-4.7206	-7.84587	0.810233	1.27139	-0.727613	-0.210348	-2.31287	-0.449779	1.16242	-3.45389	-3.66628	-1.53664	2.89361	2.62994	8.7755	4.69426	0.419316	0.844529	3.34048	1.08775	1.35001	0.20826	1.74607	-1.12538	-0.80935	1.06442	-1.92358	20	-16.7135	-0.602132	2.65992	2.3694	0.950237	-0.881351	8.99431	0.696661	-1.2299	-11.4644	-2.81381	2.98971	-0.707674	-1.33464	1.25982
21	-8.37481	-2.22119	0.58933	0.0818732	-2.70368	-2.75452	-4.84291	-7.62733	0.656103	-0.226588	-0.879747	-0.0511871	-2.60459	-0.511805	1.03468	-3.48156	-4.4178	-1.44614	4.6316	2.86493	9.24558	3.92231	0.329836	0.88832	2.35754	1.10278	0.908712	0.177531	1.60466	-1.1317	-0.823962	-0.37953	-2.6322	21	-16.8702	-0.427564	2.59833	1.67027	0.914772	-1.16985	9.29057	0.781588	-1.21781	-10.3878	-2.54389	2.73837	-1.02151	-0.339478	1.06565
22	-8.44652	-1.89586	0.413061	-0.61539	-2.97283	-2.76615	-4.93963	-7.08755	0.754202	-1.0606	-1.03903	0.00313906	-3.13962	-0.615899	1.01995	-3.52321	-5.15013	-1.2187	6.01093	2.85142	9.50349	2.56152	0.23641	0.889712	1.59296	1.02457	0.485823	0.201236	1.63217	-1.07717	-0.708838	-1.29835	-3.25377	22	-17.0976	-0.107384	2.82794	0.864906	0.90891	-1.33891	9.78382	0.991865	-0.591139	-9.20707	-2.08494	2.53448	-1.83436	0.602762	0.859595
23	-8.21413	-1.4446	0.277815	-1.32275	-3.17775	-2.75986	-4.90294	-6.33225	0.245514	-1.91911	-1.27959	0.0570159	-3.57285	-0.735189	1.14577	-3.68947	-5.70081	-0.916381	6.97339	2.98991	9.59895	1.19915	0.14209	0.883295	1.02177	0.850853	0.164689	0.261317	1.98161	-1.09518	-0.507691	-2.2245	-3.81829	23	-17.2575	0.290061	3.3274	-0.21384	1.12756	-1.61846	9.77292	0.976413	-0.0810563	-7.5301	-1.25021	2.33837	-2.62349	1.22366	1.02528
24	-8.13608	-1.00208	0.234672	-1.61521	-3.41551	-2.71502	-4.74177	-5.46892	0.237921	-3.34844	-1.69451	0.0498212	-3.9229	-0.79714	1.51266	-3.85314	-5.99956	-0.825267	6.76629	2.87736	9.65522	0.155051	0.0871835	0.940354	0.48939	1.15854	-0.0682197	0.272691	2.02833	-1.23167	-0.0977932	-2.24229	-4.37909	24	-17.3521	0.712206	3.95478	-0.2744	1.12772	-1.9398	9.49438	0.127884	0.180773	-6.22121	-0.673068	2.11253	-3.3414	1.99917	1.04726
25	-8.25556	-0.712476	0.148196	-1.55686	-3.65024	-2.63945	-4.19583	-4.49931	0.230723	-3.88254	-2.22173	0.129977	-4.33188	-0.699513	1.76652	-3.85999	-6.03702	-0.509643	4.97122	2.68054	9.60462	0.493176	0.0788574	1.01752	-0.111239	1.28794	-0.144869	0.225741	2.38523	-1.20558	0.0959977	-1.83849	-5.1238	25	-17.15	1.09269	3.87483	0.18204	1.46079	-2.03921	8.71524	-0.783516	0.786342	-5.46037	-0.601604	1.93234	-3.48215	3.09091	1.16609
26	-8.01064	-0.477243	0.0064251	-1.38917	-3.75902	-2.55727	-3.66055	-3.32621	0.335361	-3.60152	-2.7588	0.173878	-4.5337	-0.572059	1.77044	-3.73556	-5.86066	-0.0753138	2.00103	2.61662	9.43102	3.13543	0.1329	1.06528	0.185642	1.21756	-0.0420643	0.172549	3.05366	-1.03883	-0.1845	-0.825831	-5.25906	26	-16.6194	1.35586	3.61093	0.669666	2.3676	-2.07197	8.14897	-2.0261	1.79767	-4.81657	-0.243111	1.89402	-3.05956	4.12534	1.22646
27	-7.77779	-0.335293	-0.141336	-1.09472	-3.81617	-2.51797	-3.00266	-2.40864	0.348598	-3.08793	-3.22345	0.0723882	-4.46341	-0.476366	1.58189	-3.59319	-5.52909	0.365535	-1.50321	2.21845	9.13399	4.286	0.223806	1.06203	0.784715	0.891239	0.227221	0.0152996	3.28159	-0.904484	-0.400955	0.531531	-4.92196	27	-15.5376	1.58237	3.62883	0.783814	3.30043	-2.05298	8.09592	-3.20133	2.52838	-4.0758	-0.417241	1.91224	-2.49478	4.83318	1.21958
28	-7.91071	-0.167792	-0.191071	-0.72364	-4.03704	-2.23349	-2.49701	-1.37988	0.0443836	-3.40197	-3.57663	-0.250107	-4.09713	-0.546754	1.34396	-3.40726	-5.12204	0.534433	-4.67458	1.8097	8.78194	5.1517	0.227926	1.0424	0.670462	0.809849	0.460258	-0.142256	3.04877	-0.816122	-0.78988	1.85996	-5.01735	28	-14.6816	1.99066	4.02597	0.890077	3.90944	-1.98077	7.02967	-4.43635	2.52005	-3.06249	-0.628493	1.9141	-2.01246	4.91142	1.39954
29	-7.51215	0.0966137	-0.208442	-0.807897	-4.17822	-1.82708	-2.15421	-0.16408	0.165981	-3.53466	-3.87951	-0.686267	-3.61907	-0.705016	1.22257	-3.25465	-4.93208	0.0925629	-6.44129	1.32508	8.52141	4.52806	0.235515	1.03668	0.0257393	1.10877	0.912415	-0.215197	3.17018	-0.742318	-1.7623	2.84451	-5.17501	29	-14.2414	2.23457	4.45012	0.236032	4.12427	-1.9546	5.52661	-5.77839	2.31365	-1.89079	-0.812711	1.8626	-1.70691	4.4497	1.49609
30	-6.72601	0.536783	-0.298161	-0.551761	-4.27868	-1.449	-1.8271	0.941057	0.381718	-3.30886	-4.20597	-1.30808	-3.00549	-0.92784	1.02708	-3.0068	-5.00237	0.237658	-7.10876	1.02658	8.4191	4.6201	0.300482	1.03779	-0.505756	1.61585	1.37379	-0.272432	3.11126	-0.627655	-2.94259	3.46113	-5.29837	30	-13.1749	2.35036	5.07281	-0.165129	4.15444	-1.84811	5.15129	-6.42491	1.88916	-0.511074	-0.830227	1.80895	-1.53259	3.82513	1.82229
31	-6.07421	1.00787	-0.43666	-1.08694	-4.15464	-1.24261	-1.40084	1.86723	-0.839566	-2.96832	-4.58669	-1.76639	-2.33681	-1.14089	0.890213	-2.82256	-5.01254	0.972956	-7.37113	1.01355	8.18195	4.2308	0.164486	1.06938	-0.790836	2.05287	1.60025	-0.270335	3.37072	-0.457344	-3.65234	3.24332	-5.35392	31	-11.5891	2.26876	5.49487	-0.629464	4.04405	-1.62434	5.77997	-6.19965	1.67562	0.863243	-1.09518	1.77359	-1.35536	3.67554	2.47522
32	-6.03545	1.4426	-0.54026	-0.943596	-3.91165	-1.2656	-1.7113	3.17195	-1.30488	-2.22992	-5.14946	-2.02434	-1.75302	-1.45009	0.797661	-2.75518	-4.91658	1.34633	-7.16584	0.807313	8.14939	3.02725	0.103319	1.16926	-0.806662	1.82609	1.4596	-0.226459	3.16696	-0.209202	-3.60589	2.46826	-5.51392	32	-9.14207	1.76535	5.67882	-0.327103	3.61382	-1.31162	7.42269	-5.75318	1.49699	2.281	-1.90589	1.94925	-1.1339	3.91152	3.67471
33	-6.08519	1.81568	-0.59072	-0.175356	-3.33999	-1.06015	-2.22934	4.43322	-2.01069	-1.13586	-5.78161	-2.23676	-1.2328	-1.78308	0.754702	-2.74326	-4.8835	1.50073	-6.79386	1.18233	8.42338	1.88624	0.0198584	1.35274	-0.394347	1.63775	0.907115	-0.157305	2.51585	-0.00700044	-3.49028	2.2567	-5.43293	33	-6.88097	1.65364	5.89414	0.508569	3.31433	-1.05453	8.27599	-5.21205	1.31066	2.91472	-2.63448	2.34855	-0.924533	4.23499	5.13734
34	-6.13264	2.08248	-0.654298	0.372184	-3.00649	-0.766869	-2.4414	5.18409	-2.83272	-0.417119	-6.34402	-2.25481	-0.969163	-2.04479	0.756216	-2.7162	-4.96939	0.990843	-6.49355	1.6216	8.61481	0.161907	0.0137077	1.56593	0.00998535	1.76387	0.358399	-0.133529	1.74457	0.0902808	-4.10247	2.53582	-5.89156	34	-5.4232	1.30525	5.69832	0.957374	3.85058	-0.787986	9.39982	-5.18417	1.08876	3.02579	-3.56809	2.82968	-0.859005	4.57495	6.27261
35	-6.14733	2.17944	-0.715576	1.46169	-3.19786	-0.653229	-2.19172	5.27565	-3.08315	-0.123735	-6.67304	-2.15406	-0.502963	-2.16192	0.50685	-2.72662	-5.154	0.570823	-5.95223	1.86664	8.76642	-1.7267	0.0870972	1.70379	0.670671	1.60964	0.245849	-0.0053564	1.05916	0.155832	-4.55133	2.73113	-6.46648	35	-4.86987	0.754367	5.36404	0.601517	4.77297	-0.483263	10.5257	-5.38322	1.44812	3.59951	-4.18986	3.12676	-1.12944	4.66381	7.2537
36	-6.20231	2.13205	-0.806178	1.94849	-3.22277	-0.456249	-2.03188	5.05953	-3.14503	-0.198366	-6.75509	-1.97113	0.116796	-2.25498	0.29049	-2.7222	-5.56381	0.279758	-6.1538	2.15709	8.80714	-1.90896	0.1689	1.77288	1.75698	1.83016	0.519358	0.00354595	0.380733	0.22403	-4.56976	3.2493	-6.75856	36	-4.032	0.194867	5.18155	0.695894	5.35102	-0.249745	10.926	-5.2822	1.61853	3.98438	-4.40484	3.45225	-1.87996	4.43998	8.30865
37	-6.17674	2.10515	-1.0361	2.03496	-2.96306	-0.373734	-1.74823	4.80886	-3.29858	-0.461585	-6.80438	-1.5496	0.825922	-2.37812	0.252357	-2.93273	-5.78176	-0.385494	-6.45122	2.40586	8.48436	-0.833257	0.187143	1.90152	2.49709	2.25487	0.562144	-0.207905	-0.547943	0.21016	-4.13983	3.89454	-7.3405	37	-3.08971	-0.312955	5.15132	0.614389	5.81849	-0.112041	11.6547	-4.72151	1.52135	4.49303	-4.92103	3.79847	-2.95145	4.06581	8.74382
38	-5.80644	1.9725	-1.26742	2.41467	-2.68702	-0.228182	-1.37605	4.32277	-3.79044	-0.884533	-7.01353	-0.970497	1.14546	-2.50892	0.207834	-3.29451	-5.67335	-0.894714	-6.10808	2.40467	7.9965	-0.0456257	0.318987	2.0857	3.41038	1.89939	0.374793	-0.507679	-1.58607	-0.0357586	-3.56123	4.24723	-7.19907	38	-2.26424	-0.192254	5.08295	1.02477	6.29905	0.0482859	12.1717	-3.72249	1.76994	4.74195	-4.8646	4.12792	-4.01792	3.56756	8.7223
39	-4.56847	1.71971	-1.39843	2.76735	-2.43668	0.0341373	-1.17841	3.75112	-3.49127	-2.83054	-7.25733	-0.561687	1.61101	-2.5738	-0.0175166	-3.58605	-5.57638	-1.3496	-7.10783	2.17632	7.78257	0.47281	0.410191	2.25386	4.93698	1.41858	0.654903	-0.621395	-1.92398	-0.278636	-3.47581	4.44802	-6.90387	39	-0.86272	-0.0849669	4.7194	1.78758	6.77775	0.123461	11.754	-2.79191	2.37466	4.87099	-4.38468	4.52003	-4.79671	3.13382	8.40981
40	-2.72903	1.49792	-1.27575	2.43512	-1.88554	0.27845	-1.46175	3.28125	-2.99435	-5.42628	-7.31602	-0.271611	2.00657	-2.55771	-0.325393	-4.15204	-5.58169	-1.99738	-8.28608	1.65804	7.61295	0.247681	0.450256	2.43968	5.77754	1.04006	0.20176	-0.66121	-1.59299	-0.435998	-3.70829	4.48112	-6.50363	40	-0.197161	-0.30229	4.24095	2.16988	7.08418	0.188474	10.895	-1.98248	2.46525	5.03645	-3.77382	4.75305	-4.74475	2.71135	8.0677
41	-1.34975	1.29937	-1.0006	2.27534	-1.89549	0.3546	-1.86893	2.15883	-2.80814	-7.67822	-7.1493	-0.0266491	2.26027	-2.6493	-0.771305	-4.89723	-5.46344	-2.63813	-8.20751	0.66526	7.38286	0.20836	0.471248	2.5446	5.13021	0.677621	-1.15656	-0.859934	-1.13456	-0.403533	-4.75459	4.57008	-5.8993	41	0.713745	-0.638245	4.17192	2.55595	7.28721	0.11253	9.6585	-1.12711	2.69014	5.5531	-2.88907	4.82415	-4.57792	2.40241	7.75902
42	-0.792501	1.0783	-0.677051	1.83315	-1.69747	0.466037	-2.19503	0.39571	-2.3716	-8.63951	-6.77763	0.231837	2.38153	-2.86108	-0.781979	-5.9532	-5.41146	-2.59623	-6.85602	0.0305768	6.81589	1.68216	0.328579	2.55593	3.84475	0.429282	-2.26202	-1.24591	-0.945328	-0.309933	-5.51611	4.76465	-5.06327	42	1.8031	-0.967613	4.24805	2.52433	7.31897	0.0117085	9.41492	-1.34976	2.72619	6.30088	-1.86424	4.88503	-4.21933	2.0367	7.3378
43	0.0188666	0.86886	-0.407139	2.45854	-1.67576	0.639328	-2.72617	-1.26757	-2.58538	-8.44051	-6.20117	0.587632	2.91415	-3.11855	-1.06152	-7.02586	-5.3609	-2.34757	-7.2322	-0.187653	6.1277	3.14343	0.208988	2.47341	2.33553	0.702487	-2.89897	-1.43161	-1.13145	-0.262071	-6.34073	4.69387	-4.33069	43	2.35866	-1.11282	4.39426	1.28361	7.26034	-0.00509756	8.20707	-1.81025	2.2323	7.14625	-0.913458	5.05959	-3.74163	1.46428	6.78369
44	0.892116	0.699854	-0.170681	3.68834	-1.52379	0.783033	-3.17522	-2.61733	-3.02128	-8.0044	-5.81061	0.897779	3.74224	-3.1522	-1.30529	-7.76608	-5.18213	-2.27795	-7.04304	-0.0146875	4.94265	4.54981	0.110296	2.36692	1.77674	1.18643	-3.37433	-1.49319	-1.67537	-0.184638	-6.86326	4.85291	-4.10371	44	2.68368	-1.10407	4.5711	0.548177	7.53771	0.143372	6.22039	-2.29455	1.69804	8.43669	-0.612332	5.51799	-3.54932	0.881668	6.599
45	2.36211	0.427239	0.034118	4.98436	-1.24388	0.989434	-3.59333	-3.51824	-3.20174	-7.82478	-5.54919	1.22571	4.32794	-2.72548	-1.26378	-8.12752	-4.91143	-2.06528	-5.03057	0.344671	3.87535	4.66115	0.452793	2.28974	1.4127	2.23029	-3.53479	-1.54133	-2.29316	-0.123827	-6.70843	5.02039	-3.80635	45	3.46592	-0.911781	4.84201	1.15256	8.01021	0.309082	3.73774	-2.70057	1.36239	8.89078	-0.775491	6.23062	-2.98872	0.37654	6.36239
46	3.36761	0.0269199	0.225812	5.64811	-1.39803	1.42685	-4.12358	-3.77484	-2.69052	-6.97066	-5.26835	1.47824	4.58065	-2.09977	-1.4631	-7.95712	-4.85217	-1.69869	-3.84593	0.449521	3.66723	4.65191	0.782751	2.18439	0.819131	3.04673	-3.01977	-1.57343	-2.21041	-0.211484	-6.21905	5.08513	-3.60808	46	4.7749	-0.513871	5.1466	2.34982	7.71669	0.442866	2.37232	-2.72994	1.31636	8.9141	-1.13796	7.10269	-1.87934	0.413053	5.95185
47	3.48507	-0.395333	0.547461	6.04134	-1.81229	1.79293	-4.74947	-3.91392	-1.74207	-6.71737	-5.07509	1.71345	4.69428	-1.62165	-1.74538	-7.40454	-4.77621	-1.30884	-3.38908	0.627998	3.14672	5.13494	1.11884	2.05185	0.2522	3.36673	-2.15146	-1.61284	-2.08508	-0.551687	-5.52212	5.34518	-3.58363	47	5.31817	-0.0286664	5.56488	3.0388	7.13876	0.525319	1.98733	-2.66508	1.41412	8.83657	-1.10089	7.94425	-0.428159	0.638501	5.49489
48	3.08832	-0.732356	0.874452	6.52111	-1.86542	2.03492	-5.82364	-3.94496	-1.07785	-7.08515	-4.96945	2.06789	4.56728	-1.26029	-1.80108	-6.47792	-4.40625	-1.23193	-2.6451	1.55908	2.69109	6.18514	1.03585	1.8772	0.505211	3.12699	-1.34918	-1.63089	-1.79564	-0.955736	-6.178	6.20531	-3.80248	48	5.33657	0.3068	5.82319	3.96147	7.41205	0.500875	2.21709	-2.49906	1.7583	9.7433	-1.02482	8.64232	0.70571	0.599351	5.00378
49	3.1011	-0.907396	1.14997	6.81059	-2.24478	2.07769	-7.081	-3.44144	-1.25037	-7.26466	-4.79864	2.26749	4.7208	-1.01578	-1.97325	-5.97805	-3.98557	-1.3972	-1.76698	2.74833	2.45307	5.7738	1.10695	1.72815	1.22649	2.67907	-0.68193	-1.5872	-1.86088	-1.30518	-6.67538	6.75268	-4.63366	49	5.08332	0.91531	6.18813	5.02704	7.73025	0.479105	2.52323	-2.09279	1.82565	10.5176	-1.44155	9.22286	1.4202	0.515042	4.68545
50	2.69394	-1.03371	1.4296	6.44556	-2.79443	2.16594	-8.4145	-3.01432	-1.02466	-7.00456	-4.53639	2.78579	5.01481	-0.999017	-1.94121	-5.82861	-3.61822	-1.47479	-2.28684	3.52563	2.10425	4.71253	1.32922	1.46146	1.48377	2.24293	0.127921	-1.70913	-1.92732	-1.56516	-6.99302	6.87937	-5.04244	50	4.50242	1.80498	6.81738	6.18958	7.72562	0.504019	3.04398	-1.97824	1.9961	10.0102	-2.03649	9.93966	1.48269	0.490716	4.31337
51	1.95091	-1.40999	1.62038	5.78481	-3.16496	2.28045	-9.79986	-2.90102	-0.6956	-6.85914	-4.16254	3.62739	5.35422	-1.06381	-1.79583	-5.86931	-3.19011	-1.57956	-2.90207	4.38122	1.90432	4.9141	1.54149	1.1285	1.71026	2.20418	1.12343	-1.83067	-2.35297	-1.69406	-6.62081	6.53162	-3.85922	51	4.4796	2.41593	7.56926	5.93534	7.65083	0.545632	3.19197	-1.97262	2.34436	9.77178	-2.87516	10.7366	1.06345	0.42826	3.99048
52	1.41182	-1.76112	1.66385	6.09532	-3.28101	2.37102	-10.6414	-2.75927	0.433368	-6.22337	-3.66966	4.33899	5.69266	-1.35952	-1.67425	-5.62151	-2.84503	-1.21185	-3.60251	5.30212	2.44214	4.76111	1.6991	0.897566	1.88146	2.18811	1.70373	-1.74842	-2.65624	-1.7622	-6.69438	6.87042	-2.63454	52	3.57797	2.66543	8.55888	5.47408	7.60996	0.57562	3.74323	-2.14571	2.40225	9.25475	-3.28418	11.2924	0.857004	0.311425	3.93005
53	0.771127	-1.97865	1.62847	6.01846	-3.36778	2.52554	-10.9036	-2.57241	0.0780292	-5.07564	-3.31189	4.79739	5.85938	-1.70725	-1.48769	-5.05976	-2.47357	-1.77163	-3.75328	6.22549	3.40853	3.6857	1.74228	0.843108	2.50567	2.79058	2.64152	-1.52551	-2.69218	-1.82631	-6.35474	7.43776	-1.62631	53	1.92311	2.82994	9.71087	6.34117	7.63568	0.60427	4.4219	-2.00725	2.52343	8.1818	-4.10577	11.5997	1.00547	0.133671	3.79774
54	1.06152	-2.11449	1.36214	6.11672	-3.19441	2.54594	-11.1981	-2.8504	-0.604561	-4.41177	-3.06104	5.02665	5.9916	-2.00427	-1.07574	-4.72227	-1.95431	-1.84706	-3.39444	6.72815	3.9977	4.40019	1.58645	0.975118	2.77385	3.27978	3.44992	-1.41136	-2.23546	-2.20458	-6.28399	7.45725	-0.82654	54	0.979952	2.80985	10.911	6.65761	7.8916	0.678229	4.67365	-1.54342	2.95585	7.66767	-5.47551	11.8238	0.858235	-0.203275	3.53587
55	2.24743	-2.06562	1.24319	5.5336	-2.91205	2.37216	-11.7368	-3.82369	-0.33912	-4.76929	-2.88228	5.06436	6.15728	-2.31062	-0.661621	-4.44298	-1.99771	-1.65342	-4.26036	7.80336	4.5352	6.15499	1.69365	1.14838	3.33254	2.79269	4.49252	-1.52871	-2.19956	-2.57528	-6.86771	7.62085	0.434598	55	-0.0824966	2.78388	12.1308	7.00795	8.02714	0.618145	3.99269	-1.00932	3.51088	7.84619	-6.86368	12.0916	0.41852	-0.274619	3.2002
56	4.56618	-1.74463	1.35097	5.18388	-2.8312	2.44508	-12.0648	-4.59313	-0.567216	-5.09923	-2.64909	5.20926	6.33691	-2.59775	-0.124854	-4.05124	-2.22338	-1.34605	-5.25897	9.09201	4.94941	7.05886	1.79432	1.28974	3.8736	2.01942	5.70252	-1.67642	-2.42105	-2.69867	-6.98587	7.06226	1.32716	56	-1.20777	2.87672	13.3075	6.86027	7.70253	0.566576	3.42236	-0.519253	3.86403	8.44584	-8.06092	12.3303	-0.455925	-0.512469	2.9455
57	6.88821	-1.38661	1.58114	5.04364	-2.63361	2.60911	-12.1108	-5.30107	0.213688	-4.8209	-2.40313	5.30098	5.82014	-2.81425	-0.0320906	-3.63439	-2.246	-1.75045	-5.87058	10.7346	4.98936	6.97924	1.8222	1.42087	3.86885	1.84512	6.22945	-1.9224	-2.98663	-2.71813	-6.78107	5.67511	2.05124	57	-1.00208	2.90589	14.5543	6.2868	6.97162	0.481901	3.74137	-0.332599	4.16591	8.89676	-8.36992	12.5985	-0.838918	-0.920029	2.958
58	8.88465	-1.1575	1.74235	5.79458	-2.43864	2.536	-12.206	-5.97864	0.584568	-4.25761	-2.26494	5.30195	5.26436	-2.80109	0.144191	-3.23302	-2.27021	-2.56229	-6.18226	12.4668	5.36133	5.32132	2.03347	1.51877	3.80067	1.31976	6.26006	-2.16365	-3.44231	-2.82754	-7.00267	4.35168	2.80874	58	0.275436	2.7696	15.8402	5.84757	6.41863	0.52321	3.35209	-0.379334	4.15005	9.47987	-8.2653	12.8714	-0.422221	-1.44651	3.37594
59	11.3381	-0.992012	1.59316	6.38798	-2.0857	2.39754	-12.7025	-6.59994	0.811668	-3.85829	-2.10801	5.47651	5.10864	-2.77318	0.292763	-2.87361	-2.25641	-2.7304	-6.72308	13.71	5.80884	3.58629	2.11962	1.61502	3.31356	0.689127	6.79024	-2.29639	-3.65128	-2.87502	-7.95252	4.02464	3.26576	59	0.353885	2.85451	16.8354	5.21542	6.22526	0.586248	3.09395	-0.507075	3.89372	9.70399	-7.50703	13.0438	0.493439	-1.96154	3.31849
60	13.307	-0.958523	1.35585	6.49198	-1.85384	2.36843	-13.2764	-7.41901	0.735824	-3.78839	-1.94492	5.39315	5.06385	-2.94446	0.715476	-2.3301	-2.13066	-2.62932	-8.49881	13.0584	6.20257	2.98518	2.22035	1.71264	1.74442	0.489233	6.99823	-2.61094	-4.15823	-3.03943	-8.6914	4.08212	3.49773	60	0.195481	3.07863	17.3333	5.95231	5.81089	0.604193	3.07272	-0.505809	3.59596	10.7468	-6.47942	13.1952	2.08489	-2.19803	3.00656
61	14.4849	-1.00445	1.17935	6.27623	-2.04245	2.45333	-13.3017	-8.07138	1.16177	-4.05627	-1.74123	5.15865	5.25832	-3.16932	1.21797	-1.40758	-1.72456	-2.73647	-7.78434	11.1566	6.73592	3.29531	2.32891	1.84937	-0.0541645	0.585328	6.40305	-2.75689	-4.79115	-2.95077	-9.13238	4.13427	3.66227	61	1.2758	3.3984	17.3761	5.72945	5.07789	0.57915	4.49655	-0.443531	3.37008	12.2728	-5.28003	13.4152	4.04807	-1.91111	2.70248
62	14.8555	-1.04764	1.14055	6.62963	-2.35897	2.52936	-13.0113	-8.52864	2.00392	-4.51128	-1.4028	4.96284	5.53255	-3.18451	1.9582	-0.884433	-1.20551	-3.34909	-6.1169	8.79979	6.87402	4.58235	2.53746	2.00526	-1.04679	-0.0419127	6.01608	-2.62524	-4.5186	-2.82474	-8.76915	3.95217	3.38288	62	2.75424	3.56294	17.219	5.87625	4.19913	0.564955	5.10138	-0.318913	3.03861	13.9442	-4.26717	13.6056	5.24091	-1.26914	2.67085
63	14.4522	-0.857138	1.26165	6.50692	-2.82664	2.57066	-12.7483	-8.88751	3.15463	-5.09866	-0.901026	4.68015	5.99305	-3.08643	2.29468	-0.632421	-1.01745	-3.95115	-5.06345	6.07977	6.91181	3.40551	2.54632	1.99445	-1.39982	-1.02508	6.16082	-3.08483	-4.46712	-2.77897	-8.09271	4.29893	2.80387	63	4.33996	3.50413	17.1102	5.54398	3.6194	0.543675	6.21931	-0.268346	2.7025	14.7646	-4.1616	13.7205	5.374	-0.499328	2.97024
64	14.3388	-0.596026	1.4809	5.61311	-3.1186	2.61212	-12.6208	-8.22914	3.47813	-5.36948	-0.522724	4.56313	6.33594	-2.85492	2.43491	-0.570823	-1.05702	-4.47551	-4.10273	3.61539	7.0106	3.2705	2.54446	1.84529	-1.60404	-1.83882	5.8235	-3.81779	-4.41938	-2.67238	-8.1554	4.64522	2.08478	64	6.49756	3.44483	17.0689	5.28461	3.32092	0.426707	7.49231	-0.786066	2.42693	15.614	-4.12751	13.802	5.2626	0.293784	3.28398
65	14.7136	-0.253747	1.69874	4.72794	-3.67994	2.53223	-12.5391	-7.55021	3.33252	-5.76527	-0.413194	4.37059	6.0351	-2.5901	2.84637	-0.40513	-1.08721	-4.53147	-3.64468	2.54388	6.97209	3.19148	2.57384	1.6607	-2.45809	-2.51632	5.79844	-4.63884	-4.20197	-2.36354	-7.52481	4.16172	1.21847	65	8.94699	3.20789	16.8906	5.83177	3.0007	0.296952	8.57757	-1.3324	2.06803	16.471	-3.56104	13.9847	5.16029	1.02512	2.9239
66	15.72	-0.0990342	2.08986	4.10068	-4.22774	2.48053	-12.6967	-6.99758	2.74993	-5.4869	-0.385762	3.95935	5.55222	-2.45328	3.29718	-0.160471	-1.07545	-5.12609	-4.30726	2.03312	6.96689	4.09591	2.48587	1.43321	-3.72856	-2.90395	5.42373	-5.15476	-4.01932	-2.2016	-6.91883	4.07452	-0.0618004	66	11.1603	3.27023	16.6765	5.83977	2.59496	0.217638	9.57159	-1.67406	1.57741	16.8944	-2.53576	14.144	5.25732	1.89422	2.3073
67	16.5515	0.0510108	2.36948	4.20226	-4.92651	2.30819	-13.4667	-6.16436	2.09161	-4.50672	-0.427858	3.42268	5.46439	-2.29768	3.5989	-0.0200296	-0.991765	-5.49624	-5.33367	1.7126	6.58348	5.39334	2.22036	1.17768	-4.45713	-2.86815	4.84363	-5.67149	-3.99081	-2.10053	-7.71684	3.76143	-1.47664	67	11.9103	3.38366	16.354	6.1	1.84287	0.103244	9.90817	-2.11066	1.12889	16.8624	-1.53926	14.2354	4.97252	2.65575	1.91279
68	17.5049	0.112424	2.60043	4.43204	-5.25127	2.20002	-14.354	-4.84996	1.60861	-4.08391	-0.756369	2.77178	5.43128	-1.77754	3.80018	0.438551	-0.871876	-5.47012	-6.59973	1.3696	6.30299	6.9573	1.80928	1.00691	-3.55844	-2.49835	4.41232	-6.42974	-4.15779	-1.90891	-9.76727	3.82873	-2.5708	68	11.3753	3.16981	15.9731	8.12814	1.33096	-0.0880599	9.86912	-2.51141	0.835009	16.8843	-0.941068	14.3571	4.06833	3.15331	2.22731
69	17.7517	0.159134	2.87632	4.75233	-5.46588	2.10143	-15.3142	-3.59197	1.21865	-3.23689	-1.26459	2.13459	4.91517	-1.24001	3.98469	0.668715	-0.789469	-5.58693	-6.3122	0.817742	6.32244	8.35619	1.30106	0.962027	-1.97082	-1.93319	4.38267	-7.13427	-4.20514	-1.7972	-10.9782	3.5781	-3.20064	69	10.4987	3.03222	15.5885	8.93416	1.25412	-0.321631	9.94036	-2.74779	0.623261	16.3266	-0.654096	14.3804	2.80042	3.45819	2.55695
70	17.0293	-0.0758446	3.04134	4.40625	-5.32194	2.02883	-16.0997	-2.48174	1.51808	-2.76247	-1.82683	1.52844	4.03561	-0.821559	3.91974	0.884278	-0.66303	-5.67044	-5.76073	0.547494	6.43658	8.97331	0.917603	0.871884	0.0898679	-1.53533	4.47134	-7.49387	-3.78797	-1.63558	-11.6343	3.43344	-3.11376	70	9.18296	3.25172	15.0242	8.85231	1.53817	-0.486029	10.4112	-2.95209	0.384331	15.6671	-0.247377	14.6842	2.37125	3.56689	2.88126
71	15.2662	-0.384849	3.25734	4.69441	-5.50838	1.86292	-16.4505	-1.86475	2.81085	-2.63169	-2.24506	1.00581	3.42288	-0.709195	3.74236	0.990881	-0.198778	-5.40752	-4.7417	-0.366845	6.075	8.44271	0.245067	0.638678	1.11809	-1.07049	3.97755	-7.64037	-2.88888	-1.25059	-12.3208	3.87748	-2.97821	71	7.79118	3.64531	14.3146	8.56871	1.80746	-0.485119	10.5651	-3.24802	0.109362	14.98	-0.225297	15.1464	2.84125	3.44393	2.99683
72	13.6603	-0.679225	3.58118	5.00439	-6.06256	1.87008	-16.2521	-1.3291	4.03534	-2.45618	-2.48983	0.439002	2.85534	-1.07843	3.74205	0.900744	0.509052	-4.89606	-4.42083	-0.720999	5.12266	9.46668	-0.443588	0.405632	0.770007	-0.267179	3.96832	-7.68146	-2.01917	-0.877045	-12.0801	4.46936	-3.58294	72	6.75193	3.89293	13.6282	7.91109	1.78377	-0.349049	9.96743	-3.32785	-0.10493	13.2071	-0.0785146	15.3426	3.77339	3.25569	2.51077
73	12.8494	-0.909927	3.90424	4.40033	-6.52057	1.91162	-16.0269	-0.724035	5.20262	-2.58885	-2.88994	-0.132927	2.29454	-2.02759	3.78119	0.287816	1.24269	-4.51902	-2.98993	-0.77472	3.7889	10.5508	-1.04015	0.334256	-0.226143	1.07748	3.64533	-7.54803	-1.46748	-0.661124	-11.8761	4.21646	-3.97592	73	5.40278	4.44079	13.1167	6.49084	2.11736	-0.0143476	9.06832	-3.43418	-0.239897	11.4394	0.010281	15.1802	3.83756	2.98277	2.29396
74	11.4571	-1.04091	4.2407	3.72625	-6.61059	1.94375	-15.6703	0.628571	5.66199	-2.29177	-3.42018	-0.940355	2.23278	-2.97029	3.8134	-0.681185	2.20949	-4.07904	-1.63712	-0.948624	2.70078	12.1805	-0.980729	0.336534	-0.503478	2.31959	2.79202	-7.21497	-1.06994	-0.368832	-12.3021	4.04221	-4.22468	74	3.99891	5.36939	12.671	5.756	2.75657	0.414185	8.21099	-3.91358	-0.264954	10.2172	-1.02027	14.7877	3.33606	2.66035	2.33199
75	10.3831	-1.06185	4.30948	3.03624	-6.53423	1.93687	-15.3739	2.1691	5.04174	-1.63538	-3.75365	-2.14946	1.98352	-3.95901	3.47541	-1.52955	2.94109	-3.88651	-0.679109	-1.01446	1.32563	12.3933	-0.227849	0.275587	-0.798874	2.68358	1.81308	-6.63264	-1.28611	-0.119119	-13.8688	3.39864	-4.74543	75	3.20046	5.98048	12.4204	6.30222	2.75476	0.647306	8.06158	-4.423	-0.267237	8.74262	-1.98919	14.1636	3.27512	2.41195	2.23815
76	10.1802	-0.77032	4.06597	2.30692	-7.04108	1.95395	-15.1881	2.62235	3.57207	-0.733204	-3.83341	-3.15323	1.83604	-4.83225	2.8442	-2.38703	3.31659	-3.23042	0.0797315	-1.1649	-0.0674846	12.5513	0.546717	0.142313	-1.05694	2.14576	1.15904	-6.01772	-1.34866	0.069733	-14.6456	3.01421	-4.09672	76	2.16862	6.36838	12.3924	7.19921	2.42006	0.784435	8.0923	-5.46171	-0.341743	6.63487	-2.71706	13.3522	4.14132	2.07136	1.87981
77	10.6676	-0.705185	3.80106	1.38787	-7.24196	1.89165	-14.7307	3.08719	1.51102	-0.554633	-3.72053	-3.73221	2.00777	-5.60483	2.39839	-2.95323	3.49273	-3.05753	-0.588727	-1.1059	-1.23962	10.8867	0.846687	0.0448681	-1.75251	0.435897	0.313772	-5.77827	-1.19264	0.0973156	-15.4399	2.95161	-2.69368	77	1.77762	6.43654	12.2991	9.18918	1.88604	0.84407	7.60611	-5.92461	-0.344503	3.824	-3.74326	12.4043	4.84216	1.61889	2.03226
78	11.371	-0.681529	3.50279	0.919045	-6.77752	1.91428	-14.6713	3.8254	1.13548	-0.410535	-3.67091	-3.34238	2.11953	-5.86572	1.93707	-3.32197	3.25281	-3.46617	-2.23842	-1.82683	-2.66736	8.92326	1.83038	0.0947588	-2.83967	-0.98814	-0.69588	-5.43452	-1.50058	-0.302696	-16.9838	2.87981	-1.41602	78	0.788492	6.47987	12.0742	10.5929	1.31696	0.834467	7.53617	-5.69157	-0.224515	0.842463	-4.40812	11.4426	4.97567	1.1243	2.02689
79	12.0421	-0.573147	3.12485	0.528474	-6.03378	1.76538	-14.9513	4.27456	2.26385	0.723005	-3.69428	-2.51526	2.06716	-5.87269	1.36879	-4.11119	2.67327	-3.56984	-2.42636	-2.73395	-3.29066	8.71486	2.54021	0.22235	-4.13329	-1.70852	-1.71755	-5.41989	-2.57971	-0.725485	-18.2003	2.51362	-0.837253	79	-0.480979	6.23223	11.6439	11.3487	0.607496	0.767484	7.70867	-5.50398	-0.0368927	-1.19783	-5.57288	10.5178	5.11917	0.637938	1.83833
80	12.5569	-0.478736	2.73909	-0.314278	-5.15468	1.41501	-14.9746	4.5134	2.78583	1.44712	-3.74887	-1.63613	1.83423	-5.93791	0.692773	-5.0663	1.81612	-3.69867	-2.676	-3.77753	-3.50043	9.3436	3.57141	0.553546	-5.14502	-2.21601	-2.75715	-6.21281	-3.56262	-1.15129	-18.2539	2.01018	-0.511673	80	-1.95247	5.85302	11.2508	11.8029	-0.214252	0.735266	7.3424	-5.18437	0.0497477	-3.54505	-6.37511	9.6295	5.02749	0.0159102	1.83646
81	12.3802	-0.46353	2.28935	-1.11163	-5.05859	1.03736	-14.9446	5.08307	4.70713	1.61959	-3.66506	-0.89593	1.3873	-6.17753	0.1466	-5.71768	1.29091	-3.5522	-1.43156	-4.64552	-3.28988	9.01436	4.1998	0.955143	-4.99931	-2.30278	-3.84316	-6.96954	-4.27089	-1.41849	-17.8643	1.89078	-0.689449	81	-3.74799	5.34963	10.9916	12.0309	-1.21942	0.803981	6.75892	-4.99584	-0.00672472	-5.29313	-6.43829	8.87082	4.59575	-0.984744	2.09097
82	11.6821	-0.442606	1.97427	-2.32089	-5.61828	0.56752	-14.9972	5.6624	5.83976	1.51276	-3.51457	-0.0442176	0.674479	-6.26194	-0.46106	-6.26344	1.17025	-3.29063	-0.515307	-5.20817	-2.99034	6.94061	4.71133	1.29259	-3.39392	-1.93861	-5.52525	-7.3439	-4.59807	-1.79663	-18.3098	1.62166	-1.34804	82	-5.0692	5.11945	10.7594	12.2774	-2.38418	1.0064	6.53346	-4.85813	-0.0823292	-6.15354	-5.48623	8.15096	4.18838	-1.78621	2.34916
83	11.1674	-0.443443	1.84542	-4.63646	-5.97214	0.088027	-15.3115	5.96124	6.94013	1.69551	-3.38641	0.98123	0.096595	-6.13021	-0.979779	-6.6554	1.0746	-2.98154	0.63398	-4.58657	-2.67631	4.69397	4.9221	1.68416	-1.97913	-0.854603	-6.82835	-7.6405	-4.85387	-2.33128	-18.4861	1.19729	-2.13764	83	-6.79621	4.59882	10.5409	13.6374	-3.1638	1.23555	6.58443	-4.295	-0.0792858	-6.63484	-3.53528	7.42661	4.01861	-2.33219	2.60116
84	11.7793	-0.600964	1.69957	-6.26632	-5.79662	-0.216388	-15.8272	6.29205	8.54303	1.39019	-3.12963	1.88005	-0.415366	-6.08905	-1.47352	-7.04185	1.01919	-2.52945	2.30029	-3.85357	-2.70548	3.54222	3.42924	2.06732	-1.96517	0.167111	-7.23043	-8.19227	-5.51695	-2.85178	-18.3064	0.443126	-2.14529	84	-6.89857	3.61878	10.2484	15.1939	-3.66386	1.45061	6.47312	-3.54247	0.00131035	-6.5717	-1.11774	6.78162	4.26122	-2.70398	2.79594
85	12.8734	-0.63558	1.29407	-6.9416	-5.49779	-0.316401	-16.1379	6.00217	8.56395	1.12812	-2.77137	1.91091	-0.673541	-6.07325	-2.08698	-7.49482	0.83164	-2.36777	5.48453	-3.8975	-2.87707	3.71115	2.42135	2.35066	-2.10871	0.999601	-6.97969	-8.38626	-5.80986	-3.19831	-19.5347	-0.844123	-2.32047	85	-5.36869	2.71599	9.91652	16.0579	-3.92802	1.61418	5.75901	-2.79892	0.153195	-6.46047	1.24977	6.27827	4.3602	-3.14916	2.69431
86	13.7941	-0.572163	0.975098	-7.02023	-5.27453	-0.305728	-16.0933	6.19229	8.01494	0.7637	-2.53802	1.43752	-1.39304	-5.97646	-2.77315	-7.80995	0.541296	-2.30225	7.37667	-4.90763	-3.00612	3.93225	1.67239	2.46934	-2.92489	0.955786	-6.46962	-8.13849	-5.86462	-3.39774	-21.8726	-1.35575	-2.86017	86	-3.45587	2.05707	9.57076	16.5568	-3.75251	1.59036	5.00214	-1.9658	0.238778	-6.19045	3.21138	5.83358	4.85243	-3.72368	2.10804
87	15.6134	-0.587409	0.589176	-6.67665	-4.49579	-0.340382	-15.8935	6.41948	7.73507	0.789225	-2.61475	1.03158	-2.31119	-5.67112	-3.40333	-8.03599	0.370562	-2.03939	6.64227	-5.67061	-2.99835	3.89195	0.674948	2.57089	-4.09577	0.991668	-5.9757	-7.39922	-5.43221	-3.31136	-23.1598	-1.20499	-3.18391	87	-3.22514	1.29165	9.18423	16.9245	-3.26632	1.52391	4.55239	-1.39958	0.166364	-5.63512	4.88354	5.45584	4.66032	-4.13214	1.78954
88	17.4839	-0.688372	0.336772	-5.71152	-3.55511	-0.478035	-15.9408	7.00785	7.33745	1.16264	-2.72987	0.685404	-3.52154	-5.30481	-3.93472	-7.91164	0.192121	-2.33	6.24647	-5.97965	-2.64098	3.62224	0.301246	2.72975	-5.27884	1.41437	-4.94288	-7.04401	-4.06179	-3.18167	-22.655	-1.09372	-3.7241	88	-4.964	0.317393	8.7194	17.0916	-2.60947	1.48107	4.33584	-1.0516	0.0819973	-4.05545	5.88913	5.30235	3.84745	-4.39291	1.85865
89	19.0056	-0.73636	-0.106703	-4.74309	-2.94974	-0.514448	-16.2784	8.25198	6.13026	1.44146	-2.84201	0.121631	-4.70034	-4.7273	-4.07542	-7.79152	-0.0181172	-2.48287	5.8302	-5.68615	-2.23451	2.30212	0.459353	2.88316	-6.74751	2.30719	-3.67339	-6.78074	-2.98274	-3.08206	-20.781	-1.18336	-4.66831	89	-7.05301	-0.644506	8.2295	16.8113	-1.88496	1.37053	3.67102	-0.880435	0.0055279	-1.92018	6.34854	5.29365	3.22954	-4.47092	1.68554
90	20.1593	-0.72499	-0.588778	-3.77704	-2.78004	-0.485079	-16.6328	10.2983	4.90926	1.68467	-2.90463	-0.900318	-5.57201	-3.86787	-4.11189	-7.62117	-0.554583	-2.78665	6.23353	-5.37653	-1.75168	3.20892	0.634013	2.97865	-7.41783	3.3788	-2.83971	-6.82601	-1.30071	-3.0571	-20.065	-1.62604	-4.45016	90	-7.61892	-1.32532	7.77696	15.9923	-1.24952	1.22375	3.31883	-0.785339	0.0281077	0.00542287	5.68923	5.28017	3.91194	-4.52012	1.73459
91	21.1665	-0.766611	-1.21085	-3.59219	-2.58188	-0.47736	-16.6341	13.4781	3.78701	2.17866	-3.01221	-1.91835	-6.41355	-2.90864	-3.96719	-7.37632	-1.19166	-3.10155	6.78167	-5.70344	-1.436	4.10955	1.10622	2.98289	-7.77954	4.32335	-1.53306	-8.07787	0.561237	-3.07353	-22.2412	-2.02168	-3.91743	91	-6.63171	-1.68015	6.99965	15.1977	-0.732753	0.952225	3.26177	-0.641979	0.0894509	1.54556	4.51645	5.22652	5.59448	-4.6915	1.83282
92	21.6644	-0.859258	-1.85043	-3.44135	-2.96737	-0.393719	-16.7682	18.7953	3.0498	2.7602	-2.97338	-2.71527	-7.6729	-2.19507	-3.71119	-7.35284	-1.59033	-3.37372	7.0213	-6.43787	-1.08296	5.48736	1.54034	2.9285	-7.35815	4.64601	-0.586329	-9.29854	1.76252	-3.07646	-23.5677	-2.82211	-3.22761	92	-5.04959	-1.78804	6.16418	15.1502	-0.304166	0.506881	3.06986	-0.540362	0.206613	1.88976	3.74513	5.11908	6.42904	-4.80369	2.11948
93	21.1582	-0.930678	-2.19269	-2.65435	-3.39764	-0.0754149	-16.8925	25.2729	3.02149	2.98718	-2.6939	-3.27489	-8.39648	-1.86226	-3.39538	-7.47324	-1.64135	-2.70851	6.84008	-6.70265	-0.694867	6.0164	1.49234	2.80756	-6.583	4.79313	0.508832	-9.06155	3.08101	-2.87466	-23.9756	-3.58264	-2.24849	93	-2.55198	-1.57983	5.39789	15.9935	-0.0524021	0.184699	2.21854	-0.532512	0.220689	1.88017	3.49853	4.97737	5.58218	-4.71346	2.48441
94	21.2757	-1.23634	-2.66471	-2.01302	-4.19354	0.358008	-16.6944	31.6686	3.25168	3.00924	-2.1936	-4.04336	-8.91115	-2.27783	-3.24396	-7.47544	-1.3486	-1.33785	6.42782	-5.65438	-0.11838	6.29045	1.83193	2.63497	-7.06128	5.54383	1.5406	-8.23535	5.18167	-2.51211	-24.5442	-4.344	-0.418706	94	-1.3603	-1.29807	4.70306	16.4601	0.151374	-0.060566	1.33434	-0.343098	0.16721	1.88938	3.33342	4.82474	4.16987	-4.5016	2.75853
95	21.5483	-1.45269	-3.08374	-2.26358	-5.28358	0.676066	-16.446	37.1834	3.11638	2.95595	-1.58085	-4.88639	-8.35203	-3.27683	-3.37297	-7.59685	-0.941123	-0.657219	6.24877	-4.27049	0.36467	6.91572	2.45087	2.33416	-7.37493	5.0183	2.37378	-6.79087	7.64521	-2.05862	-23.9378	-5.31197	1.11835	95	-2.36255	-0.965982	4.09947	16.8074	0.377049	-0.276363	1.06843	-0.125702	0.120119	2.12864	2.57012	4.7363	3.27517	-4.1952	3.15786
96	21.7315	-1.25363	-3.31044	-2.26667	-6.03852	0.740476	-16.3211	42.3713	2.7669	3.63368	-1.09672	-5.11207	-7.90598	-4.11903	-3.39302	-7.61439	-0.553384	0.294808	6.73835	-2.1844	0.652037	7.60276	2.23559	1.83073	-7.80347	4.81142	3.25283	-6.30881	8.55831	-1.83571	-23.2607	-6.24056	2.75703	96	-3.81135	-0.756053	3.67912	16.768	0.54385	-0.660194	1.12069	0.259788	0.0956491	2.78196	1.79274	4.82356	3.6581	-3.80512	3.48271
97	21.4468	-0.615048	-3.47222	-2.61307	-6.51967	0.565137	-16.1604	45.8646	2.10911	4.45554	-0.665424	-5.18758	-7.31001	-4.85023	-3.25399	-7.52361	-0.393421	0.59025	5.97653	-0.728685	0.65541	7.4229	1.98929	1.33916	-8.31488	4.55229	3.52662	-6.37249	8.55532	-1.7722	-23.8241	-7.89719	4.04438	97	-5.21582	-0.505361	3.37929	16.4799	0.6375	-0.942944	1.19883	0.791913	0.0878646	3.68735	1.29162	4.96931	5.2022	-3.36844	3.67592
98	19.9692	-0.0614458	-3.29379	-3.22555	-6.66685	0.433042	-16.1013	47.2586	1.01918	4.91743	-0.389116	-5.94809	-6.39549	-5.2227	-3.17384	-7.52763	-0.501449	0.615841	4.3176	-1.6903	0.454912	6.78455	2.30421	0.898321	-8.31511	4.75207	3.32963	-6.48726	8.52174	-1.6023	-23.6624	-9.03477	4.32811	98	-5.44656	-0.158509	3.15963	15.5016	0.653882	-1.18403	0.847837	1.38704	0.0906719	4.54222	1.20614	5.12393	6.36972	-2.90063	3.8902
99	18.3333	0.160421	-2.83135	-2.80513	-6.65075	0.338721	-16.0156	47.0115	0.651498	4.85093	-0.404068	-7.20745	-5.37707	-5.16183	-3.20963	-7.4165	-1.00515	0.574681	2.57571	-3.09697	0.593213	5.82233	2.47929	0.560513	-7.53965	5.301	2.47314	-6.70314	9.27054	-1.38891	-22.2603	-9.06132	4.3111	99	-4.69525	0.291628	3.20935	15.1942	0.592857	-1.42298	0.618419	2.13395	0.0951433	6.18738	0.737885	5.38067	7.00109	-2.42926	3.92336
100	16.1205	0.305148	-2.32198	-2.25124	-6.7106	-0.145949	-15.9606	45.3368	1.603	4.91857	-0.898937	-8.36591	-4.25394	-4.80714	-3.25415	-7.67362	-1.53425	1.0543	2.93532	-3.93126	0.860266	3.2387	1.88457	0.284892	-5.83552	5.83866	1.1239	-6.6068	10.7783	-1.083	-20.6971	-7.79734	4.13623	100	-4.09862	0.875886	3.47906	15.1982	0.53114	-1.55134	0.468055	3.04753	0.20272	8.74138	0.299771	5.8687	7.20258	-1.98758	3.76001
[truncated: 51 more columns]

## Sheet: Upper Trapezius Differences
COMB	C = CONTROL		P = PAIN																															Overhead Reach
% Motion	C02R	C03R	C04R	C06R	C07R	C10R	C12R	C18R	C21R	C02L	C03L	C04L	C06L	C07L	C10L	C12L	C18L	C21L	P01R	P04R	P05R	P06R	P07R	P08R	P09R	P01L	P02L	P03L	P04L	P05L	P06L	P07L	P09L	% Motion	C02R	C03R	C04R	C06R	C07R	C10R	C12R	C18R	C21R	C02L	C03L	C04L	C06L	C07L	C10L
1	0.581993	-2.4118	0.0933019	-1.2672	-0.943274	1.34549	0.780617	5.03342	-1.90916	0.351715	-0.713698	-1.61901	2.63147	-0.112531	-0.0836747	-0.286725	-2.46762	-1.14854	2.4227	0.675509	-0.665627	-1.42139	-2.4587	-1.07668	2.5361	-1.39732	2.99407	-3.06724	0.283053	-0.106245	-0.238796	-0.583609	6.29104	1	-1.25098	-0.438268	-2.63149	5.49716	-4.88526	-1.56131	-0.909511	-0.16446	1.94464	-0.573228	-0.446915	-2.09754	2.62561	-5.0746	-1.36991
2	0.730381	-3.02669	0.700436	-1.11401	-1.01151	1.29598	0.875441	4.73072	-0.128617	0.366244	-0.508311	-1.43582	2.70009	-0.0806492	-0.0280267	-0.316438	-2.04201	-0.785145	2.30617	0.985477	-0.635036	-1.62498	-2.558	-1.13534	1.53257	-1.88852	3.15551	-3.03939	0.0034748	-0.00879663	-0.0187242	-0.986316	6.83021	2	-1.55112	0.0303299	-4.59172	5.06112	-5.56043	-1.46835	-0.862735	-0.170171	1.48864	-0.693702	-0.197663	-2.06421	2.24422	-4.47005	-1.49674
3	0.824428	-3.69473	1.33096	-1.01926	-0.889776	1.18102	0.977249	4.13835	1.64572	0.357993	-0.23262	-1.27655	2.73398	-0.0902452	-0.0226218	-0.31889	-1.37168	-0.479613	1.69956	1.25328	-0.505412	-1.40504	-2.60317	-1.21654	0.109774	-1.6356	3.29466	-2.87657	-0.159169	0.131272	0.0602387	-1.41045	7.13056	3	-1.8796	0.637094	-6.0636	4.71099	-6.13719	-1.29954	-0.997271	-0.20885	0.591269	-0.768624	-0.158708	-2.01231	1.50507	-3.56449	-1.62335
4	0.822804	-4.11946	1.84927	-0.742135	-0.796449	0.902574	1.0131	3.28483	3.71691	0.299061	-0.0297483	-1.15515	2.85821	-0.116777	-0.0629001	-0.295446	-0.577558	0.017036	0.694989	1.3218	-0.312129	-1.16669	-2.64985	-1.26069	-1.25469	-1.10334	3.31888	-2.74371	-0.558504	0.248843	-0.054634	-1.70767	7.03904	4	-2.22037	0.939915	-6.58248	4.52522	-6.74626	-1.07862	-1.23268	-0.268212	-0.439393	-0.734639	-0.187655	-1.95898	1.08572	-2.58769	-1.70476
5	0.755571	-4.17871	2.4233	-0.094751	-0.703595	0.656894	0.997117	2.3772	5.83037	0.252723	0.0617041	-1.04901	2.86836	-0.312426	-0.0727577	-0.226645	0.36389	0.148399	-0.545337	1.40053	-0.0881374	-1.07915	-2.38848	-1.2611	-1.62799	-0.828705	3.1776	-2.57833	-0.77497	0.342581	-0.25167	-1.90002	6.72366	5	-2.75306	0.659673	-6.56641	4.32656	-7.2946	-0.840388	-1.33284	-0.222361	-0.471289	-0.802586	-0.226168	-1.86409	0.806836	-1.78755	-1.78458
6	0.589604	-4.06675	3.21575	0.851007	-0.71667	0.45421	0.98215	1.46629	6.69833	0.333885	0.0980733	-0.928167	2.74648	-0.41494	-0.0400179	-0.113034	1.28316	0.312043	-2.35158	1.20843	0.123299	-0.922065	-1.80491	-1.19714	-1.74166	-0.832251	2.98796	-2.4328	-0.879107	0.422386	-0.266566	-1.87412	6.45752	6	-3.22633	0.286599	-6.26674	4.33975	-7.66594	-0.638957	-1.40826	-0.063174	-0.232973	-0.742437	-0.0622116	-1.76528	0.592606	-1.3169	-1.86136
7	0.395764	-3.90254	3.88369	1.93295	-0.893102	0.315876	0.92883	0.598321	6.68791	0.485516	0.174843	-0.803639	2.85675	-0.613369	0.0716868	0.0211815	1.92173	0.355391	-5.9164	0.938146	0.337349	-1.34381	-1.35643	-1.09845	-2.0794	-0.865195	2.67087	-2.38	-0.803532	0.521453	-0.210096	-1.84084	6.76175	7	-3.49311	0.0509429	-6.05525	4.74639	-7.79043	-0.535403	-1.38915	0.178663	0.476543	-0.732819	0.243119	-1.68863	0.614757	-1.16162	-1.85339
8	0.217784	-3.74339	4.20245	2.28907	-1.0407	0.292148	0.972502	-0.26628	5.63727	0.721253	0.341111	-0.653946	3.29676	-0.943104	0.137211	0.140383	2.46764	0.294315	-8.88921	0.796748	0.579229	-2.02451	-1.31565	-0.885468	-2.64399	-0.804888	2.1898	-2.43731	-0.565292	0.645103	-0.168804	-1.89797	7.3589	8	-3.6506	0.0890152	-5.98161	4.97414	-7.66097	-0.544722	-1.23861	0.407136	0.794529	-0.846964	0.586975	-1.61113	0.910778	-1.20347	-1.8112
9	0.0880166	-3.72973	4.31156	1.91204	-1.04825	0.248753	1.16136	-1.0747	4.79692	0.982232	0.539886	-0.407354	3.43528	-1.04596	0.157713	0.231843	3.02044	0.215964	-10.3878	0.49903	0.819017	-2.58836	-2.01322	-0.671918	-3.10331	-0.800412	1.91195	-2.57354	-0.516747	0.76163	-0.232336	-1.85698	7.02547	9	-3.68671	0.120757	-5.95716	4.78598	-7.26722	-0.574571	-0.643189	0.62983	0.992457	-0.981786	0.663506	-1.60661	1.70033	-1.68223	-1.72645
10	-0.00945805	-3.53902	4.49862	0.68493	-0.848349	0.0272645	1.41163	-1.77024	4.97591	1.18301	0.618281	-0.13957	3.2821	-1.03152	0.202183	0.30572	3.48279	0.448909	-11.6216	-0.0776768	1.00473	-2.82269	-2.68611	-0.531876	-2.82785	-1.41658	1.92935	-2.73821	-0.402347	0.872177	-0.542222	-1.71413	6.25658	10	-3.49988	-0.0356023	-6.17698	4.10003	-6.82011	-0.646741	-0.16956	0.846471	1.20075	-1.30396	0.36757	-1.66924	2.21579	-2.46727	-1.68904
11	-0.120508	-3.3053	4.77436	-0.844952	-0.427001	-0.2023	1.58807	-2.3801	5.34356	1.3881	0.684678	0.0531553	3.2726	-1.03837	0.357583	0.318893	3.99031	0.71704	-12.8315	-0.555135	1.11579	-2.08048	-3.08534	-0.367707	-1.46976	-3.02573	2.03032	-3.01754	-0.343632	0.920275	-0.673191	-1.56992	5.91228	11	-3.24904	-0.31774	-5.93857	3.50469	-6.54967	-0.774573	0.0862433	1.12473	0.882045	-1.77871	0.179628	-1.76871	2.54798	-3.48108	-1.48051
12	-0.263205	-2.99599	5.0987	-1.22063	-0.191787	-0.384613	1.69086	-2.87888	5.30892	1.54266	0.725623	0.245209	3.05642	-1.08122	0.455557	0.230136	4.56931	0.846907	-12.6529	-0.888918	1.28098	-1.77648	-3.61922	-0.228056	0.069174	-4.29181	2.29982	-3.30151	-0.270583	0.88946	-0.777605	-1.24662	6.2248	12	-2.95043	-0.451877	-5.96606	3.01767	-6.60233	-0.942466	-0.219785	1.51199	0.706676	-2.16648	0.124295	-1.81816	2.28369	-4.31839	-1.25026
13	-0.39854	-2.44521	5.29936	-1.54364	-0.0648148	-0.579295	1.79956	-3.25552	4.79079	1.58321	0.730756	0.375542	2.69374	-1.11881	0.556628	0.145718	5.11666	0.83786	-12.4441	-1.12331	1.54239	-2.23742	-3.96765	-0.101734	1.48587	-4.62694	2.78161	-3.53199	0.129398	0.857538	-0.711222	-0.771753	7.49175	13	-2.693	-0.28634	-5.62513	1.93111	-6.68033	-1.1258	-0.894704	1.92159	0.984866	-2.41065	-0.045401	-1.77786	1.47734	-4.78972	-1.0649
14	-0.501818	-1.63949	5.334	-2.52981	-0.0571251	-0.785312	2.07971	-3.62013	4.66814	1.58038	0.757209	0.48433	2.35027	-1.11617	0.640448	0.127042	5.66061	1.14618	-11.53	-1.29254	1.82562	-2.98852	-3.3219	-0.00323865	2.26502	-4.18528	2.83888	-3.83109	0.819497	0.777174	-0.760218	-0.514893	8.68966	14	-2.39418	-0.0985987	-5.95776	0.417468	-6.76749	-1.32833	-1.87503	2.34851	1.14691	-2.66707	-0.206236	-1.6874	0.991088	-4.61863	-0.902838
15	-0.548515	-0.833878	5.35225	-3.15349	-0.0862125	-0.985538	2.31373	-4.05678	4.31733	1.65628	0.820747	0.64722	2.18318	-1.05747	0.590401	0.132233	5.97399	1.84203	-10.1458	-1.41125	2.09667	-3.90689	-2.66254	0.0668555	2.35576	-4.14525	2.5494	-4.02699	1.7365	0.658216	-0.568098	-0.417593	9.72425	15	-2.06742	0.35747	-5.99236	-0.469217	-6.90571	-1.55816	-2.91672	2.73611	1.48923	-2.90248	-0.143786	-1.59945	0.712192	-3.26652	-0.812958
16	-0.490908	0.0169672	5.37594	-3.13076	-0.0428182	-1.33962	2.46161	-4.59064	4.68921	1.67311	0.805686	0.838819	2.17211	-1.02435	0.49335	0.108666	6.06649	2.61324	-7.28452	-1.41645	2.21881	-4.5191	-2.75386	0.138951	2.35323	-4.12256	2.287	-4.03726	2.59597	0.446094	-0.4663	-0.043634	10.5277	16	-1.75693	0.694976	-6.37606	-1.06208	-7.15794	-1.78067	-4.02711	2.97712	2.43157	-2.67693	-0.31512	-1.55445	0.269587	-1.9156	-0.794084
17	-0.412967	1.13309	5.61744	-3.20176	0.168	-1.55645	2.59431	-5.20284	4.96519	1.66081	0.73142	0.894398	2.18879	-0.949697	0.476808	0.0588489	5.97824	3.10827	-5.46122	-1.59461	2.23792	-4.80742	-2.9954	0.207894	2.51884	-3.88879	1.77732	-3.9963	3.68658	0.0212053	-0.346866	0.647675	10.4959	17	-1.43583	0.739285	-9.91392	-1.08372	-7.5985	-1.95336	-5.43967	2.99859	2.80179	-2.17025	-0.732035	-1.56337	0.0928551	-1.04541	-0.693163
18	-0.377328	2.12406	6.19523	-3.43314	0.104064	-1.57628	2.70408	-5.68818	4.45158	1.61887	0.669581	0.843981	1.4541	-0.862303	0.539672	-0.00970711	5.64384	3.95257	-5.03687	-1.48355	2.19113	-4.3493	-3.1789	0.243351	2.08182	-3.46685	1.18011	-3.77714	4.60746	-0.423716	-0.38556	1.22924	9.57335	18	-1.24924	0.332988	-13.8291	-0.875635	-8.13724	-2.08437	-6.2099	2.99085	2.71637	-1.73973	-1.17553	-1.62988	-0.595212	-0.745098	-0.61754
19	-0.36345	2.53913	6.86098	-3.83913	-0.305946	-1.37687	2.86899	-5.62771	3.63842	1.56919	0.672016	0.657073	0.611278	-0.745361	0.642178	-0.0913703	5.02435	4.58988	-4.09821	-1.11198	2.06904	-3.78006	-3.63069	0.259754	1.88975	-3.21073	0.5647	-3.37994	5.14054	-0.757443	-0.303579	1.4518	8.63034	19	-1.13739	-0.0370277	-15.0324	-0.991001	-8.45138	-2.12378	-5.94395	3.21221	2.21984	-1.32964	-1.81808	-1.71309	-1.12127	-0.752773	-0.539526
20	-0.385227	2.59278	7.37587	-5.01151	-0.433135	-1.00979	2.98995	-5.32499	3.94483	1.51124	0.698791	0.33006	0.36487	-0.624575	0.657877	-0.144402	4.29955	4.67866	-3.8508	-0.524118	1.81267	-3.66339	-4.59319	0.293102	1.63361	-3.24704	-0.0303014	-3.01451	5.06626	-0.967689	-0.112931	1.38706	8.16827	20	-1.09243	-0.0931806	-14.4432	-1.30043	-8.56022	-2.16696	-5.47438	3.02756	1.90294	-1.05792	-2.29284	-1.83383	-1.54619	-1.07851	-0.56428
21	-0.384384	2.91101	7.85496	-5.92302	-0.188332	-0.56115	3.11133	-4.65417	3.46905	1.36027	0.671629	-0.0824422	-0.130561	-0.591132	0.542031	-0.198495	3.38965	4.66333	-2.87923	-0.0450575	1.59243	-3.63911	-5.16087	0.385574	0.46417	-3.16625	-0.263247	-2.62891	4.87477	-1.06935	0.192233	1.30729	7.10882	21	-0.932058	0.00335026	-13.3498	-1.77226	-8.85299	-2.12735	-4.91527	2.08064	2.34689	-0.665442	-2.78641	-2.02773	-2.02664	-1.27023	-0.424367
22	-0.334894	3.36024	8.12751	-6.13035	0.0770329	-0.0778883	3.18855	-3.50519	3.03613	1.16725	0.683236	-0.345411	-0.566247	-0.834565	0.367159	-0.238813	2.47934	4.97462	-2.55142	0.0642243	1.46934	-3.57937	-4.72596	0.433685	-0.920383	-2.43161	-0.476412	-2.47541	4.9193	-1.1454	0.642436	1.17222	5.73638	22	-0.660304	0.0849036	-11.9535	-2.03456	-9.67788	-2.10214	-4.5251	1.04985	2.66956	-0.296496	-3.10561	-2.22345	-2.99871	-1.08309	-0.143607
23	-0.324146	3.8973	8.0577	-5.66734	0.239055	0.536557	3.06779	-2.35927	1.7129	1.00134	0.704247	-0.624712	-1.02392	-1.17087	0.267409	-0.29243	1.91743	4.29032	-2.65745	-0.146958	1.35027	-3.17176	-3.97238	0.499722	-1.71115	-1.24925	-0.884182	-2.64755	4.99102	-1.25397	1.54033	0.90848	4.19492	23	-0.408545	-0.12647	-11.4759	-3.38012	-10.1605	-1.98225	-3.76518	0.0606336	2.03218	-0.340662	-3.44805	-2.41321	-3.22167	-0.931692	0.041938
24	-0.319158	4.76836	7.86938	-5.09731	0.379955	0.997889	2.87315	-1.16047	1.71116	0.811194	0.792994	-0.966851	-1.01202	-1.56556	0.209352	-0.362267	1.61874	3.15599	-2.05663	-0.511743	1.17439	-2.7396	-3.59963	0.508083	-1.65437	-0.0381244	-0.89955	-3.03501	4.66117	-1.34309	3.04197	0.744316	2.96107	24	-0.363894	-0.324532	-11.3269	-4.03287	-10.5112	-1.66354	-2.7696	-0.602748	1.06739	-0.335688	-3.60397	-2.71619	-3.48658	-0.895547	0.338726
25	-0.244395	5.67428	7.61696	-4.06962	0.457159	1.31717	2.60829	0.163327	1.58096	0.748078	0.802716	-1.25452	-0.689521	-2.12361	0.13603	-0.485568	1.49565	2.72403	-1.54116	-0.840576	1.08551	-2.49604	-3.74349	0.371908	-1.89716	1.39366	-0.567663	-3.34775	4.47646	-1.53205	4.20814	0.473964	2.81132	25	-0.463422	-0.0884985	-10.7102	-3.67821	-10.4531	-1.42764	-1.89807	-1.20038	2.07894	-0.173632	-4.08735	-3.05077	-4.37214	-1.22597	0.540609
26	-0.140142	6.08183	7.08842	-3.28413	0.736541	1.57255	2.43403	1.55665	1.70478	0.714484	0.857809	-1.51296	0.317717	-2.4974	-0.000382489	-0.634145	1.5449	2.86025	-1.75637	-1.40005	1.03306	-2.21496	-4.391	0.120647	-2.09549	2.17474	-0.567667	-3.60218	4.76811	-1.75237	3.95172	-0.474015	2.60616	26	-0.86304	0.71429	-10.5236	-3.67471	-9.77626	-1.25621	-1.2738	-1.52517	2.06345	0.0461584	-4.3401	-3.37721	-5.05681	-2.03863	0.768496
27	-0.00759528	5.82645	6.58345	-2.0193	1.19904	1.7596	2.39449	3.00939	1.22511	0.706972	1.01664	-1.63996	1.82853	-2.7737	-0.231916	-0.767847	1.5954	3.04266	-1.88117	-1.50549	0.891916	-1.74539	-3.92547	-0.184848	-1.75969	2.24538	-0.750213	-4.0914	4.7465	-1.98429	3.31379	-1.11507	1.71919	27	-1.15697	1.78874	-10.7756	-3.63102	-9.44055	-1.10269	-1.03162	-1.57324	2.31372	0.0313356	-4.51943	-3.63989	-4.88379	-2.60369	1.08886
28	0.220394	5.59448	6.3036	-0.662105	1.52191	1.90651	2.44864	4.28519	1.06351	0.710535	1.16734	-1.74977	3.05087	-2.9816	-0.518701	-0.844256	1.62389	2.98373	-2.41813	-0.883721	0.673156	-1.48588	-3.78721	-0.671778	-1.53113	0.304515	-0.91339	-5.03989	4.39532	-2.12008	2.27745	-1.39052	1.17451	28	-1.2381	2.52652	-11.5668	-2.60845	-9.08612	-0.884146	-0.933554	-1.40004	2.16202	-0.173918	-4.731	-3.7702	-4.25983	-2.73566	1.28468
29	0.472025	5.18043	6.32026	0.035209	1.46751	2.08934	2.61641	5.24517	1.50168	0.753548	1.3235	-1.84124	4.51441	-3.20341	-0.855127	-0.84232	1.64236	2.63602	-2.60428	-0.265975	0.451029	-0.752203	-4.9201	-1.30754	-0.701565	-0.430966	-0.740029	-6.12958	4.09611	-2.01885	0.981271	-1.51781	1.11733	29	-1.41158	3.00324	-12.5357	-1.2715	-8.48358	-0.560968	-0.908404	-0.976105	2.30304	-0.911718	-4.81398	-3.77489	-3.1271	-2.78741	1.38107
30	0.711733	4.43206	6.55524	0.732537	1.62862	2.055	2.67111	6.23837	1.48756	0.883388	1.54063	-1.92893	5.66734	-3.53065	-1.04087	-0.84264	1.63295	2.12991	-3.24288	-0.0188523	0.285694	-0.51442	-5.0754	-1.86339	0.928492	-0.78509	-0.443423	-6.73927	3.76571	-1.82578	0.0992352	-0.859987	1.25057	30	-1.7351	3.65235	-14.2875	-0.549372	-7.71847	-0.0418773	-0.966403	-0.400518	1.94854	-1.35306	-4.48274	-3.75219	-1.99566	-2.96846	1.46807
31	0.943169	3.62961	7.25102	1.36957	1.87796	2.12778	2.68646	7.52397	2.46226	0.965794	1.79698	-2.02702	5.87742	-3.80212	-1.14862	-0.825122	1.66122	1.556	-4.32261	0.220326	0.197159	-0.461891	-5.2199	-2.30848	2.01618	-0.963435	-0.055465	-6.83127	3.67554	-1.66041	0.0763202	-0.490822	1.95412	31	-2.06416	4.63654	-16.4034	-0.890715	-6.7696	0.398155	-0.904364	-0.554246	1.13375	-1.61013	-4.43876	-3.73175	-0.391856	-3.21921	1.76081
32	1.09672	3.05658	7.62789	2.20645	2.30165	2.10072	2.72388	8.50099	2.37213	1.01115	2.04256	-2.21265	5.70772	-3.9208	-1.24492	-0.776925	1.75652	1.54417	-4.43817	0.110428	0.171556	-0.359099	-4.43953	-2.57121	2.15524	-1.40333	0.548502	-6.7861	4.09085	-1.42984	0.117575	-0.107582	3.01128	32	-2.47083	5.26328	-17.4437	0.120664	-5.81013	0.903471	-0.723498	-1.19843	0.638037	-1.79129	-4.45546	-3.76328	1.10283	-3.34178	1.98821
33	1.24463	2.68392	8.02366	3.32889	2.55299	2.0494	2.7351	8.68725	2.42801	0.996148	2.27757	-2.25965	5.2602	-4.16625	-1.40905	-0.650214	1.64529	1.38045	-5.24748	0.257128	0.252236	-0.501919	-2.60719	-2.65582	1.6458	-2.11069	1.46967	-6.48651	4.9812	-1.20066	-0.252792	-0.020487	4.60011	33	-2.7736	4.92928	-17.8856	1.71231	-4.36021	1.41494	-0.893835	-1.68777	0.813539	-1.65609	-4.47788	-3.78506	1.94053	-3.11668	2.0393
34	1.35445	2.21323	8.55129	4.11686	2.95935	2.01888	2.82256	8.17813	1.88812	0.920334	2.57673	-2.11079	4.87497	-4.42122	-1.51204	-0.493254	1.35743	1.69672	-5.38861	0.688501	0.272776	-0.646154	-1.06173	-2.58433	0.827566	-2.35426	2.36662	-6.26553	5.43058	-0.952498	-0.496523	0.217827	5.01459	34	-3.02379	3.34503	-18.0424	3.19189	-2.44267	1.74905	-1.4882	-2.09885	1.63483	-1.41241	-4.30868	-3.69829	2.23146	-2.73763	1.73141
35	1.38676	1.74839	8.68976	4.52759	3.25705	2.15894	2.91011	7.39294	2.52256	0.854244	2.90073	-1.93083	4.47546	-4.70454	-1.56991	-0.347324	0.91021	1.95128	-5.37022	0.656317	0.215917	-0.975372	0.16454	-2.38086	0.0511863	-1.92548	2.83362	-6.06523	5.67489	-0.668933	-0.435669	0.456431	5.14372	35	-3.18582	1.34086	-17.48	5.10143	-0.475404	1.9338	-1.8539	-1.6008	2.78339	-0.844946	-4.04617	-3.49475	2.81414	-2.36315	1.31636
36	1.52543	1.33567	8.98607	4.82118	3.42715	2.31786	2.82681	6.72631	1.14595	0.788622	3.09876	-1.63803	4.74236	-4.84309	-1.54513	-0.162845	0.647434	1.78413	-4.90177	0.820539	0.150278	-1.27098	2.07373	-2.04346	-0.535687	-0.703768	3.09904	-5.90375	5.53113	-0.372765	-0.14791	0.848919	5.11784	36	-3.51513	-0.671201	-15.7371	7.12572	1.05318	2.00494	-2.23804	-0.61523	3.64126	-0.272827	-3.64463	-3.24166	3.02773	-1.93689	0.894084
37	1.64571	0.90723	9.42339	5.21689	3.6746	2.45581	2.75219	6.01893	-0.571001	0.777892	3.20621	-1.28148	4.92515	-4.82616	-1.52696	0.0142659	0.561111	1.30673	-4.61741	0.989666	0.162072	-1.09155	2.95645	-1.76074	-1.34066	0.514312	3.15781	-5.75567	5.03608	-0.0799907	0.323913	1.57925	5.09318	37	-4.05198	-2.32048	-13.6892	8.58039	2.28182	1.95475	-1.9312	0.133533	5.09995	0.294503	-2.95763	-3.09139	2.47675	-1.43272	0.702276
38	1.65615	0.579013	10.0065	5.11137	3.40612	2.73055	2.55819	5.00002	-2.24424	0.788776	3.33571	-1.39001	5.27869	-4.81034	-1.51474	0.196334	0.435605	0.472577	-4.92743	1.29304	0.303779	-0.959698	3.53265	-1.4143	-1.65903	0.603435	3.11303	-5.64814	4.06607	0.0897689	0.75941	2.19021	5.21215	38	-4.30207	-3.44475	-11.9531	9.92466	3.02861	1.80875	-1.49105	0.81391	6.45445	0.514165	-1.96995	-2.9333	2.10902	-0.899095	0.634757
39	1.60637	0.101054	10.4616	5.19073	2.91888	3.07426	2.42094	3.71342	-2.67151	0.761214	3.48673	-1.54392	5.62179	-4.78791	-1.44074	0.279313	0.443912	-0.293738	-4.27499	1.25615	0.598678	-1.13764	4.07899	-0.895312	-1.86855	0.773369	2.81847	-5.70291	2.36593	0.14256	1.17669	2.44051	5.30359	39	-4.44412	-4.41341	-9.88143	10.2549	3.53674	1.68801	-1.00173	1.44236	7.24233	0.556922	-1.07181	-2.62295	1.05173	-0.176845	0.517299
40	1.49671	-0.30831	10.4076	5.05911	2.63729	3.25693	2.70981	2.42014	-2.75589	0.755761	3.5747	-1.65963	5.71999	-4.68074	-1.37245	0.255418	0.389137	-0.589879	-4.80257	0.922688	0.957247	-1.18644	5.40054	-0.413571	-2.22376	1.32147	2.70312	-5.94725	1.1432	0.0215796	1.78053	2.19693	5.26455	40	-4.49228	-5.38043	-7.17539	9.41135	3.62782	1.47787	-0.29554	1.9404	7.55791	0.347274	-0.50047	-2.07322	0.541595	0.830977	0.388151
41	1.32575	-0.574445	10.136	4.43848	2.5232	3.31045	3.11394	1.34387	-2.57017	0.693805	3.61515	-1.62737	5.35764	-4.73323	-1.25591	0.168056	0.396618	-0.584958	-5.48192	0.345773	1.31541	-1.33714	6.03387	0.0448006	-2.06389	1.95322	3.27974	-6.06223	0.785608	-0.174334	1.86309	1.88492	5.99246	41	-4.30789	-6.35817	-4.28747	8.96136	3.00579	1.26673	0.467811	2.54712	7.60706	-0.17461	0.0909906	-1.55792	0.163076	1.79807	0.260193
42	1.15634	-0.805839	9.73922	3.6829	2.71348	3.38759	3.39916	0.389577	-2.21963	0.767004	3.61195	-1.40836	5.38914	-4.81805	-1.07971	0.0618735	0.543538	-0.143148	-5.69138	0.433641	1.72263	-1.10915	6.27973	0.509946	-2.60311	2.64565	3.93679	-5.72134	0.644886	-0.261299	1.56338	1.81832	7.73901	42	-4.19992	-7.06094	-2.04135	7.55712	2.42853	1.09573	1.35513	3.02628	8.01822	-0.530196	0.53963	-1.25446	-0.0618611	2.41736	-0.00535285
43	0.998122	-1.07488	9.7017	3.50521	2.90597	3.47013	3.48035	-0.544594	-1.98697	0.881521	3.64289	-0.999819	6.12947	-5.01452	-0.87458	0.00102782	0.948529	0.170467	-6.27182	0.93823	2.02516	-1.00985	5.78788	1.03526	-3.94068	3.72069	4.07501	-5.61496	0.369827	-0.267594	1.7784	2.13237	9.36899	43	-4.06367	-7.32743	-0.346244	4.9815	2.11917	1.07334	2.10283	3.36859	6.68406	-0.807272	0.74003	-0.86968	-0.145236	2.43753	-0.229714
44	0.86179	-1.4176	9.69881	3.72673	2.73775	3.56289	3.05818	-1.59658	-0.584156	1.07073	3.72442	-0.509478	6.79924	-5.0007	-0.683519	0.00189814	1.53145	0.131544	-5.71732	1.06133	2.16198	-0.731121	4.23204	1.53853	-4.29501	4.67239	3.98698	-5.64313	0.451403	-0.1693	1.68088	2.57528	10.2637	44	-4.00555	-7.37246	0.197735	3.48749	1.80244	0.969754	2.24294	3.21653	4.92203	-1.01103	0.935905	-0.397665	-0.21131	2.21795	-0.316729
45	0.819498	-1.8991	9.50931	3.83006	2.5322	3.65951	2.62738	-2.50223	0.632274	1.30548	3.80625	-0.273643	6.84173	-4.86076	-0.473163	0.0517417	2.19768	0.397191	-4.87646	1.58708	2.24781	-0.475651	2.5505	2.02798	-4.02671	4.92585	3.44972	-5.82464	0.546025	-0.12909	1.24378	3.02239	10.6658	45	-3.7201	-7.36558	0.664436	3.32814	1.16081	0.986657	1.86478	2.57105	3.99625	-1.12061	1.2291	0.0107748	-0.687991	2.03722	-0.457757
46	0.774483	-2.47512	9.44253	3.96867	2.05097	3.74153	2.26385	-3.23433	0.371598	1.46339	3.88557	-0.342391	6.67562	-4.87423	-0.0481076	0.102185	2.79567	0.877932	-4.37036	1.61239	2.35925	-0.246872	2.1892	2.56938	-3.97966	4.4646	2.75931	-6.04404	1.07441	-0.0737324	0.327785	3.34459	10.8658	46	-3.18837	-7.46902	1.69188	3.51318	0.178345	1.11218	1.23896	1.88357	2.66186	-1.06737	1.49968	0.349011	-0.854579	2.19697	-0.757434
47	0.730885	-3.06001	9.87712	4.41391	1.37907	3.92587	2.11955	-3.98306	-0.35202	1.56728	3.99859	-0.664632	6.56961	-4.79733	0.339189	0.166357	3.24797	1.13354	-4.08922	1.35195	2.3756	-0.0497587	0.788029	2.971	-4.23594	3.81262	2.14544	-6.23071	1.74077	-0.0670377	-0.265832	3.26489	11.3112	47	-2.86669	-7.60051	3.31181	3.39767	-0.855447	1.08229	0.680679	1.3528	3.50852	-0.832982	1.66419	0.548224	-0.672561	2.63672	-1.02597
48	0.759796	-3.26456	10.4033	4.91106	0.804521	4.08175	2.17227	-4.62314	-0.803622	1.69481	4.0538	-0.946733	6.49871	-4.68647	0.679877	0.211451	3.67734	1.04165	-3.87964	1.12272	2.37424	0.0642551	-0.674347	3.37569	-4.14678	3.6364	1.90611	-6.0616	2.01786	-0.136538	-0.492769	3.09735	11.8847	48	-2.76828	-7.55036	4.69534	3.66765	-1.77888	1.10284	0.559777	1.28294	5.99151	-0.742474	1.50876	0.5288	-0.171901	2.80416	-1.16903
49	0.768898	-3.33338	11.1802	5.4045	0.396372	4.10794	2.14506	-5.0623	-0.539791	1.76627	3.96442	-1.20443	6.07384	-4.61356	0.948709	0.250194	4.08507	0.901052	-2.47467	0.549871	2.52682	0.605646	-2.13998	3.65317	-3.80332	3.04432	1.95543	-5.51523	2.26498	-0.344377	-0.878292	2.96851	11.7321	49	-2.9981	-7.17198	5.55099	3.1048	-2.59581	1.09221	1.35691	1.67869	8.27961	-1.08727	1.3988	0.353646	0.0330489	3.2262	-1.42792
50	0.766885	-3.24095	11.8447	5.77519	0.265869	4.0322	2.00837	-5.2894	0.770856	1.7842	3.74903	-1.49732	5.76641	-4.61712	1.15544	0.300027	4.33899	1.09034	-2.92789	0.0477308	2.86964	0.700537	-3.38736	3.91488	-3.82566	2.21787	1.72665	-4.87721	2.71334	-0.35924	-1.00265	3.05949	11.3683	50	-3.27916	-6.62023	4.80465	1.74527	-3.34161	1.00168	2.06451	2.07974	7.87398	-1.88119	1.07866	0.227161	0.155428	4.25214	-1.5176
51	0.701279	-3.2482	11.9801	5.57917	0.423154	3.92054	1.93651	-5.38909	1.98023	1.70588	3.42675	-1.63709	5.52971	-4.8232	1.14789	0.427072	4.62463	1.07975	-3.16979	-0.103825	3.1098	0.949152	-4.17485	4.05279	-4.48074	1.68354	1.08007	-4.39545	2.83589	-0.356634	-0.904495	3.05648	11.5652	51	-3.51417	-5.72698	4.44744	0.926072	-3.92935	0.961235	2.47071	1.97027	7.2412	-2.93562	0.641396	0.0453341	0.0856611	5.27682	-1.5236
52	0.640009	-3.27009	11.7883	5.24903	0.303603	3.81197	1.94963	-5.27432	2.14539	1.61626	3.09776	-1.5271	5.54234	-5.36054	1.08014	0.599133	5.09187	1.04452	-3.93766	0.226515	3.22087	1.24198	-5.16968	3.9195	-5.61186	0.370715	0.741948	-4.10085	2.56504	-0.586158	-1.05232	2.92866	11.5514	52	-3.86721	-4.94559	3.48787	0.629727	-4.61247	0.927949	2.53044	1.90431	6.68002	-3.69046	0.286596	-0.163154	-0.878779	6.3582	-1.51354
53	0.569724	-3.29887	11.3156	5.11563	0.351266	3.69041	1.94168	-5.0362	2.53486	1.4833	2.73843	-1.51616	5.56231	-5.8347	1.00238	0.787295	5.37359	1.51846	-4.13137	0.454919	3.32403	1.2366	-5.89022	3.74683	-7.10891	-0.00466755	0.740981	-3.84136	1.95136	-0.886687	-0.341346	2.80627	11.815	53	-4.19376	-4.44288	3.2535	0.740379	-5.34201	0.858919	2.42917	1.6443	4.69677	-3.77371	-0.187926	-0.243084	-2.4307	7.08538	-1.45462
54	0.476943	-3.27344	10.6824	5.03718	0.971112	3.6653	1.934	-4.76511	2.39426	1.31648	2.36307	-1.50243	5.49922	-5.89981	0.85976	0.950698	5.5083	1.64618	-4.77039	0.581128	3.43233	1.17535	-6.36019	3.61428	-8.02705	0.556824	0.484816	-3.52563	1.89207	-1.08043	0.446272	2.58182	12.7572	54	-4.48794	-4.21267	3.33924	0.669346	-6.48877	0.80828	2.21385	1.03801	4.28452	-3.57026	-0.689612	-0.23637	-3.29299	7.13193	-1.33489
55	0.401217	-3.02299	10.1891	4.81346	1.5709	3.70206	1.94074	-4.48393	1.91426	1.13729	2.04697	-1.44492	5.3975	-5.57914	0.575168	1.0809	5.55112	2.17697	-5.54858	0.820067	3.4928	0.698391	-6.52997	3.26211	-8.25593	0.802748	0.318285	-3.33089	1.89789	-1.38615	0.951052	2.35529	13.7828	55	-4.89762	-4.18797	2.98485	0.161521	-7.40746	0.673458	1.91275	0.159112	3.92025	-3.33896	-1.30959	-0.213289	-3.68704	7.16736	-1.23106
56	0.302499	-2.66234	9.63405	4.57474	1.66023	3.67581	1.84188	-4.17923	0.899259	1.01565	1.93765	-1.48624	5.10059	-5.42442	0.379075	1.18198	5.60777	2.8788	-5.29676	1.58127	3.5696	0.145649	-6.99825	2.72944	-7.95244	1.36213	-0.00833752	-3.28879	1.78954	-1.62709	1.31309	2.24739	13.9364	56	-5.09333	-4.26252	2.49712	-0.06736	-7.76753	0.673027	2.24919	-0.668933	4.01222	-2.9596	-2.07143	-0.216425	-4.30492	7.40944	-1.07085
57	0.224413	-2.26481	9.43907	4.49517	1.79571	3.65323	1.61358	-3.79135	-0.820304	0.927541	1.99243	-1.56157	5.13823	-5.6671	0.279605	1.22646	5.62445	3.43679	-5.62787	1.75521	3.70824	-0.0959779	-6.99344	2.1492	-7.48766	1.65341	-0.558333	-3.44375	1.58043	-1.87116	0.444044	2.2437	12.9421	57	-5.35081	-3.93644	1.95291	-1.08209	-7.35505	0.613033	2.31391	-2.0132	4.85597	-2.99883	-2.4936	-0.383674	-4.49883	8.03554	-0.89847
58	0.106173	-1.88013	9.60391	3.87681	2.01902	3.6253	1.41722	-3.36645	-2.71112	0.720014	2.06608	-1.804	5.22101	-5.96011	0.171526	1.1968	5.60521	3.31458	-6.02698	0.753692	3.82491	-0.462849	-6.08315	1.59811	-6.3409	1.41765	-0.59987	-3.74206	1.42241	-1.90065	-0.371438	2.46884	11.543	58	-5.44983	-3.1975	0.909375	-2.26965	-6.4452	0.584527	1.80212	-3.10461	5.21869	-3.0814	-2.71634	-0.640419	-4.08273	8.71239	-0.884063
59	0.00261037	-1.45436	9.72742	2.6023	2.6619	3.70706	1.21823	-2.94806	-2.88376	0.483304	2.07119	-1.94788	5.1164	-6.41945	0.0518175	1.17613	5.59265	2.75338	-4.87737	-0.18617	3.72019	-0.738932	-5.33653	1.22003	-5.39952	1.3775	0.098662	-4.14174	0.846253	-1.7147	-0.840033	2.84361	10.1611	59	-5.35609	-2.33579	-0.957882	-3.38736	-4.09899	0.463929	1.54717	-3.32805	6.16904	-2.89611	-3.07347	-0.764497	-3.40448	9.19767	-0.904837
60	-0.0927018	-1.11902	9.72639	2.26172	3.24952	3.81937	1.13772	-2.52114	-2.41081	0.271949	1.94884	-1.88966	4.88143	-6.9061	-0.064994	1.14274	5.48601	2.31642	-4.58143	-0.151496	3.53709	-0.309824	-5.54672	0.98162	-3.88308	1.18741	0.795007	-4.34509	-0.210271	-1.40287	-1.3368	2.75118	8.67529	60	-4.94047	-1.71835	-2.42589	-4.32964	-1.61101	0.547673	1.1883	-3.78778	5.23355	-2.1439	-3.61082	-1.0633	-3.35318	9.40308	-0.864711
61	-0.252282	-0.844398	9.53265	2.24829	3.62214	3.77288	1.15127	-2.06593	-1.93954	0.127182	1.74834	-1.68443	4.7248	-7.52942	-0.267777	1.14999	5.40327	1.7217	-3.81367	0.458568	3.3198	0.0604223	-6.16177	0.716775	-2.07962	0.593515	0.933192	-4.4182	-1.1921	-1.09432	-1.28096	2.62169	7.3013	61	-4.36251	-0.827233	-2.82841	-4.19893	1.32942	0.480621	0.786278	-4.69504	2.90752	-1.93974	-3.83887	-1.58403	-3.46136	9.3846	-0.636576
62	-0.44473	-0.50043	9.26453	2.51039	3.76614	3.60999	1.41325	-1.55866	-0.638856	0.0678917	1.49412	-1.60758	4.78509	-7.84073	-0.383244	1.22029	5.30302	1.31258	-3.29593	0.626386	3.19001	-0.0584163	-6.64925	0.383035	-0.491717	0.2258	0.587136	-4.27073	-2.16406	-0.841666	-1.09523	2.33275	5.75299	62	-3.92895	-0.304392	-2.86669	-3.52925	3.31909	0.443007	1.0736	-5.58526	0.962172	-1.89125	-4.00383	-2.24986	-3.4098	8.89889	-0.42161
63	-0.429867	-0.341679	9.0411	2.70368	3.98002	3.40849	1.64375	-1.11275	-0.498664	0.120155	1.26315	-1.54273	5.23166	-8.1687	-0.414853	1.35416	5.24085	0.776173	-3.212	0.566896	3.0746	-0.470342	-7.43046	0.0406802	0.641296	0.89641	0.731344	-4.03422	-2.83814	-0.815895	-0.789052	2.03887	4.66401	63	-3.74493	-0.35138	-3.34158	-3.38251	4.80906	0.528083	1.54774	-5.65208	-1.70993	-1.58645	-4.10579	-2.75219	-3.83653	8.75202	-0.275391
64	-0.119093	-0.176837	8.75026	2.63771	3.74185	3.24502	1.82586	-0.631209	-0.921253	0.226979	1.04256	-1.30118	5.64513	-8.68613	-0.515626	1.47642	5.06075	0.869453	-3.09917	0.721953	2.94722	-0.616116	-7.3559	-0.213592	1.34937	1.20602	1.09624	-3.90888	-3.16926	-0.847941	-0.682293	2.287	4.34744	64	-3.62027	-1.03685	-3.74232	-2.54445	5.8472	0.532146	1.54202	-5.53994	-4.78012	-1.50302	-4.30958	-2.98096	-4.20564	8.41497	-0.0329311
65	0.1908	0.0192922	8.26948	2.83003	3.30043	3.00143	1.9987	-0.237518	-1.47859	0.401336	0.891092	-1.02065	5.72077	-9.09358	-0.508213	1.55046	5.00631	1.1068	-2.68566	0.825254	2.73827	-0.566494	-6.69271	-0.324741	2.24745	0.70781	1.67759	-3.70975	-3.2676	-0.897969	-1.38435	2.63926	4.20635	65	-3.50944	-1.79711	-3.98805	-1.80658	6.09417	0.558533	0.992955	-6.04529	-6.15797	-1.88101	-4.41652	-2.67632	-4.25311	8.09169	0.176727
66	0.401623	0.302625	7.70024	3.22806	2.93741	2.84328	2.04065	0.0672701	-1.15007	0.578283	0.747389	-0.65001	5.62726	-9.50706	-0.532814	1.56099	5.06421	0.987371	-2.48976	0.384129	2.55654	-0.693122	-5.05565	-0.265522	2.59593	0.0432483	2.10371	-3.57578	-2.8938	-0.86493	-1.68726	3.0625	3.63812	66	-3.32305	-2.46769	-4.35814	-2.46589	5.80575	0.61986	0.90519	-6.53422	-5.45968	-2.23771	-4.32709	-2.02428	-3.41371	6.8119	0.218628
67	0.502306	0.482235	7.15506	3.38799	2.86139	2.66572	2.17371	0.564789	-1.13424	0.685797	0.60031	-0.297638	5.76761	-9.94343	-0.482709	1.47546	5.21328	0.698752	-2.2497	0.295364	2.50177	-0.446241	-2.65554	-0.0844885	2.40261	-0.203808	2.21658	-3.43803	-2.22535	-0.776601	-1.98732	3.5963	3.89086	67	-3.1226	-2.61945	-4.99487	-1.28994	5.00927	0.583043	0.564158	-6.7146	-3.7071	-2.48545	-4.13551	-1.71359	-2.77638	5.35146	0.21073
68	0.509335	0.657189	6.53383	2.8891	2.89163	2.47251	2.20296	1.13258	-1.29556	0.769289	0.507118	-0.123831	6.51711	-10.1893	-0.425272	1.33519	5.21115	0.433629	-1.38802	-0.0572476	2.52536	-0.482936	-0.838607	0.209497	2.0651	-0.262933	2.51059	-3.4606	-1.96165	-0.753138	-2.44182	4.12134	4.47856	68	-3.12523	-2.6677	-5.28354	0.388876	2.74247	0.502179	-0.0414503	-6.52007	-3.04962	-2.41242	-4.34936	-1.69159	-2.31511	4.43268	0.238185
69	0.485821	0.722998	6.05683	2.37596	2.68452	2.31967	2.13414	1.65769	-1.25842	0.885485	0.526698	-0.0674362	7.14732	-10.4632	-0.32816	1.21775	5.09408	0.874738	-0.999955	-0.387713	2.57672	-0.310053	0.801967	0.327292	1.49854	0.237666	2.61857	-3.45802	-1.45326	-0.819846	-2.16482	4.76205	5.17872	69	-3.03846	-3.2048	-5.27216	0.937305	-0.311241	0.421934	-0.290338	-6.36263	-2.77411	-2.30554	-4.57499	-1.71019	-0.951439	3.8061	0.264653
70	0.525961	0.67607	5.60886	2.44471	2.66047	2.21021	2.12664	2.29482	-2.29581	1.00427	0.55009	0.292391	7.35423	-10.4416	-0.2074	1.12209	4.92742	1.27507	-0.538444	-0.323704	2.60835	-0.187188	2.66509	0.446329	-0.294225	1.11078	2.56638	-3.61067	-0.805517	-0.844959	-1.79711	5.23958	6.07598	70	-2.41789	-3.85327	-5.30993	0.290848	-3.60119	0.335125	-0.727395	-6.20895	-2.98139	-2.16993	-4.68258	-1.98372	1.36408	3.37845	0.168838
71	0.62492	0.71869	5.21825	2.69185	2.2504	2.03723	2.18392	2.90707	-2.84941	1.16985	0.547653	0.781769	7.51111	-10.1643	-0.233233	1.02735	4.68672	0.795004	-1.06837	-0.267468	2.75141	0.15694	4.17572	0.492106	-1.91872	1.92358	2.63394	-4.09702	-0.307558	-0.742019	-1.49188	5.34829	6.54802	71	-1.07087	-3.81875	-5.2583	0.765133	-6.82697	0.433046	-1.34192	-5.76496	-3.61973	-2.41438	-5.04954	-2.23652	2.99983	3.82125	0.247781
72	0.706792	0.724435	4.83039	2.67389	1.97187	1.80748	2.01293	3.35172	-2.21986	1.41995	0.43104	1.01344	7.69094	-9.99063	-0.241129	0.90151	4.50084	0.0443953	-1.99378	0.241421	3.04061	0.114368	5.29188	0.384618	-2.55383	2.94892	2.65577	-4.57834	0.340641	-0.745027	-0.930525	5.2558	6.86026	72	0.383504	-3.61093	-5.2142	1.52138	-8.43204	0.535201	-2.29685	-5.219	-4.16461	-3.07659	-5.52065	-2.1885	3.19136	4.0591	0.409463
73	0.835837	0.773752	4.15709	2.57793	1.51574	1.57628	1.77475	3.74317	-2.50163	1.69787	0.261122	0.953434	7.66232	-9.81272	-0.169137	0.732035	4.40257	-0.0760392	-2.8139	1.01172	3.4284	-0.0493542	5.50362	0.315607	-3.5112	3.30597	2.31224	-4.84794	1.36608	-0.864103	-0.72102	4.92818	7.21706	73	1.50324	-3.48844	-5.01096	1.94202	-9.16301	0.682441	-2.74081	-5.22152	-3.05125	-4.16051	-6.33523	-2.1379	2.77943	4.2161	0.662575
74	0.9702	0.98171	3.78149	2.77358	1.46157	1.42952	1.75565	4.31634	-3.04061	1.90037	0.21287	0.713352	7.61185	-9.54961	-0.184163	0.537291	4.36032	-0.401538	-3.38319	1.898	3.86091	-0.0619653	5.42425	0.269891	-4.65954	3.35214	2.5044	-5.1017	2.08965	-1.01686	-0.509067	4.78183	7.56664	74	2.17615	-2.83823	-4.94327	2.06354	-8.76346	0.867716	-2.65672	-5.19852	-1.85899	-5.11311	-7.16554	-2.20128	2.89368	4.25005	0.998892
75	1.10436	1.26186	4.19023	3.0333	1.45121	1.48382	1.65507	4.93948	-2.60839	1.99345	0.290029	0.785119	7.51738	-9.31288	-0.234748	0.454393	4.28549	-1.02449	-2.5699	2.36649	4.1476	-0.140942	4.52042	0.273301	-5.34962	3.44639	2.60953	-5.27266	3.39212	-1.3286	-0.403042	4.40212	7.85766	75	2.30112	-2.38035	-4.9389	2.56764	-7.78512	0.896423	-2.29484	-5.33746	-1.5836	-5.58689	-7.56683	-2.53767	2.9657	4.63376	1.41624
76	1.22901	1.5914	4.50727	3.59453	1.78861	1.58938	1.44315	5.60624	-2.57536	2.10106	0.438543	1.23822	7.68663	-9.23991	-0.277235	0.648016	4.09452	-1.17036	-1.93484	3.04269	4.16793	-0.405434	3.58863	0.657879	-5.10224	3.61724	2.26003	-5.42098	4.18375	-1.69028	-0.239009	4.0053	8.46626	76	2.48908	-2.31426	-4.95658	2.4874	-6.89701	0.976411	-1.92007	-4.79123	-2.03022	-5.98731	-7.49624	-3.01363	2.65672	5.17147	1.72937
77	1.39688	1.9213	4.59202	3.98071	2.1327	1.6743	1.31612	6.36195	-2.26818	2.22767	0.551333	1.89601	7.82724	-9.39231	-0.33063	0.842966	3.92314	-1.62556	-1.45816	3.22769	3.9321	-0.32659	2.65126	1.04424	-3.94039	3.90151	2.15266	-5.43667	4.39649	-2.02786	-0.169739	3.62342	9.27104	77	2.55787	-2.89272	-5.06576	2.25361	-4.91943	0.970115	-1.50468	-4.01798	-2.07056	-5.74056	-7.05826	-3.47927	2.32581	5.9328	1.9735
78	1.47431	2.14691	4.37552	3.98197	2.21441	1.57589	1.32607	6.84206	-2.95333	2.34805	0.543281	2.43214	8.24289	-9.48065	-0.38896	0.911245	3.66482	-1.33736	-1.01797	3.51357	3.62226	0.00334327	1.93045	1.26927	-2.57534	3.95933	2.25908	-5.11136	4.21616	-2.19731	-0.0885199	3.41951	10.1756	78	2.37865	-4.02792	-5.77028	2.33876	-2.5782	0.957589	-0.95925	-3.38206	-2.22936	-5.16319	-6.57366	-3.92443	2.23514	7.0715	2.2135
79	1.56658	2.2088	3.96939	3.97117	2.27692	1.47985	1.5069	7.32823	-3.67252	2.43313	0.489607	2.85864	8.77903	-9.43868	-0.536311	0.932587	3.26264	-1.17796	-1.30037	3.83959	3.08036	0.847371	1.03596	1.42097	-1.90288	4.28452	2.28644	-4.91132	4.41641	-2.38099	-0.332216	3.52018	10.6266	79	1.99558	-5.37343	-6.33859	3.1019	0.235982	0.915934	-0.558657	-3.79173	-2.82982	-4.72707	-6.41864	-4.56766	1.81944	7.59496	2.22433
80	1.66037	2.14135	3.8282	4.18348	2.17311	1.50864	1.55469	7.74592	-4.35246	2.49459	0.37404	3.40255	9.07438	-9.05526	-0.57871	1.01814	2.89078	-1.47176	-1.15758	4.04633	2.40541	1.61937	-0.021215	1.68194	-0.590193	4.3303	2.09066	-4.8199	4.42369	-2.56326	-0.552232	3.32306	11.2181	80	1.85918	-6.71144	-6.78315	4.73804	3.01773	0.692867	-0.84563	-4.05933	-3.27159	-3.89982	-6.62365	-5.40424	1.31391	7.00817	2.0737
81	1.78207	2.10462	3.59328	4.55648	2.35595	1.53238	1.48364	7.87102	-3.94516	2.58433	0.198657	3.92431	9.13796	-8.6149	-0.572239	1.18323	2.60729	-2.20638	-1.4611	4.46756	1.66008	2.04755	-0.49622	1.96221	0.650733	4.85945	1.63425	-4.59478	4.46032	-2.72248	-0.499862	3.03925	12.1342	81	2.01466	-8.09325	-7.49857	6.1653	5.86749	0.466721	-1.49734	-4.00126	-3.3739	-3.49725	-6.74774	-6.12807	1.48774	5.47144	2.01197
82	2.09561	2.06431	3.37863	4.90092	2.8141	1.39262	1.36313	7.7593	-3.35344	2.68793	-0.0132846	4.42667	9.204	-8.12844	-0.547923	1.37197	2.45537	-2.95177	-1.66971	4.62749	0.802537	1.79814	-0.587836	2.28931	1.51563	5.25476	1.33652	-4.28629	4.48893	-2.69176	-0.104306	2.81443	12.5974	82	3.13564	-9.77853	-7.90847	7.42402	7.72077	0.372425	-2.27968	-4.70575	-3.07749	-3.31012	-6.59252	-6.29718	1.76151	4.02221	2.1323
83	2.60147	1.99571	3.45853	4.78143	2.99175	1.2132	1.36218	7.44886	-2.62465	2.82824	-0.153343	4.8073	9.04903	-7.80114	-0.518806	1.46195	2.42542	-2.51505	-1.61966	3.96657	0.0581297	1.15	-0.713165	2.6876	1.75374	5.57025	1.11396	-4.05356	4.42208	-2.58731	0.286833	2.41354	12.4726	83	4.05332	-10.6904	-7.52048	8.39348	8.3041	0.357313	-2.87319	-4.26344	-3.09519	-4.07728	-6.30026	-6.24001	1.70128	2.91968	2.35973
84	3.05197	1.65082	3.7066	4.70776	3.59371	1.10731	1.49347	6.98495	-2.22836	2.8199	-0.262096	4.93421	8.63651	-7.47054	-0.493097	1.53933	2.40039	-2.01796	-1.48296	3.51409	-0.34575	0.613962	-0.644947	2.95344	1.63557	5.93403	0.952242	-3.98388	4.31874	-2.42586	0.363025	1.86491	11.5556	84	4.88798	-10.793	-6.89624	8.52335	8.61601	0.356984	-3.08677	-3.18455	-2.39308	-4.89034	-5.88189	-6.25338	0.929725	1.44699	2.39892
85	3.25517	1.25751	4.07305	4.70379	4.28835	0.870171	1.63575	6.43455	-2.56633	2.68447	-0.32024	5.04921	8.28745	-7.0774	-0.399894	1.62677	2.42908	-1.7405	-2.46436	3.51359	-0.721132	0.223342	0.0759639	2.92806	1.4888	6.3485	0.84119	-3.90643	4.16835	-2.15505	0.380165	1.44905	10.1217	85	5.28823	-10.1603	-5.74649	8.49737	9.24074	0.54974	-3.4263	-1.66114	-1.70609	-5.26388	-5.26464	-6.29831	-0.0589169	-0.25884	2.26204
86	3.2868	1.02657	4.43415	4.77547	4.49134	0.520514	1.72585	6.12486	-3.52619	2.47587	-0.349104	5.14188	8.03388	-6.99458	-0.314294	1.60767	2.43321	-0.914725	-2.87468	3.72213	-1.15653	-0.055035	0.843352	2.85716	1.60717	6.53249	0.599534	-3.67998	3.98499	-1.79061	0.108599	1.46267	9.40953	86	5.00567	-9.24667	-4.37231	8.44486	9.32923	0.741018	-4.00279	-0.39944	-1.9639	-5.08547	-4.63435	-6.244	-1.12508	-1.28952	2.28284
87	3.21596	0.952569	4.99863	4.807	4.33378	0.304126	1.77028	5.80941	-3.51778	2.4575	-0.295243	5.21058	7.70813	-6.99285	-0.263899	1.49351	2.46633	-0.763004	-3.03962	3.87948	-1.61872	-0.0348343	1.9563	2.86403	1.32442	6.38604	0.447931	-3.21123	3.58686	-1.48099	0.0711832	1.34773	8.23932	87	4.42738	-9.0433	-3.13627	8.31531	8.20315	0.763151	-3.89791	1.23568	-2.25336	-4.23089	-4.35846	-5.99694	-2.00904	-1.94012	2.25918
88	3.03039	1.09894	5.41477	4.19488	4.50732	0.0882405	1.45078	5.40365	-3.61347	2.5931	-0.218845	5.033	7.4095	-6.78183	-0.220691	1.39113	2.73362	-0.513239	-3.8822	2.89274	-1.77346	0.299272	2.77145	2.80731	0.65714	6.03219	0.119681	-2.46969	3.33334	-1.4159	0.174055	1.54024	6.5328	88	3.84592	-8.78068	-2.20241	8.52224	7.24083	0.740037	-3.31309	3.11542	-2.15707	-3.83041	-3.93527	-5.59153	-2.57352	-2.74923	2.20578
89	2.81035	1.19573	5.44898	3.43677	4.59456	0.048919	1.06073	4.88396	-3.47395	2.78059	-0.178746	4.66116	7.27154	-6.48955	-0.199727	1.16742	3.166	-0.795242	-3.5027	1.16905	-1.64245	0.857602	3.26541	2.61226	0.227427	5.30803	-0.161024	-1.66519	3.03219	-1.41038	0.227877	2.0777	5.08805	89	4.21953	-8.19938	-1.57242	8.59322	7.78281	0.611573	-2.93635	4.56324	-1.66858	-3.33861	-3.23863	-5.29978	-2.96731	-3.39262	2.25295
90	2.61547	1.30214	5.33438	3.23106	4.39764	0.199796	0.700509	4.29735	-3.81965	3.22561	-0.122323	4.29861	7.34928	-6.27207	-0.202745	0.849412	3.59776	-1.08131	-4.05523	-0.358257	-1.44491	1.56971	3.50894	2.3834	-0.138574	4.55954	-0.254644	-1.11556	2.87439	-1.55627	0.11718	2.50881	4.61112	90	4.70307	-7.92462	-0.871428	8.85273	8.52566	0.350003	-2.60869	6.20229	-0.750523	-3.25578	-2.00643	-5.11027	-2.59676	-3.95024	2.33034
91	2.39104	1.41615	5.04191	3.23008	4.18477	0.50252	0.372711	3.57713	-4.01412	3.6616	-0.0467821	3.87277	7.32198	-5.98832	-0.181525	0.648675	3.98979	-1.41969	-4.54227	-1.19835	-1.17581	2.39226	3.52141	2.29032	-1.19343	4.16	0.129856	-0.846745	2.59944	-1.71027	0.198412	2.71348	3.83988	91	5.60288	-8.06567	-0.197955	9.15496	8.59301	0.230661	-2.46564	7.47859	0.727333	-2.70415	-0.730204	-4.95532	-2.26703	-4.57016	2.30592
92	2.11175	1.62038	5.08056	3.47447	3.96573	0.788698	0.0956535	2.85969	-3.71401	3.93149	0.0712068	3.62122	7.28505	-5.66041	-0.23449	0.553676	4.34559	-1.85902	-4.46493	-2.16227	-0.943508	2.79462	3.56094	2.20894	-2.24899	3.92212	0.397163	-0.594906	2.42007	-1.77618	0.0809102	2.73449	2.66936	92	5.98155	-8.28718	0.928158	9.55721	7.52702	0.132629	-2.21888	8.12996	1.38991	-1.65413	0.111253	-4.78843	-2.50424	-5.30616	2.26942
93	1.82846	1.98157	4.88746	3.71931	3.79316	1.09392	-0.06189	2.23603	-3.06161	4.01317	0.157407	3.64707	7.32859	-5.28477	-0.399875	0.488914	4.62025	-1.87636	-4.60258	-2.40057	-0.912213	2.79084	3.44289	2.15104	-2.33323	3.62262	1.39991	-0.331326	2.18531	-1.77471	0.0110858	2.66999	1.66396	93	5.73982	-7.64167	2.40285	9.39982	6.77258	-0.0565728	-1.38606	8.35883	0.798456	-0.739998	0.276117	-4.65647	-2.97457	-6.1542	2.28723
94	1.65743	2.43157	4.49784	3.61324	3.68092	1.36607	-0.205645	1.63478	-2.0559	3.97101	0.26068	3.80552	7.35659	-5.02101	-0.573613	0.522331	4.86202	-1.64786	-4.18608	-2.53705	-0.765932	2.95361	3.19385	2.04163	-1.68599	3.10414	2.15074	-0.168361	2.13872	-1.66021	0.137632	2.62432	1.20329	94	4.76301	-7.05848	4.09744	8.95685	6.46896	-0.171495	-0.36251	8.34495	0.0445662	-0.372119	0.34472	-4.62489	-2.57433	-6.9476	2.29233
95	1.4949	2.72126	3.92136	3.30163	3.48929	1.63728	-0.579111	1.06701	-2.12642	3.93536	0.380582	3.63827	7.47832	-4.58797	-0.610059	0.58539	5.05474	-1.54813	-3.91268	-2.3212	-0.420973	2.90148	2.85266	1.84775	-1.09278	2.34273	2.86189	-0.0510316	1.93173	-1.5039	0.546211	2.57843	1.3996	95	4.08575	-7.2348	6.19227	8.81734	5.30829	-0.330437	0.278882	8.75902	-0.402483	0.157681	0.497779	-4.64394	-1.52511	-7.54735	2.4236
96	1.37766	2.76888	3.49092	3.35131	3.47805	1.75258	-0.891695	0.589766	-1.34036	3.79519	0.519517	3.3325	7.58626	-4.12686	-0.579507	0.600284	5.16219	-1.39062	-3.26174	-1.8189	0.0607893	2.37574	2.42375	1.49137	-0.746613	1.68989	3.14704	-0.0193969	1.66415	-1.41173	0.674885	2.42079	1.75959	96	3.27022	-7.86824	7.98995	8.27737	4.46797	-0.501114	0.267687	9.52058	0.000295841	0.512777	0.464647	-4.91499	-0.526565	-7.65875	2.56997
97	1.23463	2.6837	2.9275	3.35394	3.40241	1.86159	-1.10793	0.20108	-1.16114	3.72492	0.613726	3.02752	7.74661	-3.44557	-0.483824	0.46189	5.23582	-0.837176	-3.18518	-1.66169	0.484408	2.27171	2.21197	1.05578	-0.706049	1.26249	3.20099	0.163747	1.50642	-1.50664	0.755921	2.39845	1.92627	97	2.36996	-7.73618	9.56016	7.28338	4.1781	-0.729678	0.110705	10.3016	0.162144	1.11908	0.395353	-5.18115	0.209146	-7.31979	2.65136
98	1.03686	2.70391	2.32291	3.18143	3.52178	1.87476	-1.17949	-0.0850261	-0.598241	3.7428	0.622424	2.61352	7.90913	-2.83649	-0.366319	0.418488	5.27056	0.00117358	-2.08987	-0.949532	0.816908	2.0707	1.9762	0.624654	-0.530606	1.24868	3.07372	0.409205	1.36157	-1.64771	0.446015	2.47321	2.53454	98	1.33369	-7.03529	10.8299	6.2297	4.26113	-0.84398	-0.53751	10.75	0.570644	1.96307	0.0335191	-5.29242	0.533563	-6.88581	2.97499
99	0.890692	2.74174	1.23074	2.91571	3.52046	1.84204	-1.29401	-0.311495	1.5275	3.66018	0.599856	2.16454	7.92561	-2.52477	-0.339865	0.573578	5.21317	1.01214	-1.73167	0.0183494	0.99463	1.93395	1.62679	0.329416	-0.72033	1.13509	3.06442	0.624034	1.40651	-1.79088	0.227731	2.64829	3.646	99	0.660913	-5.83586	11.9852	6.10252	4.09938	-0.882198	-1.85153	11.5083	0.160176	2.8787	-0.290038	-5.27168	0.723289	-6.20694	3.17865
100	0.886146	2.64457	0.121823	2.92253	3.11368	1.85572	-1.47313	-0.47589	4.65443	3.56934	0.651487	1.94441	7.8612	-2.31037	-0.447743	0.674685	5.11901	2.15265	-1.8824	1.35635	1.15891	1.71259	0.850845	-0.0209898	-1.43344	0.812166	2.97423	0.658424	1.62806	-1.98319	0.323459	2.63504	5.60178	100	0.0497344	-4.11133	13.1129	5.74998	3.90192	-0.848949	-2.65195	12.1505	0.012904	3.71606	-0.450866	-5.26671	1.04192	-5.33614	3.27044
[truncated: 52 more columns]

## Sheet: Middle Trapezius Differences
COMB	C = CONTROL		P = PAIN																															Overhead Reach
% Motion	C02R	C03R	C04R	C06R	C07R	C10R	C12R	C18R	C21R	C02L	C03L	C04L	C06L	C07L	C10L	C12L	C18L	C21L	P01R	P05R	P06R	P07R	P08R	P09R	P01L	P02L	P03L	P04L	P05L	P06L	P07L	P09L	% Motion	C02R	C03R	C04R	C06R	C07R	C10R	C12R	C18R	C21R	C02L	C03L	C04L	C06L	C07L	C10L	C12L
1	-3.20468	-0.312822	-0.0501056	0.220256	-0.180186	0.314995	-3.89156	24.4113	-1.22323	0.00447251	0.18226	-0.556075	0.212764	0.0150512	0.0632503	-1.46022	-1.87301	-0.0332266	0.865688	-1.15325	0.524875	-0.549773	-0.460048	1.86668	-1.6295	-1.5321	-0.692222	0.671239	-0.26391	0.63179	-0.0802895	2.398	1	-7.20513	1.51379	-0.931455	2.20632	-3.48735	-0.129748	-3.90387	-1.03853	2.06597	-0.203188	0.105113	-1.42551	0.163749	-1.59947	-0.346158	-2.78728
2	-3.38212	-0.272097	-0.00366013	0.303891	-0.240814	0.333617	-4.02036	23.3258	-0.935496	-0.00387411	0.119517	-0.579246	0.251804	0.000143654	0.0735971	-1.57798	-1.48202	0.617229	0.313263	-1.21758	0.442666	-0.554203	-0.481381	1.5021	-2.41087	-1.26038	-0.739677	1.08064	-0.249635	1.19716	-0.447022	2.20448	2	-8.00055	1.34408	-1.3456	1.52571	-3.72936	-0.113551	-3.73214	-1.13376	2.27613	-0.16173	0.0165874	-1.41465	0.13575	-1.52069	-0.358315	-2.40674
3	-3.69608	-0.274939	0.00964101	0.348715	-0.279037	0.36849	-3.9984	21.8014	-0.0397658	-0.036211	0.0721837	-0.574389	0.290122	0.039361	0.0816882	-1.70617	-0.969751	0.62273	-0.321608	-1.26988	0.526921	-0.476714	-0.51356	1.16796	-2.92244	-1.00227	-0.736701	1.49007	-0.233902	1.42303	-0.98191	2.11527	3	-8.92155	1.24842	-1.73717	0.581627	-3.91038	-0.0899552	-3.64969	-1.46412	2.63466	-0.0494587	-0.356351	-1.38312	0.0742585	-1.35823	-0.369111	-2.08603
4	-4.12113	-0.28309	0.0404681	0.296755	-0.311195	0.392194	-3.70007	19.6487	0.85737	-0.137893	0.0374587	-0.564473	0.333452	0.0683815	0.0920969	-1.82176	-0.436785	0.373921	-0.76801	-1.25595	0.631044	-0.184024	-0.560844	0.72643	-3.41507	-0.708134	-0.704796	1.73259	-0.230054	1.26116	-1.3593	2.089	4	-9.43465	1.12623	-2.02508	-0.203377	-4.09021	-0.0633785	-3.34653	-1.62286	2.84572	0.0839421	-0.860845	-1.357	-0.0329397	-0.97628	-0.395846	-1.68775
5	-4.64536	-0.332192	0.0899134	0.480494	-0.471971	0.403317	-3.5468	17.081	1.70402	-0.288255	0.00395745	-0.542014	0.373544	0.112027	0.104844	-1.98382	0.157372	0.225181	-2.31952	-1.22971	0.740872	0.156271	-0.609435	0.393444	-3.59044	-0.406942	-0.660936	1.85952	-0.236223	0.87168	-1.4738	2.06242	5	-9.65752	0.928765	-2.27478	-0.742758	-4.40787	-0.0498929	-2.65436	-0.941845	2.54946	0.307952	-1.14347	-1.31887	-0.12178	-0.522459	-0.410863	-1.3299
6	-5.13556	-0.431516	0.164156	0.718629	-0.669202	0.413813	-3.39462	14.1778	1.98793	-0.407915	-0.00292132	-0.493767	0.380195	0.113559	0.123368	-2.13986	0.867262	0.100814	-3.37086	-1.13209	0.943762	0.40604	-0.655449	-0.0176063	-3.61482	-0.337498	-0.636812	1.86431	-0.254585	0.517048	-1.34787	2.03882	6	-9.89084	0.726089	-2.43351	-1.09665	-4.67823	-0.0507737	-2.10064	0.0539745	1.78037	0.451536	-1.05373	-1.27399	-0.175408	-0.182045	-0.417707	-1.04718
7	-5.51766	-0.548156	0.259706	0.993128	-0.846702	0.412343	-3.16204	11.1211	1.77834	-0.446334	0.0309598	-0.456062	0.348956	0.049336	0.142173	-2.19963	1.54177	0.000584299	-5.06417	-0.919679	0.726575	0.554724	-0.711249	-0.324673	-3.63882	-0.453987	-0.648976	1.76552	-0.270027	0.220576	-1.03329	1.95309	7	-9.84245	0.37308	-2.52081	-1.11374	-4.72879	-0.0409191	-1.70996	0.763055	1.16142	0.323091	-0.885463	-1.15939	-0.210684	0.0901175	-0.427217	-0.789553
8	-5.87057	-0.679079	0.429042	1.18721	-0.970723	0.426077	-2.84773	8.00852	1.39855	-0.475318	0.0680663	-0.414375	0.316198	-0.0310137	0.15287	-2.15263	2.25965	-0.18892	-6.77278	-0.629063	0.330903	0.788353	-0.763389	-0.339178	-3.54425	-0.705062	-0.66352	1.58303	-0.289318	-0.155747	-0.57207	1.93818	8	-10.1531	0.0569943	-2.3636	-1.21906	-4.43719	-0.0286407	-1.34133	1.14335	0.919309	0.102078	-0.915898	-0.982049	-0.178097	0.33966	-0.437075	-0.693867
9	-6.14204	-0.747154	0.609435	1.321	-1.02143	0.454556	-2.30356	4.7124	1.31614	-0.462994	0.0582909	-0.356271	0.297858	-0.0502548	0.164079	-2.16211	2.83743	-0.442228	-8.02525	-0.304468	0.24823	1.12319	-0.810628	-0.310745	-3.59654	-0.827137	-0.702638	1.38753	-0.299296	-0.295916	-0.0582949	1.62985	9	-10.3294	-0.195825	-1.97806	-1.25709	-3.85765	-0.0240778	-1.12776	1.38329	0.685197	-0.246731	-1.22373	-0.738552	-0.116124	0.578265	-0.436629	-0.536225
10	-6.34208	-0.785753	0.785026	1.36686	-1.0493	0.4824	-1.51901	1.58437	1.64696	-0.416639	0.0599884	-0.290131	0.29752	-0.0411895	0.189488	-2.22246	3.10955	-0.466198	-9.00672	0.0550513	0.4228	1.43162	-0.882496	-0.210218	-3.71959	-0.816467	-0.772643	1.16902	-0.309893	-0.232595	0.325787	0.730639	10	-10.2322	-0.380373	-1.50712	-1.26933	-3.18322	-0.0258849	-1.07339	1.74431	0.32837	-0.879618	-1.48596	-0.481796	-0.0622401	0.616439	-0.420961	-0.230765
11	-6.63404	-0.874393	1.01654	1.42631	-1.0376	0.500765	-0.546461	-1.23627	1.75257	-0.370316	0.100792	-0.245125	0.294986	-0.035146	0.214552	-2.21982	3.12072	-0.394258	-8.85899	0.37658	0.993072	1.53273	-0.918627	-0.0731516	-4.1024	-0.81594	-1.02016	0.968568	-0.295298	0.0904827	0.705939	-0.359404	11	-9.91115	-0.467032	-0.905941	-1.08187	-2.13452	-0.0302107	-0.808647	2.44869	0.0728391	-1.53983	-1.54085	-0.254039	-0.0233166	0.485273	-0.382759	0.177776
12	-7.04182	-0.945361	1.21481	1.46562	-0.968162	0.532248	0.528675	-3.70364	2.01355	-0.232632	0.157621	-0.190423	0.294713	-0.0203974	0.247633	-2.05258	3.03806	-0.226837	-7.68694	0.661432	1.18133	1.40964	-0.956878	-0.154602	-4.56155	-0.669494	-1.32236	0.781606	-0.311444	0.530603	1.1619	-1.18569	12	-9.26145	-0.466079	-0.324599	-0.643784	-0.735118	-0.0524846	-0.881516	3.22359	0.0769956	-2.26635	-1.35963	-0.11279	-0.0133474	0.329546	-0.334812	0.185316
13	-7.53246	-0.90765	1.38795	1.42295	-0.896303	0.566678	1.28274	-5.77469	2.22716	-0.0295794	0.227003	-0.119094	0.295781	-0.0270569	0.288315	-1.93014	2.96349	-0.0234765	-5.35402	0.873862	1.20502	1.2099	-1.07113	-0.409657	-5.20496	-0.578352	-1.55325	0.632142	-0.34296	0.702685	1.57054	-1.66803	13	-8.81841	-0.2302	0.255184	-0.0826252	0.633436	-0.0762966	-0.969857	3.68284	0.192736	-2.87962	-1.14526	-0.0251529	-0.0200676	0.109772	-0.307005	0.115386
14	-7.99449	-0.905783	1.4848	1.26127	-0.875145	0.567124	1.4773	-7.48618	2.34525	0.315987	0.29676	-0.026961	0.290817	-0.0192184	0.30535	-1.96894	2.85495	0.216168	-3.72194	1.0831	0.880575	0.917554	-1.25058	-0.532798	-5.5362	-0.596017	-1.73838	0.549412	-0.338671	0.764473	1.83033	-1.95447	14	-8.26508	-0.0579229	0.738179	0.282039	1.72095	-0.0952576	-0.783572	4.04641	0.252633	-3.36507	-1.07542	0.0599271	0.0025836	-0.0972735	-0.285004	0.0848808
15	-8.3531	-0.950466	1.54323	1.03334	-0.726947	0.576165	1.42697	-8.81609	2.60624	0.678814	0.364459	0.0567193	0.272504	-0.0609735	0.291458	-2.10971	2.77528	0.388754	-2.56553	1.32675	0.909458	0.554979	-1.40462	-0.550781	-5.70118	-0.341861	-1.84345	0.539874	-0.369475	0.85192	2.24526	-1.88815	15	-7.5277	0.233781	0.750851	0.423497	2.51734	-0.116635	-0.462516	4.208	0.0902766	-3.88286	-1.17138	0.138939	0.0251606	-0.245077	-0.279474	0.183222
16	-8.56106	-0.96195	1.5999	0.843257	-0.530086	0.601815	1.2352	-9.89986	2.65157	1.02065	0.468302	0.147885	0.252472	-0.108141	0.265285	-2.32562	2.69859	0.428448	-2.58471	1.5238	0.928577	0.276226	-1.45877	-0.688507	-5.98126	0.031783	-1.96633	0.672649	-0.456927	0.883944	2.60784	-1.56402	16	-6.59231	0.648788	0.345849	0.497042	3.22806	-0.142669	-0.324635	3.89021	0.0734358	-4.27405	-1.17801	0.206674	0.00203856	-0.289309	-0.274212	0.458961
17	-8.56036	-0.989088	1.59997	0.716772	-0.327496	0.619754	0.975846	-10.7707	2.51826	1.26144	0.548158	0.190715	0.237487	-0.127244	0.221541	-2.55979	2.63366	0.408364	-2.99972	1.69729	0.602065	0.14264	-1.40906	-0.721885	-6.01974	0.195579	-2.06039	0.9454	-0.572274	1.03968	3.05154	-1.12478	17	-5.62485	0.967737	-0.180211	0.495446	3.50177	-0.161335	-0.493807	3.7821	0.185864	-4.5284	-1.11886	0.223729	-0.0212682	-0.251858	-0.267038	0.517384
18	-8.10604	-0.977497	1.5948	0.552303	-0.233626	0.651614	0.783306	-11.4223	2.25178	1.3402	0.582851	0.132754	0.217094	-0.0959602	0.216967	-2.65924	2.46619	0.425264	-3.075	1.99059	0.482328	0.172766	-1.28587	-0.777292	-5.75362	0.233565	-2.1012	1.26378	-0.636613	0.938535	3.53612	-0.622936	18	-4.79126	1.26126	-2.29619	0.510034	3.72061	-0.174771	-0.456353	3.66343	0.346679	-4.80009	-0.96651	0.208679	-0.0288477	-0.25878	-0.269715	0.0215646
19	-7.65276	-0.851673	1.57013	0.420246	-0.229515	0.691964	0.555886	-11.663	2.12185	1.47193	0.592489	0.0567611	0.182105	-0.0346748	0.234057	-2.83666	2.18987	0.556942	-2.94091	2.44655	0.546024	-0.0171174	-0.993903	-0.681192	-5.62499	0.0456377	-2.09572	1.44952	-0.630867	0.857802	3.57144	-0.146857	19	-4.34993	1.49692	-3.75346	0.454535	3.57421	-0.183599	-0.224211	3.63289	0.574724	-4.74474	-0.651122	0.189517	-0.0231281	-0.29773	-0.272159	-0.521475
20	-7.29525	-0.658534	1.48398	0.142247	-0.23946	0.718217	0.31614	-12.2046	1.99902	1.61537	0.573358	0.000116985	0.145375	0.00108297	0.281627	-2.90346	1.90397	0.703867	-3.53028	2.84585	0.66179	-0.46473	-0.65312	-0.45406	-5.57212	-0.122129	-2.03745	1.51063	-0.570392	0.736342	3.59021	0.07142	20	-3.90314	1.59264	-3.87702	0.24124	3.28238	-0.185951	0.151554	3.63377	0.919466	-4.65036	-0.347743	0.167134	-0.00487512	-0.343491	-0.273917	-0.785487
21	-6.98329	-0.461821	1.37175	-0.30862	-0.33201	0.749201	0.0887034	-13.5477	1.96542	1.72527	0.552004	-0.0632319	0.0907326	-0.0158224	0.307784	-2.83653	1.68068	0.721459	-4.60232	3.23616	0.540712	-0.62047	-0.366459	-0.401201	-5.57654	-0.309517	-1.95522	1.45756	-0.501511	0.707004	3.50527	0.0147688	21	-3.7575	1.7333	-3.28301	0.0656299	3.14061	-0.183832	0.173077	3.762	1.09845	-4.49435	-0.213346	0.158407	-0.0264155	-0.319061	-0.275819	-0.888076
22	-6.78759	-0.316248	1.30239	-0.731833	-0.444646	0.775488	0.130808	-14.5656	1.71456	1.82112	0.547951	-0.14293	0.0249628	-0.13503	0.311953	-2.71677	1.48332	0.719356	-5.16873	3.54369	0.339221	-0.386807	-0.126084	-0.398367	-5.03693	-0.278915	-1.76289	1.39346	-0.474561	0.612829	3.39222	0.419405	22	-3.63	1.64967	-2.49203	-0.100549	2.88914	-0.180204	0.41921	3.90644	1.09498	-4.25991	-0.133979	0.135156	-0.129742	-0.210537	-0.264526	-0.851892
23	-6.63197	-0.240419	1.21976	-0.94442	-0.509165	0.797562	0.345622	-14.9443	1.50282	1.82375	0.513523	-0.239133	-0.0338786	-0.260803	0.310614	-2.40999	1.36402	0.687013	-4.42293	3.58018	0.352641	-0.00517087	0.0281677	-0.60522	-4.09599	-0.146435	-1.45189	1.30298	-0.4596	0.664074	3.32569	1.01217	23	-3.4369	1.5657	-1.61654	-0.153523	2.95109	-0.185092	0.659354	3.45867	1.13742	-3.82312	-0.122298	0.0914141	-0.223995	-0.0854838	-0.244609	-0.520405
24	-6.66675	-0.319274	1.1357	-1.0571	-0.486062	0.79823	0.453912	-14.7531	1.27897	1.64883	0.484689	-0.330556	-0.0854032	-0.337545	0.318263	-2.03355	1.30055	0.643012	-3.68481	3.39355	0.685267	0.445388	0.207508	-0.777495	-3.25352	-0.227411	-1.14693	1.24016	-0.40991	0.668674	3.41057	0.665087	24	-2.94395	1.65308	-0.83879	-0.140008	2.97443	-0.192336	0.870104	2.3432	1.01014	-3.14546	-0.379868	0.0567556	-0.34222	0.0492903	-0.194442	-0.230832
25	-6.81476	-0.373656	1.05238	-1.08187	-0.381553	0.794287	0.539303	-13.9317	1.0887	1.44065	0.469933	-0.411844	-0.120812	-0.382254	0.302968	-1.71736	1.23717	0.649351	-3.14829	3.1152	0.79137	1.04156	0.366603	-1.25122	-2.06398	-0.334201	-0.903384	1.2041	-0.353924	0.539659	3.84884	0.321939	25	-2.62349	1.88743	-0.384924	-0.152703	3.10672	-0.200126	0.963802	0.838903	0.927697	-2.44647	-0.795453	0.0243877	-0.480074	0.248845	-0.112868	0.121313
26	-7.06437	-0.343047	1.05093	-1.05131	-0.27293	0.794695	0.790527	-12.63	0.79431	1.28211	0.487805	-0.453355	-0.144598	-0.443726	0.286562	-1.46713	1.17517	0.705502	-3.23595	2.96377	0.558481	1.51402	0.486762	-1.31125	-0.903841	-0.555104	-0.859728	1.12945	-0.342401	0.356787	4.45314	-0.329642	26	-2.71822	2.21634	-0.433531	-0.373818	3.07056	-0.202567	1.04497	-0.411827	0.623085	-1.72413	-0.952649	-0.0155142	-0.623671	0.434877	-0.0437698	0.810872
27	-7.19808	-0.283933	1.10653	-0.987122	-0.276519	0.784163	1.04197	-11.0592	0.582201	1.29371	0.519469	-0.457784	-0.172926	-0.507623	0.256424	-1.21004	1.1124	0.700552	-3.52977	2.94464	0.0777234	1.68821	0.6402	-1.33739	-0.00565125	-0.706261	-1.01219	1.13645	-0.319581	0.291552	4.72814	-0.729868	27	-3.02175	2.45244	-0.719402	-0.60315	3.17137	-0.192607	1.31317	-0.893527	0.281101	-1.05503	-1.17759	-0.0554306	-0.6491	0.519942	0.0128675	1.40057
28	-7.3085	-0.116296	1.18466	-0.660647	-0.317585	0.769821	1.22772	-9.3536	0.456653	1.46287	0.515822	-0.518881	-0.177844	-0.555575	0.156496	-0.811215	1.09262	0.722382	-4.63403	2.97509	-0.389577	1.76828	0.627434	-1.35823	0.432856	-0.8392	-1.16116	1.24487	-0.224298	0.152412	4.9465	-1.22716	28	-3.26363	2.71539	-1.22631	-0.614894	3.37035	-0.161682	1.49901	-0.636908	-0.242304	-0.0779643	-1.36624	-0.0912943	-0.583164	0.562998	0.0604241	1.86137
29	-7.50255	0.074345	1.24712	-0.43168	-0.365234	0.769713	1.49569	-7.88923	0.577953	1.77405	0.52223	-0.64759	-0.157208	-0.564425	-0.0707693	-0.40657	1.12848	0.706872	-3.67409	3.15005	-0.942556	1.63665	0.490214	-1.21501	0.395808	-0.986531	-1.28256	1.4058	-0.0813223	-0.0436057	5.03991	-1.47789	29	-3.41817	2.92414	-1.8604	-0.415029	3.19118	-0.134243	1.5555	0.0263819	-0.629007	0.39649	-1.47895	-0.159131	-0.497497	0.69438	0.111994	2.23228
30	-7.69938	0.153578	1.35835	-0.231067	-0.369483	0.777067	1.5272	-6.95826	0.480783	2.10496	0.572687	-0.763806	-0.159243	-0.597033	-0.310976	-0.170585	1.17798	0.676141	-2.24079	3.25428	-0.910025	1.82029	0.341106	-1.45757	0.481509	-1.1273	-1.54647	1.63418	0.0679726	-0.383102	5.09081	-1.24671	30	-3.55756	2.97964	-3.09325	-0.286812	3.10599	-0.108956	1.5755	1.01069	-0.743212	0.695312	-1.54051	-0.216813	-0.452098	0.821817	0.152813	2.43121
31	-7.83855	0.161594	1.51054	-0.0662098	-0.349423	0.788565	1.48126	-6.2915	0.130454	2.41094	0.704141	-0.819613	-0.141692	-0.609444	-0.48475	-0.13825	1.25716	0.706393	-1.54984	3.3171	-0.532453	2.03983	0.212721	-1.87429	0.452809	-1.2012	-1.80365	1.99823	0.162796	-0.496953	5.06191	-1.22799	31	-3.66819	2.9446	-4.89355	-0.416736	3.23134	-0.0876982	1.4964	1.42376	-0.808574	0.952142	-1.62775	-0.250658	-0.314125	0.94377	0.180193	2.66739
32	-7.77145	0.199215	1.68338	0.0962597	-0.395721	0.786692	1.57474	-5.67506	0.0685481	2.59649	0.790212	-0.853861	-0.120485	-0.598152	-0.632591	-0.207358	1.40388	0.72453	-0.329787	3.43888	-0.792961	2.43732	0.25475	-1.82375	0.140397	-1.42895	-1.93551	2.26809	0.270679	-0.351235	4.75937	-1.36713	32	-3.50061	3.02526	-6.19619	-0.447247	3.25612	-0.0816657	1.36485	2.03374	-0.700079	0.901975	-1.59567	-0.25425	-0.11302	1.05021	0.209213	3.01753
33	-7.39253	0.231339	1.80282	0.315055	-0.410729	0.76685	1.79767	-4.9729	0.0591465	2.61451	0.849884	-0.83654	-0.0907692	-0.60806	-0.762291	-0.411857	1.48534	0.743078	0.495771	3.61864	-0.725883	3.09704	0.448777	-1.92493	-0.0911906	-1.49711	-2.03503	2.333	0.398697	-0.244796	4.59542	-1.31649	33	-3.20245	3.08346	-6.9239	-0.571251	3.24776	-0.0879724	1.32764	2.56381	-0.625994	1.02974	-1.56087	-0.223361	0.0635082	1.07692	0.223929	3.11448
34	-7.05765	0.19685	1.78099	0.444999	-0.414068	0.760156	1.99717	-4.47462	-0.0812638	2.56286	0.903141	-0.745646	-0.00836162	-0.565001	-0.883304	-0.743261	1.40435	0.676783	0.797346	3.76192	-0.712562	4.0903	0.724048	-1.96809	-0.65336	-1.56392	-2.16978	2.38589	0.569575	-0.237029	4.53746	-1.5078	34	-2.676	3.18406	-7.52635	-0.779335	3.23121	-0.0977097	1.22573	2.40784	-0.504098	1.03208	-1.47235	-0.150032	0.120958	1.051	0.234953	3.17458
35	-7.04151	0.188332	1.7342	0.496161	-0.480786	0.75692	1.9547	-4.19503	-0.0717406	2.43492	0.930369	-0.657264	0.0778104	-0.505936	-1.01294	-1.05824	1.22752	0.55976	0.33095	3.85146	-0.686549	4.71316	0.984649	-1.69031	-1.627	-1.69453	-2.11501	2.25776	0.729154	-0.150917	4.59394	-2.13883	35	-1.74001	3.16723	-8.01141	-0.964711	3.42428	-0.10463	1.23875	2.23463	-0.349905	1.12769	-1.25267	-0.107671	0.0864223	0.971299	0.226378	3.22871
36	-7.00687	0.291036	1.67555	0.545684	-0.585295	0.75501	2.2401	-3.61307	-0.187389	2.27362	0.950751	-0.596952	0.18207	-0.393543	-1.10648	-1.41257	1.13483	0.515542	-0.0759496	3.90312	-0.634976	4.67136	1.22951	-1.21695	-2.31108	-2.07846	-2.05016	1.88922	0.839861	-0.349512	4.60976	-2.90627	36	-0.840382	3.10067	-7.88724	-1.04581	3.66148	-0.106749	1.37061	2.4381	-0.0790964	1.18969	-0.897202	-0.0640627	0.0396827	0.851699	0.194711	3.1774
37	-6.95648	0.467879	1.486	0.691254	-0.573328	0.763528	2.53727	-3.11202	-0.158024	2.17196	0.956969	-0.561485	0.303908	-0.247587	-1.21077	-1.64929	1.08464	0.387712	0.0605383	3.97374	-0.130607	4.48921	1.51089	-0.733112	-2.70126	-1.98995	-1.96173	1.57444	0.903135	-0.329082	4.49172	-3.51581	37	0.446555	2.96559	-7.04909	-0.832744	3.85317	-0.109928	1.46995	2.87942	0.054933	1.26962	-0.362035	-0.0402286	0.0301941	0.704842	0.167323	3.01535
38	-6.76448	0.637862	1.34692	0.917324	-0.453864	0.760294	2.93946	-2.6435	-0.182784	1.8789	0.908907	-0.537066	0.422353	-0.139303	-1.35664	-1.88319	0.946265	0.222322	-0.382638	4.09953	0.237708	4.20766	1.67035	-0.0595877	-3.32641	-1.82284	-1.87846	1.52016	0.924058	-0.105109	4.19725	-3.49979	38	1.40266	2.90608	-5.86935	-0.496618	3.95561	-0.104109	1.52962	3.00152	0.0863911	1.32395	0.228689	-0.0359631	0.0307067	0.579069	0.152686	2.56618
39	-6.52757	0.766732	1.43352	1.04507	-0.290066	0.743839	3.30819	-2.02219	0.0954191	1.25881	0.887549	-0.489645	0.532865	-0.0806562	-1.51525	-2.04391	0.904979	0.0841155	-1.13559	4.09317	0.372856	4.16457	1.67997	0.755946	-3.29936	-1.501	-1.9489	1.72724	0.865123	-0.0227786	3.91155	-3.45617	39	2.36033	2.79653	-4.67782	-0.288795	3.77114	-0.101199	1.55624	2.82895	0.112232	1.43617	0.7337	-0.0407102	0.0528094	0.525655	0.147808	2.05592
40	-6.27044	0.792976	1.70878	1.02828	-0.276485	0.713064	3.31734	-1.50236	0.183752	0.535128	0.858261	-0.502655	0.613754	-0.0407445	-1.6327	-2.24473	1.00659	-0.0440926	-1.0424	3.93396	0.472834	4.0854	1.73019	1.12365	-3.16337	-1.30426	-2.00038	1.79481	0.75741	-0.15332	3.77913	-3.12331	40	3.67436	2.63243	-3.55662	-0.106774	3.53844	-0.0983385	1.44085	2.72475	0.0455269	1.66367	1.07138	-0.0301412	0.0591982	0.493405	0.149651	1.68336
41	-6.07056	0.671813	2.03239	0.942044	-0.238261	0.66993	3.01021	-1.1677	0.217401	-0.203419	0.774816	-0.570052	0.677865	-0.0336804	-1.66097	-2.48625	1.16904	-0.268799	0.178444	4.03572	0.357627	4.07246	1.78705	0.886286	-3.50547	-1.18551	-2.08007	1.91956	0.673442	-0.391208	3.68695	-2.19118	41	4.51943	2.34297	-2.56297	0.170656	3.14061	-0.101144	1.35695	3.02159	-0.0815405	1.91997	1.36517	0.0161886	0.0559951	0.439937	0.160205	1.3074
42	-5.60788	0.579497	2.27896	0.849617	-0.138262	0.644899	2.55668	-0.965968	0.179999	-0.812248	0.748076	-0.666477	0.769872	-0.00352438	-1.61515	-2.6234	1.29482	-0.255278	0.267986	4.11391	0.568989	3.86133	1.81655	0.60947	-3.08226	-1.07086	-2.39722	2.27322	0.615259	-0.740016	3.64759	-1.35261	42	5.15978	1.99371	-1.8062	0.542295	2.62575	-0.107101	1.35787	3.71809	-0.0671492	2.04681	1.68619	0.161843	0.0606287	0.354852	0.162764	0.968405
43	-5.00581	0.610512	2.29386	0.833643	0.0478367	0.639733	2.2024	-0.531638	-0.194494	-1.29809	0.756386	-0.713342	0.866987	0.0886465	-1.59112	-2.77114	1.52295	-0.129491	-0.113184	4.40104	0.495926	3.65964	1.88384	0.260305	-3.0283	-0.957766	-2.84576	2.69894	0.512381	-1.06087	3.72929	-0.993982	43	5.81991	1.77606	-1.29005	0.665871	2.14353	-0.115926	1.17643	4.85701	-0.0584121	2.11557	1.89879	0.355262	0.0517001	0.257288	0.154606	0.816511
44	-4.77792	0.61349	2.25681	0.961936	0.261527	0.621131	1.89217	-0.116879	-0.394727	-1.73054	0.78407	-0.705482	0.981207	0.183145	-1.5364	-2.83838	1.87526	0.0400763	-0.6316	4.71266	0.341894	3.68088	1.87486	0.176446	-3.30088	-1.00199	-3.27425	2.90978	0.373344	-1.52626	3.76217	-0.743931	44	6.12214	1.61417	-1.11112	0.686069	1.61891	-0.123263	0.816923	5.87954	-0.121695	2.21357	2.06902	0.5625	0.0194885	0.192034	0.152578	0.737037
45	-4.61089	0.445567	2.20653	0.895897	0.37506	0.610154	1.42664	0.0871811	-0.661602	-2.17441	0.877784	-0.680225	1.0383	0.242336	-1.42441	-2.83707	2.21618	0.129441	-1.23555	5.23635	-0.0125456	4.05099	1.75024	-0.042463	-3.38018	-1.28811	-3.671	3.0205	0.252423	-1.89454	3.89411	-0.270629	45	6.3372	1.56119	-1.00213	0.890081	0.819423	-0.126553	0.35903	6.41007	-0.152547	2.16977	2.20114	0.81035	0.0128712	0.323359	0.155375	0.772337
46	-4.54814	0.138272	2.19403	0.706556	0.413379	0.603363	0.835874	-0.0196735	-0.86871	-2.52669	1.06818	-0.627725	1.07824	0.264873	-1.27812	-2.61543	2.54659	0.146377	-1.05366	5.69687	0.316344	4.46017	1.6931	-0.069068	-3.75796	-1.29651	-4.07523	3.02706	0.118024	-1.86643	4.03772	0.139544	46	6.14328	1.52149	-1.20715	1.31959	-0.377506	-0.11635	0.190175	6.89645	-0.171859	2.17138	2.20995	1.02899	0.00292218	0.50739	0.138858	0.751041
47	-4.63254	-0.103984	2.1255	0.695193	0.419174	0.580531	0.611567	-0.376593	-1.01477	-2.66586	1.24169	-0.541394	1.15531	0.266906	-1.13631	-2.10469	2.79897	0.206391	-0.977652	6.11087	0.574691	4.93876	1.55294	-0.089027	-4.08813	-1.29313	-4.4154	2.8588	-0.0123744	-1.56682	4.08418	0.888909	47	5.74742	1.52321	-1.31582	1.87754	-1.13307	-0.102183	0.0358221	7.41975	-0.167742	2.17933	2.25034	1.14874	-0.00674389	0.683355	0.0965152	0.67893
48	-4.69635	-0.334834	2.06012	0.902672	0.376907	0.570728	0.751013	-0.804214	-0.90947	-2.55489	1.33188	-0.356087	1.23639	0.208139	-0.966913	-1.6042	2.94717	0.297322	-0.682539	6.42931	0.588883	5.62036	1.42774	-0.157377	-3.80102	-1.1722	-4.62017	2.51767	-0.136291	-1.42223	4.09784	1.07932	48	5.42931	1.59987	-1.34882	2.2138	-1.47366	-0.0893954	-0.244103	7.69686	-0.0851872	2.26398	2.28898	1.23666	-0.00903092	0.865311	0.0656548	0.520068
49	-4.76813	-0.485038	2.05044	1.15161	0.0484088	0.600182	0.863187	-1.11965	-1.00567	-2.37361	1.32102	-0.159367	1.32242	0.0881363	-0.760271	-1.27493	3.05579	0.36271	-0.163397	6.48849	0.441018	6.17166	1.34492	-0.209926	-2.9646	-0.830971	-4.67445	2.1223	-0.261673	-1.46979	3.94157	0.420957	49	4.98748	1.75384	-1.01901	2.34875	-1.83927	-0.0782796	-0.406914	7.59083	0.0285151	2.39313	2.23912	1.29478	0.00320909	1.03723	0.0119006	0.581236
50	-4.68057	-0.537624	2.0676	1.21529	-0.26726	0.629926	1.01043	-1.4606	-1.12467	-2.38175	1.30294	0.0111144	1.41819	-0.0259494	-0.637934	-1.04288	3.07612	0.278552	-0.308829	6.3693	0.11825	6.683	1.37632	-0.55218	-2.26787	-0.215238	-4.68115	1.81174	-0.355811	-1.35483	3.68057	-0.0163795	50	4.39809	1.95451	-0.863756	2.4768	-2.27706	-0.058396	-0.52503	6.90269	0.0668994	2.59919	2.06529	1.3361	0.0222103	1.28877	-0.0407932	0.803944
51	-4.50042	-0.647254	2.1248	1.14	-0.431353	0.643928	1.49303	-1.89834	-0.998419	-2.42296	1.23946	0.0852579	1.48198	-0.101955	-0.532013	-0.792357	3.04104	0.242777	-1.35437	5.97834	-0.0940849	7.36178	1.44173	-1.05219	-2.46781	0.383068	-4.71917	1.53374	-0.432281	-1.13251	3.2492	0.0993773	51	3.61101	2.08593	-0.862372	2.30941	-2.70445	-0.0390322	-0.518152	5.99515	0.125308	2.86059	1.88965	1.33269	0.00368803	1.52294	-0.10986	0.701366
52	-4.13041	-0.845141	2.1953	1.22447	-0.652565	0.661361	1.99581	-2.01871	-0.796447	-2.27671	1.20081	0.0457828	1.53443	-0.163362	-0.465412	-0.520382	3.05861	0.311443	-1.76068	5.39217	-0.476034	7.84999	1.4152	-1.66329	-3.03365	0.863496	-4.72055	1.17961	-0.498425	-1.27237	2.88107	-0.129603	52	2.70609	2.06838	-1.00357	1.93981	-3.05119	-0.0206109	-0.246407	5.3593	0.15016	2.9453	1.67549	1.25612	-0.0228137	1.64362	-0.170987	0.418936
53	-3.61297	-0.990579	2.18191	1.23876	-0.786386	0.673777	2.44356	-1.97295	-0.678705	-2.03569	1.15483	0.0281804	1.57347	-0.221767	-0.415886	-0.343574	3.17042	0.405405	-0.867989	5.13762	-0.690751	7.83057	1.45036	-1.85124	-2.68741	1.24248	-4.70615	0.865397	-0.552393	-1.24381	2.64407	-0.416475	53	1.94189	2.00375	-1.0114	1.65677	-3.24208	-0.00460933	-0.0537169	4.8715	0.139618	2.99571	1.44096	1.12802	-0.0624248	1.71412	-0.217516	0.0984215
54	-2.8011	-1.09103	2.16136	1.30398	-0.839253	0.673659	2.73598	-2.20841	-0.532608	-1.98073	1.09232	0.0228632	1.5852	-0.236458	-0.370897	-0.396088	3.30351	0.480076	0.111238	4.65843	-0.0575145	7.86023	1.42661	-1.81879	-2.39308	1.2142	-4.69216	0.614292	-0.609164	-1.42308	2.67243	-0.60399	54	1.45178	1.9587	-0.913157	1.36085	-3.1108	0.00679114	0.214455	4.2903	0.143554	3.09386	1.17962	0.999214	-0.079631	1.74589	-0.269206	-0.121086
55	-1.86789	-1.17941	2.17609	1.27604	-0.926775	0.680384	3.02401	-2.51239	-0.575718	-2.21954	1.04327	0.000524483	1.54428	-0.249468	-0.321748	-0.496381	3.17138	0.533777	0.664425	3.9729	0.912694	8.12749	1.25634	-1.56118	-2.43191	1.07684	-4.60409	0.507363	-0.658303	-1.91555	2.70362	-0.247181	55	1.11081	2.00792	-0.77947	1.14011	-3.17687	0.0134566	0.491994	3.67496	0.12819	3.2906	0.895916	0.913818	-0.0881983	1.72818	-0.369246	-0.371691
56	-1.12272	-1.39016	2.21488	1.55888	-0.919181	0.693829	3.1275	-2.764	-0.734846	-2.32354	0.963659	-0.0526792	1.45115	-0.208271	-0.281755	-0.619147	2.95443	0.576522	0.783225	3.43743	1.62002	8.53091	0.917693	-1.31072	-2.73029	1.22571	-4.37105	0.506151	-0.679441	-1.69226	2.69375	0.516771	56	0.778115	2.11179	-0.702961	0.920554	-3.55541	0.0087284	0.812575	2.98425	0.0878722	3.44581	0.638968	0.818913	-0.0988473	1.70431	-0.528023	-0.403803
57	-0.490347	-1.54103	2.23024	1.92469	-0.971008	0.715658	3.26552	-3.22576	-0.815925	-2.40567	0.879286	-0.126358	1.35771	-0.213169	-0.293596	-0.55543	2.8492	0.559851	0.445869	3.16536	1.22177	8.85514	0.632624	-1.29243	-3.03154	1.53321	-4.16762	0.449213	-0.673907	-1.23206	2.61816	1.19516	57	0.574179	2.11039	-0.6622	0.79713	-3.89789	0.00536345	0.991653	3.07533	0.0170797	3.55425	0.56757	0.703491	-0.0888287	1.7013	-0.628148	-0.229292
58	0.0925215	-1.68893	2.30056	2.26386	-0.969354	0.743115	3.62949	-3.48885	-0.709149	-2.50871	0.790405	-0.223628	1.29111	-0.236839	-0.353907	-0.371212	2.76069	0.468524	-0.0297066	2.96662	0.445	9.25608	0.382761	-0.975393	-2.76556	1.76352	-3.97988	0.453565	-0.646407	-1.2176	2.54926	1.65168	58	0.465465	1.9888	-0.526881	0.745645	-4.47858	0.00442359	0.893653	6.31757	0.0202712	3.58833	0.638278	0.599983	-0.058423	1.68707	-0.686927	-0.00392245
59	0.603941	-1.83541	2.34923	2.52809	-0.862267	0.730619	3.8094	-3.60153	-0.526665	-2.37048	0.664627	-0.28598	1.25101	-0.29813	-0.465388	-0.0731736	2.72731	0.564708	-0.414175	2.85424	0.170533	9.57416	0.116802	-0.49695	-2.65299	2.19093	-3.94263	0.439946	-0.618092	-1.29063	2.54762	2.04125	59	0.305274	1.91923	-0.760737	0.817036	-5.5899	0.00137542	0.791312	9.30883	0.0603221	3.62796	0.757449	0.506498	-0.00282161	1.70525	-0.766179	0.161871
60	0.939013	-2.04042	2.4109	2.70665	-0.778328	0.675955	3.86736	-3.88557	-0.383017	-2.29674	0.570548	-0.339941	1.21765	-0.402698	-0.550649	0.20336	2.64024	0.734585	0.215782	2.84645	-0.0277447	9.83402	-0.210129	-0.0989021	-2.49301	2.46721	-3.85156	0.36696	-0.555881	-1.13492	2.64273	1.76185	60	0.0968486	2.01475	-0.997897	0.733958	-6.38281	-0.0133044	0.72345	11.5831	0.095879	3.69433	0.771203	0.425195	0.0467725	1.69772	-0.887121	0.257499
61	1.13659	-2.15079	2.55064	2.67932	-0.736286	0.600656	4.2181	-4.17506	-0.717249	-2.17801	0.511866	-0.301339	1.17085	-0.514629	-0.58439	0.359436	2.61471	0.724431	0.997494	2.86454	0.401785	9.92362	-0.542725	0.134016	-1.69361	2.58239	-3.74611	0.310861	-0.419378	-0.975401	2.84461	1.36441	61	-0.0735486	2.2619	-1.22199	0.735122	-7.12022	-0.0252182	0.655007	13.4533	0.025666	3.6118	0.722578	0.351953	0.101368	1.64015	-0.976811	0.128831
62	1.08509	-2.19904	2.61286	2.72143	-0.702688	0.532463	4.84221	-4.68677	-1.02797	-1.97103	0.440243	-0.197741	1.10705	-0.613092	-0.597562	0.358292	2.67106	0.662404	0.953479	3.02162	1.05186	9.68483	-0.846505	0.339223	-0.960121	3.0179	-3.64407	0.318568	-0.275009	-0.237625	3.16531	0.486321	62	-0.128512	2.46659	-1.37274	0.749483	-7.75485	-0.0375925	0.716846	14.34	-0.0396959	3.47473	0.678207	0.307782	0.173385	1.5756	-1.00876	-0.0550146
63	0.97619	-2.42287	2.56025	2.71655	-0.653476	0.492389	5.40824	-5.19333	-0.837929	-1.82841	0.399926	-0.108132	1.07987	-0.705203	-0.62807	0.151804	2.73642	0.612091	-0.298651	3.14315	0.974207	9.53491	-1.14279	0.485685	-0.679948	3.29057	-3.56024	0.325902	-0.166239	0.177462	3.52055	-0.558545	63	-0.108549	2.53109	-1.42052	0.60336	-8.09821	-0.0440053	0.963525	14.3768	-0.102981	3.42062	0.549827	0.268232	0.215315	1.60018	-1.04028	-0.064081
64	0.914191	-2.67865	2.35186	2.60913	-0.600361	0.47491	5.90769	-5.24081	-0.464989	-1.66625	0.374396	-0.0317082	1.06798	-0.73969	-0.634565	-0.0334154	2.70535	0.468151	-0.633104	3.01147	0.867835	9.81875	-1.35216	0.436118	-0.0593179	3.14678	-3.44309	0.382242	-0.09182	0.242084	3.75306	-1.33065	64	-0.00955938	2.66096	-1.5914	0.594109	-8.22749	-0.0442886	1.29272	13.9636	-0.13399	3.51162	0.350058	0.267325	0.224524	1.80583	-1.0338	-0.0729572
65	0.81184	-2.97541	2.14384	2.51712	-0.450886	0.44513	5.89642	-5.2046	-0.342589	-1.56846	0.407276	-0.0120882	1.06487	-0.726578	-0.609585	-0.0826331	2.8185	0.498927	-0.819977	2.87981	0.681666	10.0503	-1.60214	0.00990863	0.108874	3.18454	-3.32553	0.440414	-0.086078	-0.225688	3.85655	-1.76257	65	0.0451162	2.86976	-1.67366	0.662224	-8.44484	-0.0542102	1.54861	12.902	-0.0687599	3.54112	0.288786	0.326536	0.210273	2.19769	-1.00419	-0.00248765
66	0.803609	-3.19435	2.19612	2.51496	-0.260474	0.413019	5.80539	-5.16643	-0.26131	-1.42521	0.448156	-0.0586924	1.06183	-0.709641	-0.569931	-0.0236814	2.88496	0.505352	-1.14932	2.71568	0.62353	10.4267	-1.88751	-0.559561	-0.284688	2.86233	-3.29588	0.44768	-0.160427	-0.494411	4.04285	-2.89761	66	0.112623	3.03936	-1.7766	0.17553	-8.60667	-0.0599289	1.71827	11.1466	-0.0265045	3.41141	0.350244	0.435181	0.196858	2.28144	-0.985993	0.149424
67	0.784634	-3.2931	2.41883	2.46325	-0.141604	0.421268	5.63205	-4.74594	-0.166749	-1.27039	0.455417	-0.13743	1.07759	-0.696603	-0.537322	0.12103	3.01216	0.385559	0.0882666	2.41125	1.18556	10.2429	-2.11363	-0.84099	-0.270635	2.10466	-3.27787	0.437649	-0.257657	-1.42773	3.96326	-4.0365	67	0.13539	3.12332	-2.09284	-0.0125542	-8.54749	-0.0625301	1.74484	9.07781	-0.0122093	3.11938	0.336229	0.532512	0.183287	2.2967	-1.01397	0.361344
68	0.683601	-3.26793	2.80194	2.38084	-0.085432	0.443256	5.11324	-3.87168	-0.279731	-1.04397	0.487479	-0.216983	1.10738	-0.652688	-0.51264	0.187375	3.23583	0.238549	1.3177	2.01819	1.58091	9.65702	-2.31533	-0.759921	0.271183	1.75123	-3.37914	0.412027	-0.330095	-2.75575	3.6228	-5.23444	68	0.205623	3.10676	-2.31951	0.20757	-8.03687	-0.0270072	1.63483	7.17233	-0.00481115	2.85533	0.308374	0.581618	0.102476	2.49034	-1.06122	0.726058
69	0.565276	-3.19973	3.2131	2.2967	-0.131822	0.421497	4.28623	-2.46992	-0.510472	-0.654056	0.541891	-0.342008	1.10876	-0.581399	-0.47753	0.199621	3.3447	0.170513	2.4931	2.03449	1.98163	9.3325	-2.50389	-0.590196	0.883648	1.16973	-3.59992	0.314263	-0.393403	-3.40934	3.25313	-5.89279	69	0.120512	3.12148	-2.45569	0.34696	-7.09219	0.0572657	1.59325	5.41724	-0.031758	2.69341	0.324802	0.619646	0.0441159	3.00331	-1.20689	0.955453
70	0.379521	-3.0247	3.43892	2.31812	-0.117104	0.349412	3.44791	-1.25468	-0.914896	-0.321856	0.602084	-0.440969	1.12848	-0.486264	-0.465891	0.375228	3.38936	0.149464	4.13685	2.2324	2.2943	9.24567	-2.69102	-0.164415	1.37988	0.728374	-3.78105	0.143505	-0.431931	-3.63548	3.17416	-5.77224	70	0.0677831	3.25467	-2.5101	0.0677665	-6.03263	0.12741	1.62794	4.51598	-0.101628	2.33821	0.210077	0.639961	0.060993	3.52772	-1.37747	1.05569
71	0.0990841	-2.89414	3.54116	2.42595	-0.0753943	0.306225	2.9548	-0.711286	-1.06257	-0.0397808	0.686232	-0.520533	1.16013	-0.358827	-0.498035	0.524388	3.50193	0.204081	4.74035	2.47611	2.72578	9.17249	-2.83865	0.175388	2.09269	0.288802	-4.10267	0.0447715	-0.485423	-3.70596	3.1632	-5.68541	71	0.0584385	3.39984	-2.66054	-0.0797956	-5.69023	0.185582	1.64071	4.0947	-0.184206	1.73026	-0.0397868	0.648491	0.114004	3.98496	-1.57044	1.19854
72	-0.16246	-2.76401	3.61575	2.43016	0.0246335	0.264549	2.58113	-0.478198	-1.14758	0.0120755	0.693054	-0.611042	1.19347	-0.316751	-0.516115	0.584631	3.72935	0.251173	4.63012	2.77535	3.15827	9.1283	-2.76063	0.407652	2.70285	0.237251	-4.54241	-0.0291188	-0.53591	-3.23413	3.19606	-5.66205	72	-0.0298312	3.59589	-2.94327	-0.0714576	-6.21897	0.239018	1.5347	4.324	-0.21335	1.10998	-0.387635	0.697325	0.0245616	4.05291	-1.69446	1.08956
73	-0.387139	-2.6823	3.61751	2.25282	0.127725	0.249945	2.12347	-0.0540075	-1.0939	0.260436	0.635005	-0.760737	1.19977	-0.347225	-0.528618	0.556087	4.13593	0.485757	4.32906	3.41043	3.78519	8.70351	-2.57003	0.446137	2.79982	0.479921	-4.88979	-0.150998	-0.614876	-2.67785	2.82371	-5.34659	73	-0.193227	3.86258	-3.20828	-0.0943284	-6.36935	0.278772	1.35398	5.34907	-0.17675	0.477608	-0.644911	0.771044	-0.148315	4.05339	-1.77608	0.783754
74	-0.572954	-2.7395	3.55935	2.10768	0.159268	0.245659	1.45296	0.350582	-0.786451	0.579429	0.548924	-0.945326	1.21208	-0.392945	-0.57461	0.570685	4.58104	0.578197	3.5911	4.22115	4.73915	8.39516	-2.484	0.570724	2.52386	0.876768	-5.08921	-0.172923	-0.71219	-2.49625	2.22549	-5.67477	74	-0.482301	4.26138	-3.32711	-0.189191	-5.97363	0.287592	1.19895	5.55661	-0.0395159	-0.181962	-0.863661	0.801272	-0.272668	4.23514	-1.8947	0.504858
75	-0.635641	-2.81664	3.39253	1.92244	0.101302	0.235222	0.737266	0.489612	-0.255347	0.897713	0.483608	-1.00286	1.26788	-0.511762	-0.59915	0.515201	4.91103	0.542793	3.28052	5.02812	4.66796	8.51726	-2.64546	0.762635	1.19992	1.32333	-5.28297	-0.19842	-0.848289	-2.8128	1.74749	-6.14476	75	-0.811512	4.63212	-3.19152	-0.0063658	-5.59998	0.243646	1.19249	5.64979	0.0399151	-0.789634	-1.05828	0.77988	-0.284631	4.66435	-1.9522	0.332914
76	-0.620594	-2.83626	3.19807	1.73011	0.0636433	0.232148	-0.0439051	0.337341	-0.254104	1.12895	0.501138	-0.803735	1.36162	-0.698076	-0.669271	0.386915	5.11849	0.452478	4.57795	5.54763	4.90231	8.71646	-2.85668	0.948319	-0.549697	1.89067	-5.39709	-0.283348	-0.964619	-2.99562	1.66011	-5.42827	76	-1.05594	4.82427	-3.01317	0.0993001	-5.1689	0.243813	1.35071	5.35906	0.0616903	-1.64741	-1.11763	0.770264	-0.228842	5.17119	-1.90617	0.350702
77	-0.592589	-2.81639	3.09611	1.5068	0.131828	0.25194	-0.769718	0.736947	-0.54883	1.24517	0.48941	-0.538666	1.45397	-0.849449	-0.738978	0.28952	5.16991	0.189135	6.00421	5.76269	4.94623	8.75925	-3.10855	0.793922	-2.1948	1.99567	-5.4585	-0.283831	-1.05615	-3.58041	1.57262	-4.58731	77	-1.20919	4.86338	-2.9786	0.13428	-4.66311	0.24272	1.35256	5.12479	0.0819795	-2.57247	-1.03601	0.821659	-0.355322	5.7831	-1.75187	0.563019
78	-0.576883	-2.8025	2.89565	1.34178	0.209277	0.269094	-1.27447	1.81797	-0.317254	1.2558	0.369936	-0.171344	1.54818	-0.947065	-0.765472	0.282745	5.06961	-0.0862554	6.62099	5.80606	5.74917	8.85913	-3.25714	0.499369	-3.38244	1.73868	-5.4901	-0.288644	-1.19487	-3.84999	1.55521	-4.10363	78	-1.32801	4.87169	-2.89467	0.26516	-4.30474	0.212865	1.27455	5.0695	0.0627027	-3.35108	-0.882783	0.903148	-0.650343	6.20923	-1.55628	0.74827
79	-0.600573	-2.84926	2.75256	1.18764	0.270313	0.268479	-1.6002	3.05684	-0.246186	1.35909	0.293658	0.241334	1.59524	-1.0199	-0.749472	0.292432	4.77565	-0.160854	5.74915	5.86815	7.71857	8.58952	-3.18524	0.236307	-3.65052	1.33495	-5.58921	-0.359477	-1.36613	-3.60874	1.65803	-3.85098	79	-1.33413	4.7475	-2.81069	0.675122	-3.82986	0.153068	1.15204	4.29925	0.00198227	-3.92692	-0.826418	0.914989	-0.962048	6.39718	-1.34879	0.833667
80	-0.655938	-2.79764	2.46577	0.964957	0.265696	0.261701	-2.08833	4.14489	-0.141541	1.51173	0.257695	0.731383	1.59301	-1.03617	-0.751734	0.39976	4.46749	-0.183586	4.51826	5.59043	8.81466	8.23759	-2.92558	-0.0991897	-4.29602	1.05511	-5.82321	-0.40359	-1.48791	-3.80215	1.46968	-3.33453	80	-1.37048	4.48015	-2.84008	1.04339	-3.30332	0.0694	1.04772	3.69374	-0.0797395	-4.72074	-0.76664	0.828533	-1.28257	6.47891	-1.14339	0.736482
81	-0.752538	-2.70284	1.96995	0.751623	0.219678	0.260837	-2.71139	4.87162	0.195042	1.42861	0.226454	1.20766	1.55557	-1.00799	-0.815097	0.704367	4.37971	-0.183102	3.58294	5.24166	9.16251	7.5911	-2.6972	-0.305123	-4.39013	1.41406	-5.89705	-0.464868	-1.53346	-4.33009	1.28765	-2.4127	81	-1.5537	4.2121	-2.97769	1.61142	-2.86269	-0.00349696	0.941239	2.67759	-0.18878	-5.34656	-0.651633	0.680527	-1.54399	6.20163	-0.94272	0.605925
82	-0.685548	-2.63121	1.41513	0.57155	0.142915	0.259142	-3.38993	5.01974	0.193981	1.35616	0.171526	1.60302	1.52566	-0.905065	-0.951627	1.01052	4.5984	-0.226503	3.24551	4.69769	7.39753	7.14751	-2.53234	-0.383161	-3.4636	1.40561	-5.80782	-0.479526	-1.52498	-4.46542	0.734335	-1.62463	82	-1.69969	3.76039	-3.33541	2.16462	-2.50128	-0.0702591	0.827034	1.74525	-0.233683	-5.74111	-0.437747	0.562166	-1.77926	5.64655	-0.770644	0.520053
83	-0.333074	-2.67381	0.885334	0.183167	0.0205916	0.239935	-3.86175	4.87977	0.39091	1.24054	0.134649	1.92814	1.47482	-0.908021	-1.06667	1.17056	4.85263	-0.119105	2.98272	4.16449	6.6962	7.53373	-2.45184	-0.46353	-2.91806	1.29709	-5.93116	-0.488854	-1.53012	-4.61795	0.300908	-1.39114	83	-1.77859	3.32262	-3.94474	2.59346	-2.2143	-0.143899	0.697341	0.790974	-0.268461	-5.88388	-0.205891	0.470207	-2.0918	5.01897	-0.573201	0.385207
84	0.262007	-2.7626	0.367446	-0.176382	-0.044032	0.226014	-3.63698	4.80674	0.492512	1.13322	0.0914113	2.21943	1.46519	-0.965845	-1.16892	1.48935	5.15327	0.25633	2.90183	3.52798	6.39136	7.94749	-2.58103	-0.354942	-1.82191	1.55487	-6.19212	-0.475629	-1.52197	-5.50951	-0.296746	-0.968403	84	-1.87353	2.79342	-4.29901	2.78265	-1.93604	-0.240979	0.527809	0.13244	-0.258819	-5.87504	-0.020704	0.414802	-2.27783	4.17722	-0.409669	0.203997
85	0.91952	-2.94051	-0.0540922	-0.367437	-0.0446809	0.225034	-2.97794	4.82868	0.473763	1.18957	0.0494258	2.43789	1.44078	-0.990812	-1.2841	1.80151	5.34701	0.56812	2.926	3.09644	6.12122	7.60131	-2.74374	-0.259179	-0.397862	1.65871	-6.58195	-0.470098	-1.49576	-5.83132	-0.864241	-0.618745	85	-2.21497	2.26903	-4.26843	2.85347	-1.68154	-0.336222	0.347991	-0.218173	-0.238866	-5.58494	0.208934	0.395986	-2.28868	3.24164	-0.388473	0.180494
86	1.76494	-2.99831	-0.299733	-0.381226	-0.225463	0.233803	-2.34145	5.1654	0.21833	1.26512	0.0309164	2.48365	1.3851	-1.02302	-1.41579	2.12371	5.4962	0.780556	2.66729	2.66856	7.23862	7.13332	-2.70616	-0.22785	0.340749	1.66577	-7.08542	-0.437424	-1.44698	-6.48727	-0.719818	-0.716872	86	-2.60825	1.82063	-4.16382	2.96636	-1.40402	-0.418181	0.104509	-0.324538	-0.186923	-5.28577	0.526933	0.386355	-2.15027	2.36865	-0.441028	0.233709
87	2.5316	-3.06103	-0.528774	-0.374444	-0.407396	0.247355	-1.58973	5.37233	-0.250765	1.07513	0.0611075	2.45616	1.3555	-1.02266	-1.56026	2.29797	5.66966	0.982048	2.52138	2.41911	7.28188	6.52312	-2.54401	-0.325174	0.569498	1.68047	-7.42516	-0.294681	-1.42656	-6.53776	-0.454541	-0.713695	87	-3.13129	1.46426	-4.00878	3.00773	-1.07647	-0.519249	-0.0818852	-0.222046	-0.198459	-4.98544	0.776213	0.33697	-2.02473	1.54948	-0.490093	0.30687
88	3.28421	-3.11713	-0.740659	-0.377964	-0.490133	0.249455	-1.03022	5.78384	-0.332713	1.03161	0.141012	2.44407	1.35852	-0.940969	-1.6752	2.41156	5.8736	1.08172	2.31309	2.01555	8.03696	6.10357	-2.43362	-0.439362	-0.0887529	1.47993	-7.73045	-0.163078	-1.36923	-6.01259	0.232537	-1.57316	88	-3.77567	1.14901	-3.71166	2.98032	-0.622594	-0.617205	-0.171223	-0.0253583	-0.227448	-4.65302	0.991639	0.277442	-2.16879	0.824785	-0.477374	0.259026
89	3.8571	-3.19897	-0.970365	-0.368261	-0.46049	0.238961	-0.774875	6.37754	-0.398039	1.11145	0.171557	2.5268	1.37613	-0.863998	-1.76574	2.3297	6.04011	1.24107	2.06096	1.44098	7.60476	6.2761	-2.32656	-0.826818	-0.92107	1.33474	-7.96791	-0.0541652	-1.29615	-5.64338	0.297947	-2.73793	89	-4.28759	0.867238	-3.27574	2.86204	-0.0461753	-0.699962	-0.299511	-0.159418	-0.222701	-4.02771	1.14561	0.177516	-2.305	0.030193	-0.41979	0.21247
90	4.44305	-3.16123	-1.08155	-0.368709	-0.370191	0.222509	-0.774263	7.37967	-0.522684	1.39593	0.223956	2.55432	1.3981	-0.834923	-1.77558	2.06033	6.0896	1.23156	2.14172	1.28836	7.39843	6.42792	-2.22713	-1.24793	-1.22495	1.24375	-8.29398	0.163278	-1.23354	-5.72548	0.211194	-3.20022	90	-4.45724	0.754657	-2.77198	2.55433	0.420745	-0.810488	-0.375364	-0.18473	-0.148624	-3.39253	1.27116	0.116911	-2.2058	-0.910702	-0.3319	0.127989
91	4.83675	-3.15179	-1.03575	-0.36672	-0.211724	0.213769	-0.643994	8.62532	-0.704091	1.51419	0.32946	2.36231	1.3898	-0.854375	-1.7264	1.85146	6.14789	1.31574	2.87461	1.50317	7.3169	6.40183	-2.15831	-1.69355	-1.41444	1.46459	-8.73647	0.320669	-1.19699	-5.88656	-0.478742	-3.69968	91	-4.17119	0.763664	-2.41417	2.28316	1.02473	-0.988696	-0.3159	0.0733104	-0.0869631	-2.55271	1.41453	0.0540571	-1.92189	-1.76768	-0.266374	-0.0214699
92	5.16455	-3.1992	-0.969559	-0.405851	-0.0578666	0.195661	-0.725538	10.8009	-0.741783	1.26939	0.441441	2.11282	1.28779	-0.950013	-1.71336	1.67636	6.20416	1.3425	2.76764	1.83143	6.89375	6.43583	-2.12545	-1.95198	-1.36349	1.92648	-9.12047	0.516979	-1.18733	-5.98933	-1.02696	-4.10223	92	-3.70694	0.775121	-2.21125	2.33354	1.66808	-1.22719	-0.156183	0.379324	-0.0523136	-1.73776	1.51924	-0.0550379	-1.69878	-2.5535	-0.16721	-0.173152
93	5.21637	-3.37561	-0.97883	-0.34661	0.0688283	0.183245	-0.785596	13.4572	-0.957557	0.93661	0.502519	1.96607	1.17902	-1.06399	-1.70588	1.51013	6.263	1.31182	2.582	2.31328	5.97434	6.09805	-1.95505	-1.98239	-2.34104	2.43566	-9.21224	0.732773	-1.14418	-5.92603	-1.30238	-4.70947	93	-3.70644	0.75197	-1.93482	2.3623	2.30638	-1.46255	0.0195609	0.879241	-0.0581365	-1.08091	1.55675	-0.212652	-1.634	-3.21846	-0.0515178	-0.310151
94	5.13287	-3.48421	-1.02468	-0.270759	0.0335217	0.162394	-0.536471	15.9956	-1.0038	0.356427	0.536504	1.75189	1.08018	-1.2462	-1.70066	1.34264	6.44715	1.21827	3.47068	2.90386	5.15469	5.45036	-1.72759	-1.98573	-3.55768	2.838	-9.21309	0.910158	-1.06791	-5.75624	-1.52454	-4.36341	94	-4.28169	0.727541	-1.54371	2.45409	3.05037	-1.61925	0.207732	1.36421	-0.0503056	-0.311127	1.57622	-0.342852	-1.50943	-3.82571	0.0444269	-0.347656
95	4.77706	-3.46074	-0.897964	-0.238508	-0.116065	0.121499	-0.0426496	17.7764	-1.35344	-0.193729	0.525641	1.45493	1.10661	-1.33536	-1.67767	1.24997	6.77965	1.28056	3.16229	3.3241	4.36948	5.0857	-1.55914	-2.16717	-4.33849	3.00304	-9.45256	1.19995	-1.01585	-5.75449	-1.5876	-4.01811	95	-4.86894	0.774374	-1.09797	2.65489	4.21001	-1.67566	0.404686	2.05149	0.0319033	0.551657	1.60488	-0.521451	-1.26899	-4.31419	0.180395	-0.443193
96	4.29201	-3.42386	-0.748155	-0.232096	-0.160193	0.0724954	0.254463	19.377	-1.34813	-0.468978	0.48888	1.20133	1.13432	-1.28204	-1.60331	1.25935	6.96262	1.22644	2.87039	3.84044	5.43529	5.04249	-1.45297	-2.42717	-4.12041	2.84121	-9.85598	1.43874	-0.97786	-5.79673	-1.60071	-4.13379	96	-5.29561	0.796264	-0.689978	2.82435	5.16058	-1.71196	0.487808	2.98971	0.092144	1.34149	1.69951	-0.788122	-0.957649	-4.60612	0.344736	-0.540829
97	3.71831	-3.4472	-0.628428	-0.217283	-0.11086	0.0387749	0.751881	20.2571	-1.0259	-0.536892	0.487412	1.01391	1.12951	-1.23653	-1.50819	1.2996	6.85033	0.968648	2.32534	4.43812	6.19865	5.04296	-1.41814	-2.44216	-3.41474	2.50226	-10.1301	1.58744	-1.03452	-5.84328	-1.88404	-3.56855	97	-5.38361	0.857226	-0.248417	2.85547	5.54829	-1.71623	0.477613	3.78248	0.114975	2.01242	1.73946	-1.03831	-0.657739	-4.64967	0.490928	-0.551291
98	3.14416	-3.3842	-0.418579	-0.255033	-0.0830328	0.0295149	1.43135	20.396	-0.822864	-0.39984	0.504313	0.885594	1.15399	-1.22705	-1.50783	1.27124	6.70206	0.795423	1.41705	4.96854	6.31386	5.41012	-1.29591	-2.38609	-3.24703	1.90465	-10.1142	1.55524	-1.13828	-6.13894	-2.26259	-2.64008	98	-5.21239	0.912892	0.177354	2.63833	5.71311	-1.69262	0.413995	4.30649	0.147699	2.54925	1.65005	-1.23845	-0.399368	-4.50651	0.664557	-0.571468
99	2.55887	-3.28353	-0.0991235	-0.239881	-0.164695	0.0321	1.97488	19.8009	-0.508805	-0.104399	0.463848	0.802409	1.23212	-1.14862	-1.50516	1.16795	6.47031	0.677236	0.545933	5.18246	7.21084	5.4273	-1.07399	-2.17364	-1.92927	1.26066	-9.81602	1.54845	-1.26469	-5.56356	-1.99112	-1.64557	99	-5.16419	1.03482	0.525279	2.4713	5.70941	-1.69413	0.299956	5.06683	0.130547	3.08017	1.49912	-1.48573	-0.236238	-4.2246	0.782832	-0.5953
100	1.9153	-3.13845	0.334199	-0.217309	-0.47424	0.0364529	2.02482	18.7633	-0.370957	0.218109	0.389513	0.807298	1.26295	-1.11937	-1.47548	1.02975	6.16999	0.5849	-0.711956	5.10611	5.74376	4.5068	-0.96654	-1.91412	-1.22442	1.15025	-9.46683	1.4238	-1.36125	-4.75067	-1.24101	-0.974913	100	-5.19986	1.1511	0.837311	2.47284	5.60061	-1.688	0.167075	6.00179	0.0959086	3.49967	1.30218	-1.84027	-0.0837159	-3.84245	0.847645	-0.565544
[truncated: 49 more columns]

## Sheet: Serratus Anterior Differences
COMB	C = CONTROL		P = PAIN																															Overhead Reach
% Motion	C02R	C03R	C04R	C06R	C07R	C10R	C12R	C18R	C21R	C02L	C03L	C04L	C06L	C07L	C10L	C12L	C18L	C21L	P01R	P04R	P05R	P06R	P07R	P08R	P09R	P01L	P02L	P03L	P04L	P05L	P06L	P07L	P09L	% Motion	C02R	C03R	C04R	C06R	C07R	C10R	C12R	C18R	C21R	C02L	C03L	C04L	C06L	C07L	C10L
1	0.647592	0.4475	0.0936944	-0.47043	-0.00459463	-0.157625	0.705403	5.14391	-1.17785	0.0704371	0.43433	-0.363192	1.30991	0.333338	-0.313064	-0.690457	-1.02793	-0.826319	0.494278	0.0628255	-0.0951822	0.246419	-0.470841	0.25478	1.14964	-0.181581	0.0551034	-0.327485	0.896151	-0.229552	1.18153	-0.336596	2.44302	1	-1.14142	1.58119	-2.65944	5.12439	-2.26863	-1.60359	-2.5964	-1.44719	-0.0338639	-2.56617	-1.25744	-6.72165	1.11779	-3.62137	-0.863258
2	0.683022	0.496753	0.202054	-0.658589	-0.110024	-0.154555	0.808493	4.54019	-0.885573	-0.0351225	0.341784	-0.0921812	1.35674	0.586849	-0.364822	-0.528825	-0.939175	-0.648568	0.535404	0.250414	-0.1163	0.309382	-0.463637	0.159527	0.967748	-0.205472	0.186192	-0.255457	0.701345	-0.188857	1.54584	-0.464824	2.68309	2	-1.31619	1.49805	-3.6597	4.00729	-2.41111	-1.5203	-2.49931	-1.46257	0.0116909	-2.1226	-1.06786	-6.697	0.953614	-2.62807	-0.922505
3	0.591416	0.516534	0.339479	-0.606619	-0.218139	-0.145484	0.931778	3.8843	-0.596337	-0.0548324	0.205801	0.23528	1.3045	0.941699	-0.377292	-0.342327	-0.740767	-0.471774	0.545899	0.455748	-0.130846	0.206484	-0.501213	0.101726	0.66203	-0.209716	0.226837	-0.150897	0.561759	-0.152648	1.05329	-0.692642	2.85433	3	-1.51074	1.52219	-5.4791	3.29287	-2.46767	-1.4799	-2.31684	-1.52872	-0.026712	-2.08239	-0.855347	-6.62146	0.499328	-2.12277	-0.974526
4	0.501372	0.554319	0.469386	-0.405814	-0.244902	-0.117538	1.04524	3.12614	-0.534448	0.0601385	0.0877675	0.504699	1.05675	1.31676	-0.352015	-0.175721	-0.494905	-0.177528	0.577957	0.526293	-0.137398	-0.0386896	-0.51114	0.0817599	0.461563	-0.194018	0.131513	-0.0610088	0.542704	-0.146938	0.87476	-0.872064	2.8155	4	-1.77764	1.52652	-7.63919	2.69968	-2.41285	-1.43307	-1.99129	-1.71697	-0.0440917	-2.03434	-0.668442	-6.61536	0.0624185	-1.57636	-1.02528
5	0.466885	0.530625	0.616477	-0.319425	-0.239076	-0.0916225	1.04819	2.2812	-0.407541	0.161512	0.0808005	0.72067	0.92003	1.56828	-0.311453	-0.041534	-0.246629	0.290843	0.673896	0.582892	-0.135803	-0.00464541	-0.459008	0.0975717	0.316611	-0.226707	-0.0774332	0.0391716	0.566939	-0.180709	1.09874	-0.92319	2.62774	5	-2.07733	1.47732	-8.75149	2.18194	-2.32445	-1.34303	-1.17295	-2.13813	-0.00469735	-1.56221	-0.492222	-6.68346	-0.138591	-0.570327	-1.0601
6	0.401924	0.473362	0.662428	0.19896	-0.216623	-0.0912425	0.820278	1.41018	-0.216355	0.264704	0.154038	0.868641	0.95914	1.60719	-0.265805	0.0776107	-0.0323083	0.342666	0.64844	0.568116	-0.122656	0.0473122	-0.391449	0.131385	0.222729	-0.321774	-0.328291	0.0623415	0.5537	-0.202114	1.2627	-0.732982	2.37216	6	-2.39889	1.48648	-8.95044	2.03846	-2.10771	-1.27896	-0.17731	-2.17723	0.0399428	-0.802328	-0.29085	-6.74501	-0.122687	0.495951	-1.03929
7	0.330264	0.432995	0.651464	0.644981	-0.265503	-0.114718	0.569919	0.686716	-0.0732784	0.49452	0.230672	0.888913	0.997035	1.43311	-0.233409	0.17856	0.185479	-0.051318	0.464796	0.518786	-0.107215	0.357199	-0.334666	0.187822	0.11378	-0.359595	-0.536697	0.133143	0.517883	-0.202678	1.25096	-0.33001	1.99432	7	-2.63113	1.41036	-8.41759	1.99237	-1.75708	-1.26472	0.324399	-1.92396	0.0604198	-0.477349	-0.0890532	-6.75991	-0.172901	1.17989	-0.960362
8	0.314135	0.381937	0.666948	0.551884	-0.261783	-0.122894	0.408594	0.223681	-0.0401521	0.729821	0.338135	0.81474	0.987371	1.24197	-0.190796	0.247492	0.402087	-0.331656	0.357119	0.465961	-0.10244	1.25867	-0.317238	0.200448	0.141938	-0.349717	-0.663664	0.187621	0.613719	-0.213052	1.00981	0.0824991	1.64304	8	-2.92354	1.19028	-7.59829	1.73831	-1.26463	-1.21573	0.247115	-1.53618	0.208567	-0.441602	0.129619	-6.64443	-0.289721	1.5005	-0.902838
9	0.224037	0.402544	0.648204	0.345916	-0.223768	-0.122326	0.221984	0.017884	0.102574	0.975372	0.503504	0.751172	0.819952	1.16176	-0.146977	0.329679	0.586909	-0.21492	0.250431	0.468185	-0.0791092	1.65228	-0.368804	0.176166	0.246285	-0.353467	-0.6791	0.172932	0.743996	-0.208754	1.01712	0.515978	1.47936	9	-3.01602	0.954497	-6.99786	1.48775	-0.734263	-1.1195	-0.453678	-1.02104	0.010609	-0.546651	0.292503	-6.52466	-0.340175	1.07628	-0.892515
10	0.126035	0.40543	0.645881	-0.284591	-0.192249	-0.146163	0.0287287	-0.0919112	0.340815	0.934466	0.701071	0.750535	0.492946	1.14461	-0.10925	0.459951	0.731104	0.0276848	0.161023	0.508088	-0.0197338	1.46002	-0.3568	0.147181	0.418212	-0.372527	-0.640077	0.186444	0.757331	-0.195917	0.941679	0.848658	1.38705	10	-3.04299	0.807798	-6.23936	1.30614	-0.376679	-1.01403	-1.40013	-0.51707	-0.219123	-0.908776	0.267377	-6.40601	-0.479961	0.34237	-0.843524
11	0.0973395	0.423112	0.700829	-0.820985	-0.189543	-0.201901	-0.147843	-0.0396827	0.484694	1.04239	0.885984	0.819726	0.204456	1.17191	-0.0471227	0.557282	0.786013	0.174831	0.0956113	0.706774	0.0531361	0.89795	-0.31064	0.114908	0.824476	-0.402927	-0.539143	0.317664	0.834836	-0.185446	0.630765	1.03734	1.20634	11	-3.07666	1.00262	-5.50784	1.3841	-0.158519	-0.995995	-2.36176	-0.0152379	-0.571962	-1.21905	0.134269	-6.31511	-0.453659	-0.776056	-0.794802
12	0.128249	0.412919	0.84631	-1.29583	-0.233033	-0.203489	-0.366041	0.323614	0.49138	1.16546	1.07722	0.916242	-0.096954	1.19173	0.0109026	0.550249	0.701096	0.364579	-0.0123194	0.987793	0.11408	0.0580748	-0.227018	0.120216	0.963161	-0.469372	-0.498685	0.559527	0.933083	-0.224142	-0.139678	1.1175	0.996436	12	-3.07056	1.42779	-5.38465	1.11724	-0.143551	-1.00392	-3.18097	0.248756	-0.953496	-1.38033	0.149828	-6.2749	-0.400517	-1.7667	-0.767217
13	0.154006	0.317044	1.09229	-1.83093	-0.258412	-0.172458	-0.43919	0.80435	0.492673	1.40413	1.20732	0.963516	-0.18781	1.2287	0.0738073	0.518119	0.552828	0.635474	-0.085541	1.13252	0.169011	-0.156965	-0.168097	0.173566	0.919557	-0.528355	-0.489635	0.863998	1.01694	-0.312316	-0.371603	1.13681	0.779285	13	-3.01769	1.9447	-4.97738	0.605885	-0.265105	-0.994085	-3.90349	0.496598	-1.40721	-1.52015	0.183185	-6.32666	-0.415642	-1.73977	-0.735966
14	0.109384	0.140941	1.3898	-1.59445	-0.248673	-0.125012	-0.273668	1.27735	0.526601	1.32936	1.2998	0.99535	-0.0445405	1.14743	0.115339	0.485647	0.398731	0.992652	-0.154635	1.1289	0.227514	0.366341	-0.210624	0.274913	1.09147	-0.570453	-0.578103	1.12907	1.00917	-0.428163	-0.348839	1.09305	0.696492	14	-2.82495	2.44747	-4.57231	-0.215055	-0.246565	-0.979134	-4.95074	0.513607	-1.57244	-1.51697	0.198408	-6.48871	-0.215605	-1.7619	-0.753934
15	-0.0157128	-0.0950567	1.67645	-1.65019	-0.212422	-0.0765242	-0.0388623	1.66587	0.429275	1.18675	1.39337	1.0272	0.352109	1.06162	0.131157	0.46305	0.277913	1.19041	-0.0622714	1.17568	0.273076	0.972189	-0.253266	0.400045	1.36815	-0.638709	-0.649119	1.32778	0.938904	-0.535081	0.235454	0.874992	0.626956	15	-2.68437	3.07094	-4.62118	-0.879505	-0.358728	-0.957097	-5.70124	0.159823	-1.52616	-1.09359	0.296772	-6.63683	0.00302367	-1.62908	-0.773324
16	-0.113444	-0.232898	1.95765	-1.5224	-0.169106	-0.0687569	0.0659392	1.99336	0.40866	1.20855	1.50629	1.08513	0.786421	1.08298	0.134998	0.441106	0.187691	1.30023	0.0895595	1.2531	0.320847	1.62618	-0.221395	0.502554	1.74995	-0.670684	-0.738492	1.54005	0.885815	-0.655248	0.917965	0.627547	0.58992	16	-2.68385	3.97287	-4.43852	-1.51054	-0.607972	-0.976111	-6.53561	-0.279611	-1.84581	-0.988036	0.34164	-6.76646	0.0660523	-1.39359	-0.759699
17	-0.126064	-0.248258	2.12713	-1.60817	-0.121894	-0.0882593	0.104188	2.15123	0.369185	1.42612	1.70889	1.1412	1.15419	1.17427	0.124675	0.396354	0.10863	1.23434	0.17366	1.34596	0.365385	2.54631	-0.128189	0.573899	2.01364	-0.665671	-0.869109	1.80765	0.792509	-0.781726	1.01049	0.456985	0.565495	17	-2.6723	4.73959	-3.97803	-1.5955	-0.929167	-1.09494	-6.91118	-0.738637	-1.58006	-1.09313	0.144461	-6.91057	0.218319	-1.26232	-0.718706
18	-0.105895	-0.0755305	2.11977	-1.90802	-0.0364715	-0.115256	0.126247	1.90363	0.36626	1.68918	2.00324	1.18508	1.32716	1.18443	0.100732	0.355956	0.0377931	1.23311	0.157311	1.46094	0.379353	4.13249	-0.111567	0.603903	2.26181	-0.624115	-0.896899	1.97688	0.771001	-0.889147	1.18398	0.357966	0.546121	18	-2.65913	5.43324	-3.86618	-1.26614	-1.11618	-1.25019	-6.59845	-1.02006	-1.25902	-0.964128	-0.191402	-7.03185	0.263917	-1.09635	-0.765824
19	0.0491609	0.239143	2.0324	-1.77053	0.0465213	-0.139044	0.0958617	1.50273	0.5937	1.77179	2.26296	1.19974	1.21369	1.15345	0.0975147	0.292675	-0.0725807	1.7598	0.16686	1.59539	0.395403	4.76327	-0.075439	0.559753	2.39332	-0.628824	-0.915188	2.07484	0.740772	-0.970368	1.79178	0.357672	0.593178	19	-2.57866	5.73858	-3.96741	-1.43052	-1.27375	-1.38216	-6.34843	-1.07075	-1.01007	-0.823379	-0.414868	-7.07148	0.364373	-1.74009	-0.85948
20	0.162299	0.501635	2.07917	-1.74755	0.117717	-0.254429	0.0166708	1.08964	0.7136	1.77076	2.43541	1.07672	1.00592	1.03392	0.0968842	0.174379	-0.216106	2.8833	0.197788	1.7141	0.403515	5.03855	-0.0113211	0.430828	2.26314	-0.627302	-0.906431	2.21478	0.659588	-1.05265	2.46335	0.352625	0.776435	20	-2.56295	5.74565	-4.05947	-1.43829	-1.55102	-1.48173	-6.53176	-1.23665	-0.797625	-0.704691	-0.531947	-7.06753	0.43898	-2.0184	-0.957486
21	0.136113	0.542578	2.11247	-1.72134	0.235081	-0.359233	-0.0286925	0.724016	0.666232	1.84398	2.52066	0.862977	0.621509	0.591421	0.0920003	0.0303427	-0.446643	2.88828	0.508121	1.72089	0.414725	4.18208	-0.0165365	0.274845	1.98499	-0.596317	-0.912242	2.16927	0.627032	-1.10979	2.92494	0.389757	0.906558	21	-2.56148	5.79385	-4.27373	-1.96045	-1.83177	-1.59679	-6.20864	-1.80518	-0.337336	-1.07636	-0.743224	-7.09429	0.655038	-1.83204	-1.04313
22	0.131239	0.477525	2.0886	-1.94605	0.317475	-0.426427	-0.218221	0.523076	0.655152	1.83469	2.53625	0.642277	0.244346	0.0771124	0.0728469	-0.0720718	-0.689984	2.27349	0.737064	1.79121	0.428764	3.20443	-0.0895869	0.127992	1.59789	-0.576277	-0.879247	2.08049	0.652707	-1.12894	4.5037	0.384217	0.977889	22	-2.47104	5.64617	-4.48421	-2.06396	-2.15094	-1.74911	-5.51304	-2.53481	-0.167545	-1.55251	-0.854089	-7.11834	0.42305	-1.72837	-0.996377
23	0.293289	0.538274	1.9878	-2.0975	0.305482	-0.485845	-0.484742	0.929265	0.510894	1.64218	2.41459	0.500544	-0.175033	-0.367683	0.0429659	-0.119065	-0.827564	1.88911	0.976669	1.88576	0.448197	2.93739	-0.178363	0.0447834	1.10945	-0.600059	-0.852244	2.05319	0.648837	-1.13402	5.807	0.320595	1.12721	23	-2.35347	5.31112	-5.00581	-2.90898	-2.32959	-1.92567	-5.10481	-2.7745	-0.626418	-1.83094	-1.03048	-7.07727	0.360304	-1.64744	-0.860093
24	0.445901	0.699203	1.87287	-2.663	0.312915	-0.550415	-0.518639	1.84096	0.385119	1.39605	2.15466	0.429356	-0.574384	-0.534482	0.020041	-0.0895052	-0.90272	2.41757	0.849755	1.89904	0.456444	2.94135	-0.291352	0.084316	0.772451	-0.645983	-0.739878	2.11081	0.728738	-1.17913	6.7095	0.208073	1.26083	24	-2.4816	4.69106	-5.25339	-3.29151	-2.46613	-2.1156	-5.60489	-2.58522	-1.12357	-1.91616	-1.40561	-6.95631	0.191481	-1.29233	-0.746828
25	0.504662	0.903508	1.7278	-3.03846	0.30278	-0.629956	-0.395626	2.91115	0.455839	1.1681	1.80284	0.555646	-0.731711	-0.539145	0.00122948	-0.0700367	-0.935755	3.72991	0.854998	1.93587	0.446873	2.7669	-0.272005	0.156626	0.849179	-0.682442	-0.646663	2.22595	0.812199	-1.21793	8.57248	0.156094	1.14498	25	-2.5909	4.08769	-5.4671	-3.22578	-2.52829	-2.31322	-5.98362	-1.61646	-0.997088	-2.52313	-1.95574	-6.90004	-0.460355	-0.843232	-0.690154
26	0.608081	1.05584	1.55404	-3.45503	0.178131	-0.700067	-0.247236	4.00999	0.329737	0.932012	1.41572	0.927433	-0.666614	-0.575708	-0.0306045	-0.0781186	-0.932036	4.47578	0.688038	2.09096	0.419121	2.21183	-0.238142	0.190912	1.15774	-0.654787	-0.6101	2.42032	0.878024	-1.23686	8.85882	0.0185553	1.01852	26	-2.7392	3.49164	-5.55773	-3.20829	-2.65217	-2.50469	-5.85887	-0.269395	-0.428287	-2.8432	-2.64996	-7.02667	-1.20968	-0.693908	-0.626261
27	0.736561	1.3526	1.34161	-2.97003	0.153307	-0.751652	-0.0909653	4.89147	0.00702549	0.575393	1.08472	1.29861	-0.721405	-0.863053	-0.0574255	-0.115358	-0.903797	5.29219	0.505203	2.08148	0.37259	2.83983	-0.18937	0.16951	1.66404	-0.610513	-0.578297	2.66553	0.996741	-1.27598	8.13662	-0.110767	0.908529	27	-3.1376	3.26332	-5.16433	-4.10308	-3.16917	-2.60054	-4.82316	0.674003	-0.343501	-2.65585	-3.30716	-7.33829	-1.79503	-0.451107	-0.482097
28	1.01337	1.66155	1.17078	-2.57906	0.325044	-0.773383	-0.00501219	5.57832	0.253195	0.2935	0.83677	1.5886	-0.814268	-1.23772	-0.0937823	-0.192254	-0.881734	6.06388	0.12995	1.96479	0.331973	2.90163	-0.127652	0.133639	2.14374	-0.573443	-0.500176	2.8565	1.0502	-1.32027	7.1338	-0.188001	0.850403	28	-3.70018	3.27146	-4.48844	-4.29684	-3.77366	-2.55788	-3.94288	0.744684	-0.104977	-2.16829	-4.01206	-7.72795	-2.04753	-0.0253128	-0.26092
29	1.46917	1.94782	1.1385	-2.33509	0.493739	-0.744598	0.00797754	6.11066	-0.0349156	0.203591	0.663195	1.82517	-0.940454	-1.39064	-0.113528	-0.309019	-0.847897	6.53262	-0.192095	1.72358	0.289004	2.034	-0.116304	0.125404	2.35351	-0.525628	-0.405932	2.9844	1.043	-1.35823	6.43763	-0.427308	0.81292	29	-4.33259	3.40871	-3.95663	-4.87476	-4.45861	-2.42836	-3.95379	0.512212	0.474057	-2.01312	-5.098	-8.01146	-1.73035	0.0251272	-0.124613
30	1.91209	2.18699	1.18434	-2.65356	0.504749	-0.676132	-0.115607	6.3684	-0.0288417	0.272321	0.543945	2.02349	-1.09112	-1.18943	-0.114849	-0.350266	-0.876592	7.72407	-0.460105	1.62851	0.246461	1.7968	-0.030203	0.143578	2.51594	-0.453293	-0.417203	3.0148	0.97844	-1.31834	5.57454	-0.818419	0.72067	30	-4.98146	3.84636	-3.64434	-5.6529	-4.92472	-2.3937	-3.83536	0.518476	1.11615	-2.48153	-6.2435	-8.20942	-1.25368	0.295613	-0.0455819
31	2.48041	2.47356	1.18113	-3.04265	0.453849	-0.592474	-0.131001	6.97336	0.417192	0.542032	0.484111	2.11878	-0.96126	-0.809563	-0.100698	-0.297224	-0.997314	8.31681	-0.561615	1.68472	0.221052	1.33697	0.124061	0.219664	2.71987	-0.350585	-0.381627	3.08543	0.842075	-1.22405	4.64722	-1.01089	0.695219	31	-5.58132	5.05571	-4.02238	-6.07947	-5.24057	-2.25883	-2.88875	-0.0768693	1.72536	-3.2255	-7.20165	-8.39611	-0.563015	0.701154	-0.0280496
32	3.0677	2.66224	1.18661	-3.16563	0.296785	-0.551733	0.131969	8.03559	1.307	0.69253	0.478537	2.12209	-0.841956	-0.491707	-0.0920624	-0.262652	-1.12807	8.25969	-0.715048	1.60531	0.206045	0.59406	0.173651	0.33796	2.93786	-0.383874	-0.295612	3.19277	0.732427	-1.19322	4.65939	-1.02152	0.76783	32	-6.16985	6.14826	-4.67775	-6.42108	-5.40869	-2.14349	-2.88538	-1.74055	2.4099	-3.7398	-7.92976	-8.51538	-0.186701	1.24723	0.00384221
33	3.49994	2.76845	1.10679	-2.66631	0.169876	-0.516475	0.2691	8.87251	2.31104	0.772543	0.501593	2.04488	-0.730611	-0.170236	-0.0935464	-0.231048	-1.31709	7.77894	-0.752502	1.46051	0.211267	0.0785777	0.195228	0.482991	2.71239	-0.446233	-0.244643	3.25275	0.75078	-1.21545	3.83929	-1.02601	1.02869	33	-6.58643	6.51998	-5.46096	-6.46792	-5.37546	-2.03654	-4.37766	-3.52099	3.1079	-4.08633	-8.91236	-8.66727	0.0194921	2.83984	0.0826589
34	3.8216	2.77204	0.955954	-1.67732	0.0524043	-0.457785	0.0848355	9.20224	2.90696	0.883144	0.570606	1.88916	-0.52589	0.104351	-0.0949918	-0.240343	-1.67937	7.17003	-0.479497	1.34524	0.234828	0.0449815	0.273803	0.666092	1.85045	-0.47577	-0.234231	3.28615	0.699186	-1.22884	2.79434	-0.933368	1.17051	34	-6.81347	6.65207	-6.33499	-6.31839	-5.13412	-2.05973	-4.7532	-4.09911	2.78319	-4.52905	-10.1026	-8.86198	-0.114419	4.48066	0.16245
35	3.99791	2.66281	0.811814	-1.20584	-0.239941	-0.401518	-0.160707	8.94889	3.30815	0.874893	0.679593	1.74105	-0.464122	0.189326	-0.098688	-0.297186	-2.1473	6.55457	-0.590676	1.34828	0.26073	0.44492	0.167805	0.787652	0.380293	-0.453203	-0.282141	3.29518	0.696856	-1.2872	2.47634	-0.703434	1.19582	35	-6.99947	6.97628	-7.51273	-6.11101	-4.78289	-2.20564	-4.08794	-3.89803	2.36312	-4.99925	-11.0863	-9.01394	-0.0751859	5.91229	0.120804
36	4.0228	2.41798	0.659835	-0.302284	-0.589698	-0.383367	-0.407072	8.31642	2.83296	0.934704	0.816523	1.60803	-0.613583	-0.115913	-0.0869875	-0.391542	-2.54351	6.52389	-0.480573	1.49041	0.282213	1.12557	0.0274301	0.841051	-0.706918	-0.462708	-0.415432	3.32904	0.805823	-1.3674	2.99988	-0.241858	1.09189	36	-6.99577	7.45704	-8.34987	-5.59654	-4.72298	-2.29206	-2.87894	-3.22024	2.17596	-5.93018	-12.3655	-8.93903	-0.286749	6.6228	0.0348717
37	3.84222	2.06303	0.58216	0.758952	-0.866681	-0.390706	-0.852958	7.53483	2.14788	0.990782	0.928749	1.41412	-0.747889	-0.54151	-0.0582378	-0.476473	-2.74702	6.08917	-0.266156	1.51044	0.259423	1.47773	0.00790957	0.822349	-1.62805	-0.490455	-0.457418	3.38082	1.01725	-1.4314	3.63773	0.438779	1.346	37	-6.81782	7.80083	-9.29335	-5.63998	-4.91174	-2.37931	-2.04363	-2.34935	2.09107	-6.95301	-13.0793	-8.52782	-0.34364	6.96265	-0.0194459
38	3.60608	1.77498	0.566314	1.79175	-1.26688	-0.423751	-1.27187	6.76026	1.83233	1.23911	0.99388	1.14165	-0.918573	-0.957571	-0.0104295	-0.58387	-2.74402	5.59023	-0.0795356	1.60263	0.238027	1.12866	-0.0240928	0.840584	-2.51515	-0.505356	-0.399015	3.33844	1.15691	-1.46749	4.74186	1.05166	1.86947	38	-6.76823	8.18004	-9.91006	-4.76689	-5.19463	-2.40085	-1.16306	-1.07678	3.00518	-8.30884	-12.8316	-7.87044	-0.179273	7.57832	-0.114707
39	3.32028	1.51679	0.447734	2.86025	-1.56381	-0.400557	-1.68624	6.18835	1.78883	1.40364	1.0498	0.831293	-1.05765	-1.21296	0.0169917	-0.705063	-2.59957	4.4355	0.0245492	1.85327	0.230066	1.14272	0.0160031	0.832525	-2.73174	-0.484694	-0.31213	3.33083	1.21263	-1.49153	5.2104	1.48724	2.18538	39	-6.51423	8.59096	-10.1957	-3.62155	-6.19536	-2.29532	-0.000528944	-0.842217	4.19738	-9.36167	-12.3725	-7.29964	-0.353152	8.14839	-0.292201
40	3.01849	1.25718	0.312717	3.56775	-1.59541	-0.374136	-1.94314	5.73377	1.65094	1.43429	1.09928	0.598629	-1.09732	-1.42289	0.0184575	-0.836754	-2.45578	2.60774	0.0109655	1.94387	0.222471	0.456746	-0.0450382	0.820232	-2.78169	-0.463276	-0.233838	3.30418	1.18052	-1.5153	5.79799	1.70209	2.21374	40	-6.44543	8.22886	-10.7539	-2.25998	-7.27448	-2.26797	1.00067	-0.201421	5.38719	-9.48278	-12.4952	-6.91102	-0.126155	8.2466	-0.520974
41	2.7813	1.18177	0.228577	4.19154	-1.50688	-0.363758	-2.02058	5.37632	1.13873	1.34097	1.12181	0.45791	-1.50193	-1.68111	-0.017288	-0.973944	-2.30205	1.82726	-0.0446095	2.01652	0.232813	-0.546	-0.18968	0.837828	-2.54848	-0.506011	-0.172757	3.32563	1.27799	-1.68394	5.13473	1.59208	2.14346	41	-6.24281	7.20451	-11.9002	-0.565347	-8.30924	-2.32187	1.74767	0.362331	6.33053	-8.73165	-12.7398	-6.70479	0.373682	7.82464	-0.71373
42	2.63261	1.05218	0.18271	5.08424	-1.74281	-0.380495	-2.11156	4.88947	0.719885	1.30247	1.07148	0.284877	-2.21251	-1.73873	-0.0629279	-1.05161	-2.18134	2.30396	-0.184202	2.1302	0.229278	-1.43445	-0.349057	0.813784	-2.67187	-0.633291	-0.140403	3.27333	1.35587	-1.96158	4.72055	1.38985	1.78397	42	-5.9621	6.05281	-14.0339	1.25598	-8.71387	-2.33363	1.71409	0.0805778	6.59266	-7.94991	-12.9828	-6.61933	0.582732	7.26863	-0.89007
43	2.75242	0.858822	0.157163	5.81789	-2.34134	-0.431789	-2.2649	4.01866	0.50958	1.11616	0.954316	0.109738	-2.44349	-1.8289	-0.0602759	-1.03867	-2.17889	3.07303	-0.0600571	2.26352	0.200368	-2.01645	-0.512616	0.716076	-3.26194	-0.798815	-0.067989	3.16167	1.4086	-2.26731	4.15587	1.15627	1.32201	43	-5.81138	5.17479	-14.7162	3.39618	-9.04621	-2.26639	2.51761	-0.599588	6.42626	-7.52497	-12.9806	-6.58231	0.438742	6.30163	-0.9984
44	3.13309	0.642623	0.213832	6.48922	-2.9383	-0.490828	-2.46616	3.0114	0.503801	0.946549	0.750403	0.0593697	-2.14709	-1.66956	-0.00116933	-1.0708	-2.18704	3.01734	-0.145849	2.54124	0.156177	-2.29213	-0.553806	0.58006	-3.67637	-0.913352	-0.00180454	3.12607	1.38049	-2.51157	4.29753	1.00636	1.11144	44	-5.61727	4.37947	-14.9512	5.8044	-9.6406	-2.20026	2.65446	-1.10658	5.95851	-7.56135	-13.3335	-6.52279	0.52212	5.27153	-1.13292
45	3.61127	0.417046	0.222525	6.8753	-3.6198	-0.524219	-2.73421	2.05949	0.765381	1.06095	0.521208	0.0796246	-1.51557	-1.54182	0.0792706	-1.10568	-2.04373	3.29192	-0.201136	2.99979	0.144376	-2.2003	-0.64323	0.462018	-4.26762	-1.0411	0.0314123	3.16398	1.10495	-2.68703	4.87824	0.473663	1.34251	45	-5.41591	3.66092	-14.6197	8.20939	-10.733	-2.18349	2.22871	-1.56625	5.50591	-6.87842	-13.8735	-6.48442	0.38799	4.38515	-1.2128
46	4.24422	0.197888	0.192991	6.94794	-4.46337	-0.517961	-3.06117	1.41409	1.04	1.21308	0.329086	0.155185	-0.59635	-1.29606	0.15815	-1.16667	-1.86613	3.85384	-0.287313	3.52247	0.1597	-1.5734	-0.752776	0.390033	-4.64093	-1.17305	0.0711562	3.32557	0.757968	-2.7828	5.41492	-0.320703	1.39645	46	-5.27462	3.24489	-13.618	10.138	-13.1848	-2.08179	1.77659	-1.54501	5.11035	-5.84402	-13.6682	-6.43151	-0.136371	4.03927	-1.13712
47	4.79502	-0.0540477	0.282588	6.92346	-5.30007	-0.534936	-3.16846	1.24794	1.49856	1.56208	0.152461	0.30022	0.356747	-1.0356	0.19881	-1.21578	-1.68302	4.58005	-0.379519	3.98953	0.179283	-1.23761	-0.600571	0.308512	-4.38484	-1.19149	0.0928621	3.681	0.525442	-2.87429	5.57513	-1.18302	1.50811	47	-5.34718	3.45758	-12.0217	11.5865	-16.4952	-1.88736	1.63087	-0.770575	4.48743	-5.29624	-13.1858	-6.41932	-0.675896	3.79434	-1.15985
48	5.23448	-0.233706	0.503003	6.64732	-6.24824	-0.536982	-3.08266	1.34085	1.68081	1.53927	-0.0772552	0.512293	1.53006	-0.732936	0.204497	-1.21807	-1.50955	4.45279	-0.21273	4.36467	0.188898	1.22407	-0.392142	0.212069	-4.42389	-1.19958	-0.0130556	4.00074	0.459467	-2.98249	5.84919	-1.77924	1.58817	48	-5.74688	3.79092	-10.3929	12.3177	-18.2162	-1.65838	0.908468	-0.0105809	3.93651	-4.33627	-13.0342	-6.41444	-0.701087	3.6165	-1.25399
49	5.45729	-0.377603	0.710241	6.42898	-7.12892	-0.656963	-2.97982	1.47319	1.41051	1.62254	-0.312134	0.76624	2.49478	-0.263584	0.199489	-1.17673	-1.46851	4.63816	-0.0225501	4.35304	0.178364	3.29642	-0.519077	0.17804	-4.67414	-1.21327	0.0236876	4.18391	0.471939	-3.14002	6.16668	-2.23127	1.59646	49	-6.37612	4.30471	-8.83666	12.6588	-18.5549	-1.43319	0.18487	1.07031	1.92619	-2.93891	-12.5437	-6.18954	-0.0456909	4.42397	-1.34776
50	5.8336	-0.377953	0.791838	6.27514	-7.74868	-1.04088	-3.18843	1.48933	1.2982	1.74834	-0.389795	1.04628	3.26616	0.224779	0.182342	-1.00241	-1.53391	5.25495	-0.110783	4.30008	0.172518	4.13427	-0.717403	0.201153	-4.72434	-1.20489	0.00971395	4.40559	0.556187	-3.22361	6.6983	-2.53506	1.5739	50	-7.25749	4.54126	-7.45322	12.0211	-17.8538	-1.25633	-0.237013	2.55777	0.151208	-1.44698	-12.0016	-5.85348	0.840192	4.95827	-1.27969
51	6.12901	-0.323809	0.832405	5.90492	-8.06617	-1.60879	-3.4254	1.47352	0.963429	1.62945	-0.218214	1.22709	3.15005	0.798914	0.166179	-0.644312	-1.73098	6.00055	0.11896	3.8166	0.153469	4.39575	-0.889554	0.210611	-4.26853	-1.08626	0.0990418	4.65485	0.660921	-3.27603	6.35189	-2.8752	1.3747	51	-8.25308	5.02288	-6.36815	10.9716	-16.6183	-1.28708	-0.737442	3.76817	-0.152931	0.141261	-11.3614	-5.50098	3.28744	5.3718	-1.05079
52	6.12	-0.328225	0.843067	5.01979	-8.34674	-2.65297	-3.61004	1.45347	0.626418	1.27208	0.135737	1.15707	2.78246	1.24959	0.151837	-0.308527	-1.98481	6.31559	0.386813	3.61727	0.126701	3.73434	-0.820825	0.243952	-3.89482	-0.870053	0.150239	4.86544	0.686904	-3.39011	6.83514	-3.70103	0.967038	52	-9.28457	5.59222	-6.12579	8.82517	-14.9205	-1.38948	-1.06897	4.51834	0.755352	2.03113	-10.5308	-5.00631	5.85762	5.95167	-0.719051
53	5.96916	-0.369273	0.819062	4.26299	-8.28549	-4.62481	-3.75844	1.26153	0.0861752	1.0448	0.478473	1.0143	2.48348	1.70296	0.138866	-0.0508482	-2.26242	5.81389	0.378663	3.76456	0.123208	2.31043	-0.523508	0.349395	-3.43694	-0.730352	0.286206	5.09426	0.802532	-3.42441	6.0717	-4.28851	0.486971	53	-10.331	6.0785	-6.80369	5.51138	-11.9455	-1.43173	-0.535136	5.19934	1.78501	2.34354	-9.32583	-4.24671	8.35924	7.74122	-0.325092
54	5.72367	-0.336531	0.907294	3.56264	-7.74255	-6.97535	-4.00324	0.981167	0.181783	0.978468	0.678641	1.01051	2.43228	2.22225	0.130165	0.0783219	-2.47534	5.49457	0.250136	3.84773	0.126716	1.9913	-0.443225	0.627854	-2.64451	-0.644394	0.397048	5.2727	0.927543	-3.43773	4.47661	-4.09469	0.129443	54	-10.9659	7.04876	-7.18722	2.40111	-3.93591	-1.49512	-0.16848	5.68345	2.92881	1.86001	-8.24957	-3.42676	10.56	7.64666	-0.0591708
55	5.51658	-0.288897	1.12935	2.67435	-7.56749	-9.02724	-4.23057	0.457553	0.263143	0.680268	0.662912	1.12668	2.45534	2.84442	0.129039	0.0673005	-2.54004	5.06964	0.0211703	3.95448	0.110761	2.14921	-0.433065	1.05355	-1.77763	-0.520617	0.497011	5.38511	1.0198	-3.57616	3.81349	-4.21561	-0.276137	55	-12.4292	8.405	-6.68331	-0.26422	3.02789	-1.19581	0.154309	5.78421	3.53066	2.07043	-7.10276	-2.88952	12.8185	6.68925	0.0930839
56	5.55818	-0.291454	1.32018	1.85729	-7.48101	-10.341	-4.24123	-0.141534	0.913617	0.471669	0.423798	1.26627	2.68864	3.27938	0.106191	-0.0665893	-2.50663	5.10474	-0.316993	4.01705	0.131242	2.65925	-0.0786089	1.52043	-1.23447	-0.315728	0.690436	5.30576	1.28598	-3.73005	4.50958	-4.36893	-0.715201	56	-13.8596	8.89439	-6.40837	-3.12572	7.73729	-0.891904	0.201776	5.96662	2.82139	2.77009	-6.26623	-2.52781	14.9737	6.24876	0.148494
57	5.53725	-0.283287	1.49508	1.33026	-8.22196	-11.0019	-4.14048	-0.767268	1.60625	0.433552	0.236763	1.29862	2.89349	3.70155	0.0793816	-0.264188	-2.47581	4.52636	-0.303536	3.93243	0.150777	2.85502	0.0780507	2.03941	-1.01415	-0.265556	0.749764	5.04086	1.60118	-3.86375	5.3984	-4.34576	-1.08449	57	-14.3349	9.54854	-6.42294	-5.39973	11.1477	-0.49478	-0.0534616	5.86337	2.57292	1.88873	-5.56521	-1.86432	16.0966	5.71662	0.0254646
58	5.46661	-0.176054	1.70735	0.721707	-9.77784	-11.0814	-3.91884	-1.4955	1.69523	0.319217	0.181163	1.12739	3.096	4.17484	0.049045	-0.552284	-2.64581	3.99686	0.17947	3.97844	0.123199	3.11248	0.210011	2.54489	-0.647437	-0.272415	0.799928	4.89037	1.67733	-3.84135	5.86693	-3.94182	-1.43992	58	-13.9316	10.2745	-5.58494	-7.39482	12.6859	-0.226256	-0.58453	5.86292	2.43728	0.781119	-4.45492	-1.13095	15.8799	4.60552	-0.0797467
59	5.19501	-0.0450829	1.94686	-0.537778	-10.937	-10.7124	-3.81014	-2.14283	1.58563	0.343937	0.201771	0.767264	3.12735	4.52578	0.0230489	-0.818268	-2.82311	4.23032	0.873628	3.85649	0.0838027	3.40418	0.375589	2.95828	-0.340213	-0.309306	0.74504	4.67677	1.93558	-3.69602	5.28117	-3.39102	-1.75021	59	-13.3108	10.7953	-4.75457	-7.97542	13.1119	0.146633	-1.0881	5.80853	2.42844	-0.107221	-3.15029	-0.48869	14.8681	2.93387	-0.256883
60	5.00444	0.112893	1.99459	-1.66253	-12.0993	-10.0245	-3.77956	-2.85228	1.62747	0.451409	0.173349	0.460237	3.0867	4.51951	0.00848036	-1.11326	-2.94256	4.53078	1.44903	4.12674	0.0330867	3.67488	0.0886727	3.28167	-0.4001	-0.378365	0.851434	4.28458	2.31838	-3.49593	3.49718	-3.13429	-2.23134	60	-12.5771	11.678	-4.38147	-9.24689	12.5423	0.37409	-1.65932	5.5253	1.65261	-0.582543	-2.00678	-0.0302912	13.3817	0.925746	-0.44232
61	4.80351	0.276889	1.93735	-2.39533	-13.2035	-9.14808	-3.78446	-3.54912	1.70156	0.54398	0.125003	0.319589	3.05045	4.32961	-0.0169541	-1.4316	-3.02433	4.20747	1.63813	4.48212	-0.0234366	3.36595	-0.220154	3.5697	-0.763717	-0.546096	0.979583	3.92028	2.63768	-3.24838	2.91753	-3.0928	-2.70112	61	-11.3388	12.092	-4.36097	-10.6472	10.9858	0.612686	-1.71109	5.15458	0.378002	-0.202274	-0.699558	0.532798	11.743	-1.30129	-0.611031
62	4.56934	0.454287	1.87028	-3.21741	-13.5298	-8.13978	-3.60988	-4.10049	1.46553	0.46784	0.102195	0.253909	3.3033	4.17189	-0.0616511	-1.56228	-3.19842	3.05838	1.47293	4.90218	-0.123448	2.69681	-0.654706	3.81322	-1.20059	-0.75389	0.986887	3.6747	2.74612	-2.9936	3.60015	-3.25628	-2.9376	62	-10.1596	12.7144	-3.92834	-12.7183	8.37057	0.722466	-1.62866	4.7858	-0.676859	0.109243	0.914998	1.05843	10.004	-2.20006	-0.822
63	4.50003	0.575254	1.79741	-4.26665	-13.251	-7.06327	-3.43796	-4.53278	1.55958	0.432275	0.237432	0.307914	3.57726	4.04921	-0.103375	-1.62237	-3.493	2.48755	1.53278	5.02207	-0.188633	1.63246	-1.18672	3.83717	-1.50754	-0.933774	0.942869	3.48744	2.82484	-2.87869	3.97802	-3.997	-3.13534	63	-9.08196	13.1583	-3.46393	-15.4763	4.76533	0.319408	-1.90137	4.45032	-1.39521	0.357624	2.61292	1.25345	8.03044	-3.42503	-0.837114
64	4.51809	0.591636	1.71757	-5.16571	-12.306	-6.03848	-3.25797	-4.63708	1.37081	0.624451	0.454016	0.362212	3.69683	3.94466	-0.139049	-1.64256	-3.77845	1.75174	1.37161	4.63833	-0.210969	0.806168	-1.82619	3.7641	-1.83426	-1.03457	0.906202	3.36098	2.87122	-2.84057	4.75212	-4.37764	-3.1272	64	-7.83274	11.7865	-3.25389	-17.4001	0.518706	-0.220786	-2.26861	4.11306	-2.33749	0.912548	4.40386	1.19132	5.82668	-6.43098	-0.603646
65	4.65925	0.542706	1.64959	-5.2849	-10.6718	-5.08146	-2.92636	-4.33261	0.364006	0.922784	0.585017	0.400122	3.93439	3.77898	-0.162745	-1.43859	-3.99542	1.06176	1.51631	4.2104	-0.219766	0.414363	-2.09967	3.77315	-1.88521	-1.07715	0.891894	3.42129	2.97232	-2.83699	4.25714	-5.13879	-2.84055	65	-6.21675	10.4496	-2.82863	-19.2152	-3.9141	-0.952506	-2.71497	3.65508	-2.90658	1.74714	6.20965	1.11663	3.2146	-9.29428	-0.41081
66	4.84269	0.567938	1.64213	-5.25532	-8.74608	-4.21477	-2.53266	-3.77989	-0.278698	1.05132	0.545243	0.345948	4.25075	3.40349	-0.166403	-1.01878	-4.19852	1.28769	1.83912	4.14046	-0.209443	0.78065	-2.06823	3.94401	-1.71809	-1.12364	0.77116	3.53519	2.9238	-2.95574	3.27878	-7.00535	-2.78652	66	-4.79257	9.58435	-2.90021	-20.6373	-6.75675	-1.49016	-2.83825	3.24824	-3.7792	2.21546	7.53135	1.0302	0.976516	-10.6589	-0.439141
67	4.96274	0.583904	1.79852	-5.15654	-7.24398	-3.47296	-2.26411	-3.1894	-0.0863252	1.15168	0.454974	0.132531	4.47388	2.97671	-0.164433	-0.652312	-4.46501	1.93354	1.98519	4.58804	-0.14245	1.48458	-1.50783	4.12475	-1.46675	-1.12291	0.511335	3.50603	2.79801	-3.06831	3.36484	-8.48493	-2.73296	67	-3.65228	8.93676	-3.15386	-19.6902	-7.79305	-1.57104	-2.86384	3.14826	-4.3427	2.43774	8.48257	0.985462	-1.94358	-12.4292	-0.484376
68	5.11628	0.562287	1.93505	-5.05468	-6.38148	-2.82976	-1.97407	-2.64944	0.632103	1.23167	0.425492	-0.292524	4.54457	2.57125	-0.144228	-0.348659	-4.80766	2.85256	1.85231	4.95831	-0.0595106	2.35027	-0.89576	4.36436	-0.808154	-1.0295	0.361187	3.40697	2.58718	-3.19187	4.03045	-9.0699	-2.6511	68	-2.98569	8.83048	-3.51208	-18.3347	-7.49239	-1.5025	-2.68715	3.46152	-5.13377	2.58644	9.22858	0.964579	-5.02938	-13.7231	-0.304253
69	5.24891	0.541857	2.27536	-4.90682	-5.75355	-2.20728	-1.59816	-2.18973	0.579006	1.10462	0.301341	-0.765639	4.14721	2.12383	-0.145179	-0.197069	-5.17433	3.76765	2.40535	5.21238	0.00871654	2.53154	-0.446249	4.6016	-0.00295125	-0.988802	0.349322	3.42256	2.18197	-3.21878	5.46652	-9.45518	-2.32387	69	-2.21267	8.30618	-3.89402	-17.2519	-6.5746	-1.48663	-2.49404	4.18953	-5.67359	3.21654	9.64903	0.706116	-7.32935	-14.4805	0.27686
70	5.10955	0.58891	2.54683	-3.95311	-4.88524	-1.63731	-1.06526	-1.287	0.33681	1.02591	-0.018155	-1.02032	3.47856	1.63553	-0.163327	-0.0863938	-5.48939	3.47998	2.78413	5.39078	0.0580447	2.6066	-0.0509868	4.82787	0.94172	-0.913546	0.368232	3.57734	1.97315	-3.31195	5.8189	-10.8711	-1.85125	70	-1.55474	7.06	-4.45733	-16.0684	-5.41023	-1.48879	-2.01363	4.97621	-5.57691	2.88916	10.2269	0.308546	-9.16398	-14.0828	0.891172
71	4.84106	0.679992	2.72032	-3.26773	-4.45833	-1.08848	-0.207667	0.253492	0.324396	0.933926	-0.461975	-0.946308	2.79167	1.18644	-0.154428	-0.0390273	-5.79502	2.38235	2.91018	5.49925	0.0765548	2.61296	-0.029404	4.99346	1.9474	-0.734379	0.503055	3.65709	1.94062	-3.38224	5.01314	-12.562	-1.33556	71	-0.813521	4.98915	-5.37159	-15.7336	-4.70256	-1.97747	-1.5161	5.55833	-5.72107	1.86507	10.8183	-0.050983	-10.4457	-11.4434	1.19451
72	4.57423	0.704412	2.87442	-2.67429	-3.69188	-0.638856	0.659976	2.02675	-0.0948372	1.16022	-0.924267	-0.579866	2.0824	0.786164	-0.140043	-0.227348	-5.87788	1.40966	2.68507	5.06538	0.0566222	1.99999	0.336398	5.14943	2.78338	-0.549758	0.561799	3.6314	1.91119	-3.41126	4.09179	-14.0473	-0.520492	72	-0.788803	3.13312	-6.61339	-14.8335	-3.57728	-2.59457	-1.37714	5.78238	-6.15046	0.50621	11.5707	-0.206248	-11.3279	-6.94667	1.41112
73	4.34767	0.68608	2.93821	-2.8939	-2.88049	-0.216769	1.35281	3.81268	-0.752957	1.44405	-1.26483	-0.0604734	1.11153	0.337006	-0.147361	-0.553493	-5.9304	0.781219	2.37038	4.73951	0.0385581	2.04414	1.08356	5.23256	3.11394	-0.514362	0.581302	3.64781	1.95238	-3.49441	4.53547	-14.8443	0.401679	73	-0.882893	1.6016	-7.71172	-15.0214	-1.3214	-3.06848	-1.17407	6.13576	-6.03505	-1.39209	12.4127	-0.360217	-12.1425	-2.25055	1.71918
74	4.36417	0.689629	3.03433	-3.39167	-1.63049	0.129965	2.08629	5.25862	-1.16621	1.7887	-1.58143	0.447331	0.0693746	-0.137389	-0.167274	-0.932691	-5.80749	1.37468	2.55177	4.72566	-0.018415	1.65025	1.91803	5.16739	3.38259	-0.558325	0.489706	3.57462	2.15943	-3.64682	5.61028	-14.2911	1.36975	74	-0.308027	0.540754	-8.35722	-15.5355	-0.234242	-3.7576	-0.833467	6.4675	-6.42216	-2.85798	13.4156	-0.452869	-12.2106	1.68766	1.9522
75	4.45403	0.740989	3.25244	-4.07865	-0.418851	0.364068	2.53813	6.06733	-1.04612	2.17767	-1.92433	1.07732	-0.977373	-0.549434	-0.175705	-1.36498	-5.49465	2.51358	2.49055	5.23186	-0.105383	1.68948	2.40205	5.04288	3.65617	-0.550769	0.543963	3.55491	2.33699	-3.62036	6.42893	-14.0345	1.95521	75	-0.65175	-0.220053	-8.37989	-14.7488	1.89414	-3.93779	-0.562235	6.94143	-7.43985	-2.9538	14.4593	-0.376645	-12.6046	3.52365	1.93523
76	4.34481	0.782139	3.53434	-4.72057	0.421797	0.458092	2.95392	6.30978	-0.759799	2.68476	-2.12932	1.74095	-1.93661	-0.83043	-0.16247	-1.72365	-5.13401	3.28686	2.23916	5.58913	-0.225045	1.88708	2.92585	4.95301	3.28929	-0.568195	0.648045	3.2716	2.35688	-3.66313	7.41243	-13.4629	2.05946	76	-0.799084	-0.810261	-8.5049	-14.1418	4.10792	-3.53518	-0.239568	6.93744	-8.49788	-3.01441	15.4153	-0.25987	-13.363	3.62255	1.82706
77	4.14553	0.850096	3.87175	-4.84864	0.733488	0.508638	3.35507	6.24352	-0.709461	2.85047	-2.12034	2.33016	-2.50052	-1.16036	-0.169401	-1.81588	-4.99101	2.92301	2.84974	5.79793	-0.361941	1.23989	3.09492	4.85005	2.45842	-0.499211	0.499758	2.98091	2.21671	-3.74511	8.19028	-13.3359	1.60231	77	-0.646798	-0.935778	-9.32977	-13.0832	7.51064	-3.39584	0.0272033	6.92113	-8.47154	-3.62747	16.4499	-0.179138	-14.2995	4.13309	1.74165
78	4.07163	0.83665	4.0441	-4.8214	1.54323	0.557351	3.67115	5.93019	-1.20923	2.73636	-1.89243	2.77773	-2.96401	-1.52469	-0.192057	-1.78554	-5.21508	2.94207	2.74334	6.59271	-0.487671	0.430468	3.2713	4.85591	1.40811	-0.335259	0.295133	2.72572	1.96339	-3.59285	9.19876	-14.1316	0.958993	78	-0.234548	-0.525684	-10.0161	-11.0755	10.8894	-3.90888	0.29133	6.74434	-7.40782	-3.61709	16.9961	-0.184695	-14.3232	5.99027	1.80776
79	4.05686	0.737195	4.05091	-5.09315	1.99945	0.621152	4.02817	5.53739	-1.41921	2.51868	-1.43194	3.08423	-3.55321	-1.91692	-0.190118	-1.82366	-5.50863	2.47636	3.05539	7.52136	-0.586804	-0.910245	3.44913	4.94743	-0.427327	-0.144312	0.219367	2.61851	1.88516	-3.39846	9.3762	-14.3265	0.159438	79	-0.396603	-0.152061	-11.2337	-9.05307	15.2866	-4.40191	0.312594	6.28525	-6.5132	-2.71108	17.2797	-0.335823	-13.8185	7.2454	1.8525
80	3.88398	0.616833	3.91995	-4.95232	2.20549	0.648022	4.17633	5.33222	-1.27942	2.25979	-0.835343	3.31232	-4.23976	-2.27374	-0.190599	-1.82399	-5.84723	1.55984	3.23003	7.72557	-0.645937	-1.44091	3.58415	5.10687	-1.93503	-0.0588581	0.280137	2.82044	1.64135	-3.14812	9.47636	-14.5599	-0.549776	80	-0.743174	-0.253701	-12.1377	-7.04545	19.2098	-4.33645	0.292844	6.10724	-6.22283	-0.825067	17.4604	-0.440412	-13.9049	5.27329	1.83169
81	3.72056	0.504987	3.75894	-5.09587	2.59932	0.633604	4.07524	5.04417	-1.24125	2.17931	-0.205266	3.57295	-4.62178	-2.76747	-0.227269	-1.57045	-6.16175	1.02626	2.95641	7.5845	-0.682327	-2.7485	2.94967	5.16118	-3.12703	-0.0460782	0.202856	3.49095	1.5936	-3.01016	7.25901	-15.2639	-1.155	81	-2.25474	-0.211952	-12.9418	-4.57975	23.0747	-4.45185	0.269007	5.62765	-5.74839	1.07848	17.3901	-0.543842	-14.1529	1.28796	1.96651
82	3.53999	0.45985	3.53362	-5.45193	2.65245	0.564367	3.86909	4.20091	-1.45464	2.12444	0.271488	3.85928	-4.81518	-3.31452	-0.287434	-1.36907	-6.36847	0.17835	2.88362	6.89347	-0.683279	-4.17477	2.50993	5.01557	-3.78759	0.0388583	0.250033	4.06706	1.87433	-2.88316	2.43229	-15.9576	-1.45178	82	-3.80484	-0.682625	-13.6115	-1.52221	26.9227	-4.7419	0.021778	4.58312	-5.30266	2.42303	17.1376	-0.594826	-14.0404	-1.98628	2.20417
83	3.56019	0.487567	3.30019	-6.6319	3.07377	0.470799	3.7335	3.05626	-1.86613	2.08978	0.691473	4.04283	-5.01556	-3.60751	-0.347723	-1.09828	-6.54159	-0.304693	2.53646	6.40101	-0.725766	-4.2718	2.76995	4.76914	-3.98048	0.110535	0.501861	4.23201	1.90239	-2.68671	-0.960158	-17.8416	-1.54801	83	-5.40014	-1.66018	-14.1833	-0.595118	30.3834	-4.58047	-0.283702	3.59318	-6.08755	3.3344	16.8054	-0.770082	-14.9571	-5.03907	2.41453
84	3.58647	0.566596	3.10698	-7.4212	4.23306	0.335422	3.637	1.97894	-2.0442	1.92347	1.08681	4.20454	-5.4206	-3.40828	-0.36789	-0.710868	-6.68677	-0.505446	2.37692	6.23455	-0.731472	-3.13339	2.72507	4.60351	-3.67998	0.227674	0.512721	4.14686	1.78939	-2.41158	-1.59867	-20.1039	-1.442	84	-7.3492	-3.68546	-14.5787	0.501238	31.7544	-4.58777	-0.646162	3.07617	-6.36418	4.23049	16.2408	-1.05888	-15.2397	-8.30548	2.4729
85	3.42423	0.75824	3.00885	-8.17269	5.40941	0.278596	3.62092	1.10927	-2.33158	1.8267	1.34697	4.19843	-5.79714	-2.91466	-0.422743	-0.556384	-6.86396	-0.894694	1.73972	5.98613	-0.771378	-1.57482	2.19633	4.55871	-3.11168	0.170447	0.407995	4.07634	1.66411	-2.35286	-2.04283	-21.4468	-0.914357	85	-9.26413	-5.7974	-14.7056	2.53858	29.909	-4.74813	-1.0907	2.59809	-6.56356	5.05162	15.954	-1.45574	-15.7532	-12.0852	2.45713
86	3.47083	0.926045	3.00573	-8.4643	5.98429	0.283542	3.6131	0.537915	-3.02839	1.99797	1.67476	3.85693	-5.83824	-2.71968	-0.50481	-0.590179	-7.21413	-1.0171	1.29398	5.33686	-0.799462	-1.11854	2.68637	4.66058	-2.91989	0.131974	0.460357	3.9575	1.43883	-2.38315	-4.21752	-21.6842	-0.319895	86	-10.3371	-6.94028	-14.9479	3.95994	27.3807	-4.39886	-1.25038	2.57928	-6.85815	4.91359	15.5747	-1.91245	-15.0446	-15.4789	2.48175
87	3.63888	1.14031	3.01677	-8.37219	6.05101	0.278027	3.64158	0.0170937	-3.12612	2.13638	1.97202	3.46848	-6.07256	-2.76887	-0.600166	-0.54049	-7.69858	-0.813774	1.46339	4.74587	-0.806629	-1.98447	3.43113	4.66883	-3.10227	0.0636489	0.718099	3.48906	1.15017	-2.3632	-6.14613	-22.7628	0.118214	87	-12.2724	-6.51375	-15.2654	4.30506	26.8078	-4.3924	-1.09376	2.99987	-7.41321	4.02809	15.0838	-2.36251	-13.3967	-18.5687	2.44356
88	3.9128	1.3773	2.97954	-7.88484	5.72254	0.127325	3.64565	-0.546933	-2.89641	2.14696	1.99435	3.11739	-6.43125	-3.05729	-0.663084	-0.326655	-7.99274	-0.821727	1.9807	4.48656	-0.824387	-3.2334	3.71319	4.63487	-2.50874	0.058917	0.712119	2.74358	0.733886	-2.19209	-7.30293	-23.7404	0.474598	88	-14.2482	-6.54029	-14.9205	4.3927	27.3472	-4.80208	-1.06854	3.11762	-7.36648	2.80463	15.0988	-2.74334	-11.7446	-21.4764	2.37626
89	4.11831	1.50274	2.86919	-6.81853	5.25634	0.0205952	3.64267	-1.01477	-2.50267	2.4322	1.78553	2.80333	-6.59702	-3.76008	-0.662242	-0.0553923	-7.95969	-0.625169	1.98615	4.34546	-0.822782	-4.26964	4.02721	4.58538	-1.69669	0.0619202	0.63994	2.27041	0.495693	-1.8823	-6.52097	-21.9053	0.809942	89	-15.5783	-7.26297	-14.0757	5.06448	28.9422	-4.7812	-1.124	3.33036	-7.06162	2.01385	15.2858	-3.08605	-9.38626	-24.3186	2.44107
90	4.09556	1.55378	2.81132	-6.18354	4.78119	-0.0524469	3.60472	-1.36143	-2.35319	2.55547	1.51648	2.53414	-6.39252	-4.79917	-0.662886	0.213808	-7.72996	0.340134	2.09058	4.42	-0.835383	-4.33087	4.93073	4.55867	-1.55495	0.0941146	0.728745	2.20824	0.575822	-1.76126	-5.09146	-18.7503	0.835505	90	-15.253	-8.52767	-12.8292	5.40817	27.8087	-4.42836	-1.1695	3.89363	-6.41248	1.35099	15.3182	-3.45511	-7.11954	-26.6315	2.67972
91	3.91924	1.54249	2.77388	-5.38062	5.04669	-0.147272	3.37434	-1.93045	-2.15208	2.26113	1.39269	2.28553	-6.46733	-5.98797	-0.655147	0.351009	-7.21183	1.77581	2.10723	4.26131	-0.824233	-3.82319	6.45668	4.59545	-1.84626	0.0435048	0.70332	2.37082	1.11242	-1.8147	-4.4151	-16.7905	0.585125	91	-14.7479	-9.84471	-11.0702	5.98712	25.4973	-4.43334	-1.13575	4.69706	-5.43142	0.636774	15.5827	-3.8815	-4.7849	-26.8378	3.08202
92	3.70404	1.5491	2.64802	-4.95178	5.59954	-0.178639	3.12468	-2.34994	-1.90887	1.998	1.417	2.06199	-6.41726	-6.99717	-0.649513	0.295089	-6.44234	2.69299	2.24355	5.18283	-0.808497	-3.36846	7.84407	4.81364	-2.32945	0.250207	0.460562	3.12778	1.74372	-1.83118	-4.70275	-16.4485	0.0392127	92	-13.5243	-11.1389	-10.1078	6.74063	23.5885	-4.75441	-0.91513	5.45746	-4.55776	0.349546	15.6592	-4.27568	-2.14683	-27.0139	3.43361
93	3.70162	1.57085	2.62423	-4.55629	6.4184	-0.219396	3.01341	-2.62922	-2.35305	2.07768	1.50048	1.76465	-6.27633	-7.98427	-0.754571	0.213404	-5.69746	3.12573	2.26347	6.39628	-0.906127	-3.66623	8.23152	5.13984	-2.97792	0.419805	0.489016	3.97225	1.903	-1.94408	-5.27074	-17.2356	-0.883852	93	-12.5041	-11.5072	-8.79093	6.28755	21.5682	-5.02032	-0.537205	6.05065	-4.20734	-0.18093	15.6055	-4.68039	-0.510754	-26.9978	3.66939
94	3.86672	1.51629	2.75137	-4.69779	6.72695	-0.275537	2.9868	-3.00152	-2.44365	2.02933	1.59929	1.48203	-5.9723	-8.80405	-0.87912	0.17858	-5.17544	3.18651	2.16349	7.58212	-0.960003	-3.83214	7.69489	5.25032	-3.90708	0.670998	0.376788	4.82671	2.2951	-1.91277	-4.39167	-17.6863	-2.03322	94	-12.0144	-10.9343	-6.78868	6.64212	20.142	-5.38701	-0.344372	6.82875	-3.54722	-1.01917	15.7344	-5.12294	0.869756	-26.2962	3.8869
95	4.05661	1.55005	2.78258	-4.39872	6.40699	-0.280792	3.03481	-3.309	-2.66377	1.77811	1.62495	1.32478	-5.83669	-9.30591	-0.936496	0.131766	-4.62862	2.92589	2.48143	9.21401	-0.955491	-4.02232	7.23551	5.10867	-4.59017	0.968039	0.159783	5.83794	2.55113	-1.81943	-3.51986	-17.8913	-2.77391	95	-11.1239	-10.1434	-4.84076	7.52669	20.6894	-5.77365	-0.32219	7.37383	-2.62288	-1.90237	15.9139	-5.55509	2.5185	-24.7856	4.02647
96	4.20478	1.53739	2.65617	-3.75113	6.01746	-0.362215	3.22267	-3.3579	-2.27365	1.72949	1.44837	1.1684	-5.48921	-10.235	-0.969962	0.0285115	-3.96206	3.31829	3.17936	11.1439	-0.911429	-4.03355	7.00279	4.82867	-5.00285	1.43544	0.0292473	7.49176	3.25125	-2.0845	-3.89447	-17.9632	-3.34474	96	-11.3699	-9.92184	-2.69543	8.59	21.8023	-5.87357	-0.13866	7.58309	-1.99362	-1.42689	15.9376	-5.87387	2.89762	-24.2885	4.22484
97	4.27226	1.50276	2.57972	-2.94104	4.44039	-0.610364	3.2047	-3.3396	-1.89278	1.67928	1.29212	0.864949	-5.21627	-11.2632	-0.974651	-0.193935	-3.38417	3.37256	3.48333	14.2088	-0.846654	-3.92188	7.00629	4.36601	-6.14289	1.93475	-0.0297737	8.90213	4.11176	-2.52068	-2.85976	-17.4482	-3.98761	97	-10.8205	-9.647	0.835367	9.74652	22.371	-5.65739	-0.037859	7.66568	-0.9774	-0.14087	15.8044	-6.11006	2.77835	-23.9126	4.3419
98	4.35572	1.51856	2.53931	-2.24956	2.45779	-0.770538	3.25017	-3.4273	-1.73697	1.55473	1.19143	0.636876	-4.6341	-12.1811	-0.949038	-0.449673	-2.92602	2.93594	3.46089	16.1863	-0.786273	-3.48308	6.8439	3.90676	-6.78836	2.38592	0.0971259	10.0382	5.12419	-3.0143	-0.117855	-15.7707	-4.19101	98	-9.55299	-8.34456	5.35071	11.6688	23.248	-5.5067	-0.184641	7.52302	-0.385429	0.45739	15.7713	-6.24713	2.93127	-22.9278	4.1761
99	4.30616	1.74404	2.48382	-1.49769	0.863727	-0.849879	3.50879	-3.4164	-1.16629	1.41102	1.14002	0.430151	-4.0242	-12.7541	-0.955629	-0.421728	-2.49843	2.75257	3.24243	16.9392	-0.713883	-2.85296	5.90056	3.54609	-7.19786	2.66655	0.190004	10.5975	5.98318	-3.59165	1.52233	-14.3177	-4.16057	99	-7.73016	-6.12441	10.3415	12.6502	25.2597	-5.20959	-0.566199	7.55873	-0.0266258	0.566907	15.663	-6.39786	3.7386	-22.0725	4.02799
100	4.00711	2.05989	2.42489	-0.860074	-1.37104	-0.971308	3.78689	-3.35465	-0.655613	1.23855	1.24356	0.350698	-3.65317	-12.8877	-0.9995	-0.192756	-2.2562	2.13682	2.94008	17.0131	-0.563001	-3.13726	4.89935	3.2576	-7.39699	2.82422	0.0734321	11.1819	6.74801	-3.96213	3.27236	-13.499	-4.50855	100	-6.79815	-4.48072	14.2669	12.8451	26.6417	-4.61968	-1.03483	7.65982	0.228212	1.68744	15.0639	-6.51909	4.28156	-21.3093	3.8888
[truncated: 51 more columns]

## Sheet: UTLT Differences
COMB	C = CONTROL		P = PAIN																															Overhead Reach
% Motion	C02R	C03R	C04R	C06R	C07R	C10R	C12R	C18R	C21R	C02L	C03L	C04L	C06L	C07L	C10L	C12L	C18L	C21L	P01R	P04R	P05R	P06R	P07R	P08R	P09R	P01L	P02L	P03L	P04L	P05L	P06L	P07L	P09L	% Motion	C02R	C03R	C04R	C06R	C07R	C10R	C12R	C18R	C21R	C02L	C03L	C04L	C06L	C07L	C10L
1	0.283638	0.271924	1.04328	0.502016	-0.356537	0.774362	0.408951	0.459973	1.23216	0.382877	0.102888	0.0130437	-1.31134	-0.600864	0.0204613	0.322692	-0.0602879	1.88957	0.0598151	0.0809265	-0.0348586	-0.83364	-0.900143	-0.927029	0.201995	-0.258884	1.1777	-1.73538	0.330777	-0.576966	-0.382421	-0.153075	-0.655916	1	-0.00145831	-0.617178	-0.419518	-0.184242	-0.421886	-0.153227	0.0125142	0.000994715	0.170476	-0.0363491	0.200881	0.102089	0.255743	-0.199871	-0.0920933
2	0.267568	0.300089	0.984426	0.89563	-0.230375	0.740847	0.396568	0.347989	1.68492	0.384182	0.140016	0.0443666	-1.16008	-0.473374	0.0793574	0.23201	0.0748398	1.33108	0.0390861	0.20316	0.0286855	-0.666404	-0.783812	-0.926569	0.309652	-0.286462	0.963097	-1.70724	0.357914	-0.624336	-0.372302	-0.207779	-0.539343	2	-0.00968724	-0.292591	-0.515287	-0.0829031	-0.464365	-0.164484	0.0180342	0.0374448	-0.0332761	-0.0423949	0.226244	0.0541521	0.197405	-0.214385	-0.103514
3	0.234434	0.31634	0.964086	0.727537	0.138148	0.637297	0.351021	0.211525	1.56255	0.355623	0.185721	0.0774624	-1.00718	-0.333984	0.114119	0.153988	0.23733	1.27333	0.000811388	0.239919	0.160571	-0.533724	-0.60496	-0.9567	0.347111	-0.115475	0.781664	-1.57574	0.355998	-0.497794	-0.341935	-0.232256	-0.451468	3	-0.0144678	-0.0298888	-0.308084	-0.00018886	-0.485407	-0.173685	0.00793971	0.067205	-0.288997	-0.0372828	0.215637	0.0176918	0.101105	-0.229369	-0.119961
4	0.201711	0.524729	0.975694	0.536609	0.556942	0.454705	0.305948	0.0540851	1.80834	0.31605	0.191712	0.0776108	-0.587973	-0.197122	0.125285	0.110169	0.387488	1.58866	-0.0447549	0.26774	0.32103	-0.39045	-0.574038	-0.984044	0.339038	0.114514	0.687343	-1.48718	0.337699	-0.337416	-0.315278	-0.236511	-0.366881	4	-0.016056	0.109392	-0.103779	0.0374318	-0.544619	-0.183924	-0.0149952	0.0793121	-0.470982	-0.0334262	0.205497	-0.0201699	0.0781547	-0.230427	-0.135186
5	0.175224	0.701381	0.994909	0.383046	0.970776	0.305693	0.265113	-0.0783185	1.8207	0.291348	0.145997	0.0612509	-0.287723	-0.0555945	0.138668	0.0925364	0.523113	1.55483	-0.0902657	0.313241	0.435951	-0.315158	-0.591948	-0.998687	0.375653	0.174946	0.640134	-1.3535	0.317532	-0.185585	-0.349982	-0.239831	-0.261987	5	-0.0253577	0.136218	-0.0378857	0.0712049	-0.608635	-0.187884	-0.0322916	0.0679316	-0.436291	-0.0403465	0.176736	-0.0627845	0.0734956	-0.219811	-0.152287
6	0.144731	0.711813	1.08475	0.334918	1.32873	0.197227	0.235043	-0.166804	1.84274	0.286024	0.0859138	0.0526139	-0.0730566	-0.0180289	0.143256	0.0933309	0.594688	1.41455	-0.137884	0.265715	0.422165	-0.253287	-0.53207	-0.971005	0.375167	0.100729	0.585147	-1.24628	0.278638	0.0602113	-0.304744	-0.229896	-0.147961	6	-0.0359841	0.151556	-0.00706165	0.0897213	-0.694225	-0.187261	-0.0421065	0.0615775	-0.341818	-0.0434712	0.142627	-0.108207	0.0557299	-0.257531	-0.168141
7	0.124596	0.867465	1.22682	0.321305	1.58852	0.191943	0.21175	-0.212569	2.24296	0.260568	0.0483637	0.023259	0.210293	-0.166286	0.163136	0.104112	0.59276	1.41427	-0.217048	0.209394	0.286654	-0.277791	-0.571131	-0.909143	0.388007	0.0569353	0.493568	-1.12032	0.251772	0.306223	-0.2462	-0.219892	-0.0153622	7	-0.0419445	0.20874	-0.0445176	0.118969	-0.767346	-0.187578	-0.0444912	0.0612233	-0.171142	-0.0405469	0.1202	-0.146652	0.0510029	-0.313069	-0.173859
8	0.101285	0.999782	1.28431	0.210959	1.70614	0.265507	0.189458	-0.223601	2.13256	0.231661	0.0285321	-0.00154005	0.486297	-0.313335	0.169862	0.112412	0.585491	1.45837	-0.25931	0.166299	0.185477	-0.350444	-0.974515	-0.750683	0.264337	0.0451856	0.369918	-1.10303	0.240952	0.51109	-0.220024	-0.225471	0.145786	8	-0.0458583	0.321374	-0.12886	0.138458	-0.788453	-0.206505	-0.0410644	0.0538536	-0.0838015	-0.0328798	0.113836	-0.181581	0.0714242	-0.346617	-0.173496
9	0.0834715	1.05527	1.29565	0.0161138	1.58912	0.348483	0.169793	-0.195	1.33206	0.195067	0.0223799	0.012586	0.645366	-0.325243	0.152084	0.120746	0.606748	1.26645	-0.242402	0.100266	0.140739	-0.415537	-1.76542	-0.572212	0.0785006	0.0404088	0.2632	-1.18501	0.187899	0.65559	-0.175659	-0.238813	0.251211	9	-0.0466992	0.394667	-0.239095	0.131294	-0.768514	-0.221479	-0.0278045	0.0538082	-0.0683197	-0.0279413	0.098385	-0.218161	0.140644	-0.376836	-0.165926
10	0.081921	1.05311	1.35296	-0.362255	1.43238	0.372459	0.162097	-0.151405	0.974451	0.165712	0.0146348	0.0345417	0.639009	-0.215592	0.14257	0.128684	0.634197	1.20308	-0.240546	-0.00759311	0.0503502	-0.467745	-2.48357	-0.462929	-0.0113454	-0.0344757	0.251105	-1.29306	0.108851	0.731629	-0.151111	-0.260424	0.359949	10	-0.0404393	0.395286	-0.345538	0.0815589	-0.725614	-0.234612	-0.0177665	0.055121	-0.00634032	-0.0225536	0.0744234	-0.24488	0.207311	-0.427554	-0.168685
11	0.0769681	0.980778	1.3302	-0.874553	1.32463	0.37834	0.15943	-0.120325	0.71779	0.151786	0.00937999	0.0490452	0.57139	-0.135483	0.14657	0.12018	0.692679	1.12034	-0.255129	-0.137174	-0.0927581	-0.412316	-2.52228	-0.374121	-0.020026	-0.258211	0.250782	-1.45759	0.0418828	0.732915	-0.13921	-0.293819	0.455146	11	-0.0303588	0.364867	-0.451187	0.0318556	-0.702687	-0.24446	-0.0198298	0.0584847	0.0388895	-0.0128273	0.0636421	-0.26139	0.252871	-0.473737	-0.147366
12	0.0637373	0.921479	1.293	-1.24672	1.12972	0.392092	0.149497	-0.104433	0.294221	0.140838	0.0147866	0.0737026	0.525191	-0.102529	0.14125	0.0958743	0.782356	0.959755	-0.224462	-0.235915	-0.213837	-0.388648	-2.29776	-0.382623	-0.0068032	-0.426651	0.237996	-1.60464	0.0040519	0.700022	-0.137766	-0.309419	0.540951	12	-0.0204595	0.299918	-0.553071	0.00890581	-0.720664	-0.262758	-0.0450883	0.0710807	0.0986638	8.71108e-05	0.0639877	-0.269514	0.235728	-0.491452	-0.117051
13	0.0543076	0.92362	1.25279	-1.54425	0.889251	0.407036	0.141724	-0.0971077	-0.17989	0.124978	0.0215761	0.0849412	0.496268	-0.081522	0.129688	0.0726369	0.892169	0.859573	-0.213319	-0.302186	-0.272409	-0.426663	-2.17643	-0.454406	-0.00348448	-0.502537	0.300274	-1.7531	-0.0147096	0.66457	-0.0999889	-0.293284	0.631955	13	-0.013085	0.253571	-0.649846	-0.0683598	-0.72106	-0.27564	-0.0814521	0.0923801	0.207601	0.0125559	0.0682946	-0.268913	0.156942	-0.459215	-0.0968916
14	0.0477323	0.974757	1.13954	-1.40066	0.661563	0.40753	0.152193	-0.109671	-0.0602462	0.105056	0.0266252	0.0859924	0.615922	-0.0602933	0.119091	0.0588625	1.01839	0.755643	-0.207493	-0.344367	-0.300461	-0.439889	-1.70957	-0.513788	-0.0446249	-0.493638	0.280864	-1.84709	0.0468	0.592019	-0.0879626	-0.267909	0.679604	14	-0.00126318	0.250658	-0.770553	-0.154172	-0.726881	-0.285909	-0.127919	0.11655	0.284576	0.026077	0.082399	-0.267813	0.110415	-0.348274	-0.0875678
15	0.0466053	1.01634	0.986746	-0.98314	0.504635	0.413735	0.158595	-0.148877	-0.0488737	0.090575	0.0393529	0.0938062	0.75464	-0.0432894	0.0753751	0.0532961	1.11527	0.69394	-0.176953	-0.389551	-0.320808	-0.436912	-1.31529	-0.575212	-0.11428	-0.599315	0.200798	-1.82667	0.147101	0.535711	-0.0809329	-0.278011	0.728688	15	0.0100967	0.274375	-0.784314	-0.204944	-0.74107	-0.298612	-0.169133	0.144671	0.396123	0.0367756	0.114912	-0.269518	0.119782	-0.131947	-0.0881434
16	0.0477985	1.07552	0.849226	-0.727174	0.430461	0.359066	0.164476	-0.199462	-0.0602401	0.0779348	0.0598725	0.102925	1.0425	-0.0388157	0.0268059	0.0525222	1.1984	0.878076	-0.104458	-0.40882	-0.357166	-0.396453	-1.29893	-0.610826	-0.167823	-0.622534	0.132746	-1.80722	0.208196	0.461506	-0.0865765	-0.236863	0.772993	16	0.0200832	0.312937	-0.757622	-0.24885	-0.775634	-0.303916	-0.2069	0.172228	0.552823	0.0573601	0.112578	-0.269934	0.109401	0.0545171	-0.0916553
17	0.0466724	1.18276	0.831928	-0.669191	0.489881	0.317469	0.17452	-0.254722	0.606029	0.0666173	0.0883638	0.101772	1.31943	-0.039668	0.00338375	0.0567822	1.26762	1.06104	-0.0922565	-0.394698	-0.394215	-0.362103	-1.63597	-0.608467	-0.177206	-0.607462	0.0330802	-1.7957	0.285252	0.337088	-0.053843	-0.136376	0.73474	17	0.0315378	0.342863	-1.05253	-0.230473	-0.828894	-0.306183	-0.252492	0.180079	0.623955	0.0833251	0.0845266	-0.265407	0.11847	0.166891	-0.0944732
18	0.044852	1.28258	0.912553	-0.615313	0.512852	0.330115	0.179912	-0.292786	0.849983	0.0563295	0.119495	0.116119	1.45096	-0.0306142	-0.00514141	0.057758	1.30943	1.36412	-0.126806	-0.355381	-0.43291	-0.318176	-2.0127	-0.595224	-0.196549	-0.624722	-0.0536625	-1.67913	0.34549	0.21236	-0.024164	-0.0603895	0.66443	18	0.0418238	0.298666	-1.36281	-0.234413	-0.855066	-0.292474	-0.270208	0.180141	0.61011	0.102028	0.0500415	-0.260387	0.0106058	0.198601	-0.092351
19	0.038664	1.27088	0.973864	-0.661566	0.470621	0.368064	0.181577	-0.234309	0.425186	0.05209	0.149107	0.111258	1.398	-0.0227544	-0.00103856	0.0574306	1.34679	1.37632	-0.150408	-0.298561	-0.481056	-0.280924	-2.26905	-0.594752	-0.164179	-0.685004	-0.1263	-1.46886	0.307079	0.121262	-0.00634964	0.00241426	0.654551	19	0.0485724	0.230025	-1.47543	-0.280508	-0.869379	-0.256006	-0.262755	0.188049	0.569639	0.10363	0.0258497	-0.253513	-0.0413183	0.15753	-0.0900997
20	0.0326122	1.19712	1.03097	-0.683239	0.441596	0.415164	0.179903	-0.158824	0.282189	0.0539086	0.168264	0.0631947	1.40664	0.00359645	0.00272174	0.0553179	1.3779	1.31773	-0.176785	-0.244374	-0.536918	-0.26124	-2.4869	-0.599838	-0.113476	-0.658002	-0.147817	-1.26585	0.245518	0.0759871	0.0365577	0.0480362	0.659289	20	0.0536774	0.159943	-1.43174	-0.240232	-0.887416	-0.228915	-0.256323	0.168089	0.605563	0.0975054	0.00914825	-0.247871	-0.0320429	0.047476	-0.0899231
21	0.0321757	1.1322	1.16563	-0.552409	0.466711	0.475349	0.179776	-0.0554001	0.280375	0.05423	0.176996	-0.0056464	1.41892	0.0217378	-0.00372569	0.0484347	1.37671	1.2592	-0.184911	-0.214248	-0.572711	-0.242142	-2.3746	-0.578091	-0.111674	-0.578828	-0.113253	-1.05238	0.225294	0.0493778	0.069326	0.0879551	0.631831	21	0.0609766	0.123738	-1.31299	-0.225578	-0.935971	-0.188529	-0.239838	0.103247	0.725626	0.102768	-0.039771	-0.247364	-0.00566183	-0.0757587	-0.0724701
22	0.034803	1.0364	1.27752	-0.426158	0.512932	0.523028	0.180024	0.0696855	0.170287	0.0496506	0.19252	-0.0439334	1.48242	0.00543237	-0.0242297	0.0437416	1.3722	1.1811	-0.205476	-0.203235	-0.571555	-0.216533	-1.99638	-0.545183	-0.133733	-0.428693	-0.0860687	-0.987762	0.215011	0.0169237	0.10763	0.105885	0.571885	22	0.0727287	0.0410062	-1.22182	-0.191499	-1.04786	-0.162383	-0.236005	0.031742	0.602444	0.102866	-0.0918067	-0.24992	0.0912509	-0.149177	-0.0421199
23	0.0331926	0.91916	1.28993	-0.288815	0.541926	0.59158	0.171564	0.144441	0.162863	0.0467904	0.216509	-0.0833587	1.42658	-0.0209292	-0.0451034	0.0409115	1.3664	0.951663	-0.224824	-0.231259	-0.548707	-0.174398	-1.5256	-0.514682	-0.139313	-0.245747	-0.0887668	-1.05366	0.197122	-0.00326446	0.18103	0.114943	0.497613	23	0.0842498	-0.0934585	-1.26071	-0.205391	-1.14227	-0.11142	-0.222043	-0.0290204	0.34497	0.0823748	-0.173908	-0.253157	0.271592	-0.186478	-0.0328278
24	0.0323342	0.874714	1.23687	-0.214391	0.561552	0.640893	0.159358	0.200293	0.159727	0.0451699	0.265099	-0.123721	1.36178	-0.0690549	-0.0753027	0.0380493	1.34959	0.741895	-0.194613	-0.2552	-0.533873	-0.136652	-1.25795	-0.55815	-0.106149	-0.143027	-0.0675652	-1.11099	0.174052	0.00568832	0.297776	0.103983	0.43943	24	0.0903856	-0.212196	-1.34101	-0.236513	-1.20604	-0.0240384	-0.195954	-0.0383792	0.106124	0.0678198	-0.225864	-0.264368	0.38794	-0.241275	-0.00824252
25	0.0359219	0.894275	1.20413	-0.145916	0.556549	0.665264	0.143257	0.251803	0.141602	0.0443249	0.314467	-0.165608	1.37961	-0.183221	-0.0947498	0.0303364	1.31091	0.56325	-0.139258	-0.2637	-0.514922	-0.12323	-1.25525	-0.665205	-0.0839942	-0.00807361	-0.0325285	-1.08619	0.150521	-0.0410304	0.38306	0.0760062	0.453271	25	0.091656	-0.260922	-1.2352	-0.240266	-1.24129	0.0265679	-0.173806	-0.0370631	0.0360068	0.0638355	-0.264453	-0.281252	0.276452	-0.344433	0.00367676
26	0.0380229	0.863244	1.14359	-0.107202	0.554054	0.665421	0.130687	0.286454	0.125366	0.0413256	0.369939	-0.19957	1.43582	-0.276578	-0.100127	0.019403	1.26586	0.439356	-0.0829854	-0.29553	-0.472263	-0.12886	-1.53184	-0.782073	-0.10743	0.0705124	-0.0405346	-1.03396	0.141933	-0.116172	0.373578	0.000966981	0.43664	26	0.0825303	-0.218941	-1.14632	-0.267976	-1.256	0.0613688	-0.156352	-0.00479795	-0.384774	0.0631166	-0.306949	-0.304195	0.0728378	-0.462861	0.0193511
27	0.0406458	0.773493	1.08189	-0.0467922	0.569917	0.660472	0.121608	0.33666	0.0598433	0.0386759	0.431615	-0.198994	1.48505	-0.347416	-0.10349	0.00959952	1.19942	0.340502	-0.0200043	-0.271965	-0.433997	-0.116492	-1.58758	-0.879307	-0.118751	0.102928	-0.0757949	-0.938738	0.132572	-0.181984	0.327054	-0.0675786	0.367371	27	0.0725756	-0.148097	-1.14228	-0.264372	-1.30458	0.0846571	-0.159386	0.0430004	-0.706917	0.0541025	-0.300695	-0.326646	-0.0259378	-0.53629	0.0449038
28	0.0488207	0.685193	1.02571	0.0136679	0.596089	0.617263	0.117336	0.364044	0.116648	0.0399584	0.486074	-0.175253	1.45085	-0.362933	-0.110144	0.00225963	1.10471	0.289479	0.0271622	-0.190654	-0.415285	-0.110875	-1.50486	-1.0074	-0.0955785	-0.043347	-0.105956	-0.961008	0.121648	-0.217047	0.251715	-0.118065	0.347504	28	0.0689389	-0.150027	-1.23706	-0.203831	-1.33611	0.112645	-0.147356	0.108008	-0.720971	0.03416	-0.293226	-0.341482	-0.0487958	-0.553017	0.0532078
29	0.054137	0.566331	1.00615	0.0625249	0.591972	0.565069	0.118585	0.362261	0.131587	0.0417981	0.539277	-0.143067	1.45276	-0.355388	-0.125995	0.000146125	1.0444	0.33972	0.0601914	-0.106857	-0.410737	-0.0779369	-1.76521	-1.17887	-0.0293587	-0.122199	-0.127747	-1.08984	0.101924	-0.206164	0.184812	-0.15003	0.356984	29	0.0638715	-0.146872	-1.34547	-0.0821759	-1.29456	0.163385	-0.126673	0.189622	-0.604697	-0.00337556	-0.278385	-0.345882	0.0146995	-0.538427	0.0575699
30	0.056541	0.379355	1.06217	0.0832674	0.604775	0.491321	0.115986	0.371086	0.0740707	0.0441396	0.596949	-0.0990129	1.36805	-0.345823	-0.125672	-0.0033752	1.02512	0.243346	0.0603765	-0.0649333	-0.411458	-0.071966	-1.83054	-1.33172	0.0557698	-0.185701	-0.14354	-1.12328	0.0861888	-0.1896	0.167839	-0.139496	0.380163	30	0.0486769	-0.111865	-1.56044	-0.0185597	-1.23806	0.235154	-0.13026	0.251393	-0.458268	-0.0337957	-0.248434	-0.348806	0.0827252	-0.51764	0.0528052
31	0.0597945	0.193178	1.21117	0.151176	0.601159	0.456927	0.1102	0.403573	0.439515	0.0443252	0.654415	-0.0739526	1.1825	-0.332001	-0.121771	-0.00540688	0.996697	0.0183279	0.0392891	-0.0440167	-0.396423	-0.0666822	-1.51441	-1.44174	0.103179	-0.219291	-0.134588	-1.09425	0.0743405	-0.187894	0.200377	-0.118846	0.432642	31	0.0281306	-0.00207472	-1.77223	-0.00792734	-1.15122	0.275817	-0.149236	0.243834	-0.486285	-0.0580981	-0.225574	-0.354524	0.181458	-0.540897	0.052859
32	0.0640074	0.0470116	1.29539	0.182416	0.594967	0.439601	0.112576	0.40032	0.507863	0.0417307	0.716945	-0.0731497	0.992623	-0.276575	-0.118736	-0.00460027	0.966386	-0.0604429	0.0313635	-0.0373103	-0.384141	-0.0518809	-1.17586	-1.51615	0.10332	-0.212526	-0.0785131	-1.07235	0.0949868	-0.187774	0.193754	-0.0787251	0.506204	32	-0.00499905	0.160047	-1.84041	0.0245261	-0.969123	0.309369	-0.180472	0.200214	-0.469221	-0.0800746	-0.185232	-0.37439	0.264535	-0.603213	0.0322868
33	0.0689972	-0.0567611	1.34007	0.19594	0.539514	0.389945	0.11696	0.356923	0.614405	0.0357798	0.771931	-0.062869	0.799486	-0.239668	-0.123445	0.00129639	0.925914	-0.114328	0.000234713	-0.0451586	-0.380653	-0.0445134	-0.593641	-1.57199	0.068787	-0.229581	0.0356609	-1.02495	0.142871	-0.179859	0.154148	-0.0664261	0.58772	33	-0.035561	0.154545	-1.88714	0.0541607	-0.777627	0.34342	-0.208344	0.154033	-0.387712	-0.0827992	-0.155296	-0.405683	0.289195	-0.663083	-0.00842767
34	0.0730157	-0.148369	1.3855	0.200452	0.518099	0.336532	0.121064	0.296646	0.703014	0.0301219	0.82333	-0.0474532	0.688231	-0.216563	-0.126073	0.00829451	0.874099	0.0255729	-0.0115423	-0.0374862	-0.38326	-0.0320063	-0.235976	-1.60635	0.0273352	-0.234272	0.148304	-0.960568	0.175078	-0.153866	0.158842	-0.0634976	0.652775	34	-0.0560216	0.0733139	-1.86407	0.0982974	-0.637206	0.340403	-0.267406	0.139494	-0.196628	-0.077127	-0.112098	-0.432292	0.286519	-0.719775	-0.0680848
35	0.0744551	-0.205653	1.37803	0.168038	0.537254	0.328689	0.12123	0.245166	0.818824	0.0266293	0.869269	-0.0374643	0.531637	-0.225104	-0.116946	0.015208	0.809363	0.14129	-0.0242029	-0.0452237	-0.387517	-0.0270496	-0.0822663	-1.58659	-0.0189058	-0.191301	0.188562	-0.958182	0.198107	-0.11922	0.170153	-0.0574213	0.700015	35	-0.0652707	-0.0110638	-1.77951	0.210185	-0.525606	0.312633	-0.335556	0.187301	-0.161313	-0.0668747	-0.0776333	-0.438127	0.352521	-0.751551	-0.136621
36	0.0807989	-0.231234	1.41349	0.163368	0.537622	0.318686	0.117466	0.212331	0.677539	0.0245166	0.896215	-0.0233117	0.411132	-0.223289	-0.10526	0.0238818	0.774362	0.180882	-0.00994591	-0.0464737	-0.374757	-0.0387984	0.177939	-1.50903	-0.0727063	-0.124741	0.180671	-0.891096	0.208243	-0.0847126	0.18476	-0.052972	0.710883	36	-0.080396	-0.0957924	-1.6628	0.301935	-0.414643	0.287438	-0.401402	0.238014	-0.0866502	-0.0529977	-0.0492205	-0.436763	0.448263	-0.749126	-0.216131
37	0.0860755	-0.257783	1.51266	0.182047	0.521959	0.317906	0.112428	0.180585	0.468677	0.0247888	0.9071	-0.0175524	0.283459	-0.195648	-0.100258	0.0342107	0.737093	0.25686	0.00167369	-0.0487137	-0.339115	-0.0402619	0.315608	-1.47868	-0.125601	-0.0759807	0.178259	-0.717576	0.212803	-0.0396333	0.203342	-0.0378609	0.722061	37	-0.102325	-0.160147	-1.56509	0.377185	-0.323932	0.263119	-0.439513	0.249688	0.159889	-0.0410994	0.0043352	-0.445509	0.532279	-0.722727	-0.264567
38	0.0843876	-0.25784	1.63662	0.162606	0.463436	0.327116	0.102283	0.139901	0.32583	0.0260935	0.922852	-0.0568643	0.255285	-0.163759	-0.0959776	0.0456786	0.673893	0.245865	-0.0122636	-0.0300694	-0.284474	-0.0417654	0.261301	-1.45948	-0.174688	-0.0582889	0.183437	-0.534955	0.203303	0.0165966	0.217841	-0.01696	0.701107	38	-0.11498	-0.289413	-1.48509	0.421592	-0.293297	0.225084	-0.455536	0.238365	0.26533	-0.0363824	0.0556949	-0.455743	0.614438	-0.650449	-0.291602
39	0.074914	-0.262438	1.71054	0.153597	0.389796	0.332458	0.0959048	0.0868729	0.197523	0.0300719	0.933908	-0.0887236	0.214477	-0.138959	-0.084885	0.0508256	0.636087	0.231649	0.02435	-0.0210225	-0.233957	-0.0543892	0.261336	-1.3874	-0.25204	-0.0287688	0.145955	-0.473472	0.149564	0.0522626	0.249366	-0.00618789	0.667936	39	-0.128845	-0.401324	-1.3086	0.395465	-0.293291	0.202704	-0.440801	0.225373	0.133191	-0.0358196	0.0898344	-0.461105	0.604629	-0.530505	-0.312831
40	0.0603617	-0.265168	1.62825	0.163258	0.319625	0.318684	0.109286	0.0292213	0.11747	0.0354025	0.910989	-0.111083	0.174144	-0.121265	-0.0722343	0.0534586	0.610953	0.308496	0.0369705	-0.0181231	-0.185691	-0.0562252	0.456919	-1.32367	-0.31432	0.0185041	0.159716	-0.472838	0.0938105	0.0526154	0.308067	-0.0132154	0.612221	40	-0.133114	-0.45546	-1.05164	0.335663	-0.310443	0.170497	-0.405699	0.211392	0.0789104	-0.0435824	0.102621	-0.439717	0.547684	-0.33598	-0.341698
41	0.0475487	-0.250773	1.46565	0.136885	0.298993	0.307505	0.128317	0.00424382	0.112517	0.0374913	0.869451	-0.118989	0.12072	-0.106057	-0.0543756	0.0551019	0.581125	0.43139	0.0191025	-0.00879673	-0.137826	-0.0650605	0.546485	-1.2224	-0.278804	0.0713285	0.252732	-0.409567	0.0670238	0.0234237	0.34744	-0.0237029	0.584993	41	-0.13348	-0.495333	-0.845905	0.296254	-0.382142	0.15322	-0.352953	0.203238	-0.140575	-0.0674202	0.106816	-0.410684	0.517165	-0.155519	-0.38079
42	0.0389176	-0.232871	1.27486	0.117461	0.288726	0.298773	0.141934	0.00864887	0.100879	0.0405981	0.819658	-0.114023	0.112903	-0.0687828	-0.043652	0.0577841	0.565002	0.439109	-0.0115129	0.02171	-0.0848581	-0.0693259	0.718551	-1.08443	-0.243248	0.12302	0.333075	-0.254186	0.0546886	0.00212385	0.345423	-0.0283675	0.596225	42	-0.138466	-0.513956	-0.709087	0.228439	-0.428541	0.143597	-0.307926	0.246682	-0.369924	-0.0904334	0.0977782	-0.395613	0.46912	-0.00768128	-0.423246
43	0.0297283	-0.223948	1.15249	0.0835155	0.292799	0.288534	0.150676	0.00963546	0.152717	0.0425167	0.766261	-0.100782	0.113198	-0.0371604	-0.0262144	0.060144	0.573074	0.409851	-0.0181151	0.056576	-0.0436284	-0.0791359	0.733003	-0.892763	-0.225937	0.16844	0.362365	-0.198253	0.0471016	-0.00399714	0.388058	-0.0105507	0.609433	43	-0.139684	-0.521874	-0.622144	0.170089	-0.461018	0.145041	-0.226434	0.300977	-0.60945	-0.114792	0.0752565	-0.379287	0.393959	0.0918285	-0.446176
44	0.0216388	-0.233819	1.05438	0.0442916	0.269104	0.284251	0.143343	-0.00797163	0.351048	0.0462137	0.735807	-0.0806234	0.0878699	-0.0269223	-0.0110974	0.0606932	0.588136	0.36639	-0.0065175	0.0557644	-0.00274438	-0.0799547	0.548656	-0.699691	-0.21277	0.196975	0.372747	-0.19463	0.0648604	-0.000905246	0.397306	0.00740848	0.62655	44	-0.140432	-0.537109	-0.649509	0.13861	-0.560039	0.114695	-0.146241	0.339016	-0.824446	-0.142668	0.0745946	-0.373146	0.348388	0.171814	-0.464083
45	0.0142087	-0.248778	0.956759	-0.00380573	0.235156	0.275737	0.136002	-0.0326903	0.459014	0.0518087	0.709887	-0.0805534	0.0532142	-0.0937997	-0.001138	0.0596167	0.598664	0.351117	-0.0252405	0.0684483	0.0290586	-0.0711923	0.0457274	-0.528487	-0.185654	0.158204	0.347195	-0.209734	0.0842327	-0.00240224	0.356811	0.0249379	0.632454	45	-0.139714	-0.583137	-0.702911	0.0991944	-0.743065	0.0979676	-0.0504951	0.351083	-0.868196	-0.158446	0.0956197	-0.39044	0.253102	0.258409	-0.482257
46	0.0089492	-0.260494	0.879923	-0.0227397	0.209455	0.244985	0.1321	-0.0676042	0.316604	0.0533091	0.677919	-0.0970603	0.0346179	-0.20595	0.0245309	0.0555962	0.610734	0.349902	-0.0360465	0.0662391	0.0409442	-0.0597726	-0.207977	-0.36192	-0.160615	0.0947329	0.288291	-0.234336	0.100107	0.0115122	0.264115	0.0414947	0.63226	46	-0.140538	-0.680097	-0.700527	0.0443408	-0.847513	0.0985898	-0.0258539	0.328196	-1.35133	-0.16456	0.121818	-0.428582	0.121609	0.271526	-0.500133
47	0.00731349	-0.272524	0.810533	-0.011721	0.190141	0.233303	0.136794	-0.106602	0.136417	0.0555767	0.657174	-0.1272	0.0296952	-0.273544	0.0489233	0.0502411	0.610914	0.320499	-0.0370967	0.0448503	0.0536166	-0.0531163	-0.588501	-0.222202	-0.14998	0.0484059	0.21292	-0.254059	0.1214	0.0407657	0.182128	0.0343279	0.654813	47	-0.142825	-0.792347	-0.657187	0.00483353	-0.903735	0.0826732	-0.0403864	0.295039	-1.57328	-0.161483	0.128769	-0.480582	-0.00424202	0.274493	-0.495133
48	0.00952619	-0.25677	0.752137	-0.0014679	0.157154	0.230169	0.153392	-0.142872	0.0361179	0.0595921	0.639965	-0.158232	0.0401469	-0.311887	0.0674921	0.0430891	0.594146	0.315099	-0.0468719	-0.00821087	0.0627382	-0.0562912	-0.684966	-0.0843854	-0.157145	0.0554799	0.163251	-0.242719	0.125408	0.0633684	0.176195	0.0120864	0.699628	48	-0.14948	-0.850805	-0.587671	-0.0225975	-1.03909	0.089199	-0.0528256	0.281587	-1.70896	-0.17864	0.116683	-0.546279	-0.0688767	0.312769	-0.482465
49	0.0097132	-0.246206	0.738787	0.0164191	0.153066	0.231822	0.168801	-0.178592	0.0709228	0.0621532	0.606307	-0.178291	0.0051311	-0.334146	0.0849885	0.0389139	0.57527	0.336724	-0.0285091	-0.0833993	0.0738694	-0.0300574	-0.849884	0.0123779	-0.170489	0.048833	0.138051	-0.20889	0.138322	0.0666392	0.16362	-0.00254313	0.74439	49	-0.166668	-0.91884	-0.600068	-0.107895	-1.21537	0.0911765	-0.0256925	0.287339	-1.51746	-0.21568	0.121446	-0.624121	-0.115138	0.42407	-0.50211
50	0.0112284	-0.224934	0.722333	0.048607	0.175507	0.220568	0.18244	-0.198341	0.150745	0.0636323	0.553642	-0.211716	-0.0291692	-0.331088	0.0948307	0.0375636	0.541575	0.364974	-0.0300076	-0.133836	0.0956898	-0.0148114	-1.02227	0.133837	-0.180566	0.0265806	0.0914109	-0.141636	0.160882	0.0825961	0.176265	-0.00089304	0.751503	50	-0.178195	-1.03029	-0.884349	-0.259073	-1.41604	0.0721229	-0.00895265	0.325747	-2.2374	-0.245574	0.119241	-0.710018	-0.11253	0.644078	-0.506646
51	0.0122656	-0.18649	0.691017	0.0619662	0.203877	0.204431	0.199528	-0.205366	0.215309	0.0623802	0.489231	-0.24636	-0.0642055	-0.335854	0.0917323	0.0401852	0.50467	0.368243	-0.0242227	-0.165315	0.10937	-0.00378557	-1.04875	0.249632	-0.212245	-0.00116021	0.0168609	-0.0923843	0.179615	0.0920085	0.189987	0.00468952	0.668859	51	-0.192039	-1.0617	-1.20494	-0.279487	-1.63321	0.0566674	0.00788766	0.34667	-3.49841	-0.291118	0.116944	-0.803304	-0.0811031	0.926905	-0.502177
52	0.0126151	-0.152184	0.67445	0.0298948	0.20598	0.190092	0.213543	-0.202196	0.126617	0.0591497	0.4232	-0.256247	-0.0840174	-0.34003	0.0857459	0.0433052	0.492144	0.283417	-0.0319268	-0.176129	0.102415	0.0136943	-1.0936	0.294035	-0.257719	-0.0744584	-0.022874	-0.0912257	0.179297	0.0769142	0.197266	-0.00890125	0.580165	52	-0.1996	-1.04485	-1.71985	-0.262453	-1.94508	0.0428245	-0.0011283	0.38613	-4.37417	-0.321482	0.107557	-0.881401	-0.124495	1.34185	-0.503353
53	0.013211	-0.132551	0.651847	0.0266563	0.220113	0.167345	0.221388	-0.193088	0.190787	0.0533189	0.364035	-0.258006	-0.0870783	-0.333094	0.0778073	0.0457646	0.472283	0.38918	-0.034543	-0.187915	0.0873463	0.0230324	-1.13226	0.284539	-0.330111	-0.119553	-0.056476	-0.107806	0.156263	0.0556902	0.243305	-0.0252056	0.526096	53	-0.188604	-1.04386	-2.24096	-0.313092	-2.3311	0.0221073	-0.017702	0.371545	-5.94002	-0.31512	0.10327	-0.933985	-0.238028	1.82034	-0.465791
54	0.00936386	-0.116388	0.661774	0.0213097	0.258326	0.165794	0.229195	-0.177586	0.246573	0.0476971	0.310685	-0.2509	-0.0953118	-0.297382	0.0635285	0.0486116	0.442593	0.401603	-0.0578035	-0.190056	0.0801619	0.0115525	-1.09981	0.234425	-0.366407	-0.107903	-0.0966767	-0.102502	0.13909	0.0637181	0.308657	-0.0366845	0.520918	54	-0.184917	-0.999318	-2.84903	-0.324976	-2.9296	-0.00491703	-0.0261495	0.283644	-7.39468	-0.316013	0.109838	-0.974274	-0.284805	2.19569	-0.398715
55	0.00251882	-0.0951117	0.646824	0.0360282	0.287767	0.187824	0.240516	-0.155658	0.187457	0.0447021	0.269214	-0.237744	-0.10207	-0.228056	0.0424031	0.0508445	0.426962	0.420908	-0.0620429	-0.2004	0.071986	-0.0250736	-1.12411	0.149991	-0.390498	-0.073109	-0.136319	-0.0799084	0.135958	0.0591513	0.380961	-0.0491013	0.500416	55	-0.183137	-0.969476	-3.73209	-0.381158	-3.54702	-0.0183841	-0.0154615	0.157957	-8.97919	-0.340182	0.106255	-1.01668	-0.278092	2.10214	-0.344805
56	-0.00845058	-0.0926034	0.57814	0.0461519	0.2941	0.180693	0.245475	-0.136284	0.135471	0.0429013	0.246012	-0.235368	-0.119906	-0.177172	0.0229464	0.0517673	0.417062	0.43521	-0.0366845	-0.189089	0.0665864	-0.0558152	-1.19108	0.0539124	-0.394999	-0.0145866	-0.192479	-0.0682341	0.137976	0.0453658	0.427853	-0.0411953	0.459833	56	-0.170924	-0.986346	-4.92188	-0.407298	-3.94649	-0.0092044	0.0130284	0.0260072	-9.66445	-0.380475	0.09015	-1.06275	-0.240111	2.10646	-0.304336
57	-0.0176932	-0.0909177	0.518533	0.0543356	0.291324	0.163455	0.240903	-0.115043	-0.0935057	0.0399988	0.237503	-0.236905	-0.0667432	-0.169468	0.0161483	0.0511867	0.406364	0.5229	-0.0330505	-0.214679	0.0714103	-0.0694822	-1.16835	-0.0443916	-0.373452	0.00573384	-0.246984	-0.0634642	0.145489	0.0244185	0.354855	-0.0124588	0.387119	57	-0.186833	-0.963958	-6.53695	-0.447131	-4.053	-0.00338861	0.00938951	-0.127484	-9.13777	-0.44093	0.0734578	-1.12661	-0.222533	2.31975	-0.294063
58	-0.026073	-0.0764398	0.504636	-0.000939653	0.291464	0.16558	0.239668	-0.0941325	-0.296644	0.0329482	0.235502	-0.247425	-0.0154725	-0.194467	0.00683656	0.0485557	0.395785	0.603925	-0.039157	-0.281984	0.0685111	-0.082606	-1.07985	-0.130778	-0.326127	0.016632	-0.262005	-0.0705598	0.153752	0.0299186	0.303419	0.0223476	0.300408	58	-0.218221	-0.872816	-8.80511	-0.497666	-4.11341	-0.0215062	-0.00217307	-0.228876	-8.31383	-0.506689	0.0564189	-1.20286	-0.237224	2.66506	-0.318977
59	-0.0343108	-0.051425	0.538133	-0.0902986	0.308249	0.182897	0.24374	-0.074375	-0.335214	0.0253132	0.230318	-0.25807	-0.00588638	-0.237002	-0.0033974	0.0465866	0.38589	0.569678	-0.00205135	-0.328722	0.0536947	-0.0857497	-0.997553	-0.196226	-0.276046	0.0398826	-0.250499	-0.0934703	0.136237	0.0524299	0.273961	0.0444263	0.229286	59	-0.216882	-0.79246	-12.0825	-0.522796	-4.05512	-0.0613424	-0.00670414	-0.225853	-7.80603	-0.548822	0.0233904	-1.27472	-0.270334	3.05609	-0.317967
60	-0.0405806	-0.0230928	0.570937	-0.108126	0.331815	0.194907	0.254862	-0.0538867	-0.284777	0.0190899	0.216957	-0.241724	-0.00583221	-0.256376	-0.0208981	0.0436844	0.371105	0.492372	0.0342415	-0.303118	0.0363848	-0.0585033	-1.04655	-0.244789	-0.173217	0.0384778	-0.226044	-0.0906648	0.103876	0.0941341	0.219429	0.0398943	0.165492	60	-0.200068	-0.747799	-14.8	-0.672382	-3.67338	-0.0552988	-0.0238135	-0.281458	-8.20962	-0.591014	-0.0186897	-1.36988	-0.393017	3.3486	-0.288949
61	-0.0462413	0.00631259	0.575865	-0.0956863	0.367628	0.180376	0.25871	-0.0337416	-0.276918	0.0154875	0.195211	-0.21173	-0.0114896	-0.281633	-0.04782	0.0407017	0.350723	0.42938	0.0358953	-0.236461	0.0159787	-0.0439791	-1.12632	-0.305244	-0.0623869	0.0070187	-0.198417	-0.0923387	0.079676	0.11848	0.222707	0.0344528	0.107664	61	-0.205141	-0.667368	-14.3709	-0.674367	-2.98512	-0.0673886	-0.0773882	-0.417029	-9.74477	-0.695188	-0.0513493	-1.49575	-0.547432	3.12463	-0.249714
62	-0.0511297	0.0432288	0.557477	-0.0858164	0.394439	0.154818	0.26765	-0.0120939	-0.230991	0.014839	0.163256	-0.191832	-0.00583248	-0.308045	-0.0762428	0.0411889	0.328271	0.437366	0.0183864	-0.177713	0.00692213	-0.0642343	-1.19076	-0.374138	0.0138427	0.0113874	-0.20224	-0.0959921	0.0331318	0.129311	0.214631	0.0267205	0.0627196	62	-0.230464	-0.598857	-12.8685	-0.656807	-2.31416	-0.0803351	-0.0845751	-0.586054	-10.5498	-0.841168	-0.0768686	-1.6388	-0.615377	2.50586	-0.238682
63	-0.0509002	0.040839	0.523665	-0.0579916	0.427778	0.128997	0.279594	0.00673405	-0.295907	0.0178129	0.125562	-0.172816	0.0102268	-0.350275	-0.0897114	0.0446296	0.317931	0.441357	0.00228565	-0.117125	0.00100198	-0.0666531	-1.24473	-0.407511	0.0577189	0.0713085	-0.196471	-0.0618442	0.00348024	0.123261	0.196449	0.0102043	0.0487477	63	-0.279762	-0.592848	-12.0949	-0.624531	-1.86941	-0.068889	-0.101723	-0.630047	-11.456	-0.964667	-0.083709	-1.77646	-0.610246	1.91341	-0.260256
64	-0.045202	0.0334832	0.47405	-0.0226356	0.431224	0.109893	0.292324	0.02157	-0.32906	0.0216164	0.0938428	-0.153834	0.0276008	-0.422245	-0.102742	0.0485505	0.30876	0.509378	-0.00895599	-0.0542431	-0.00613575	-0.0687713	-1.20275	-0.400234	0.08675	0.110176	-0.164664	-0.0248309	-0.0127099	0.107806	0.185331	0.0163203	0.0702839	64	-0.358087	-0.663732	-11.8312	-0.55994	-1.59897	-0.035009	-0.147305	-0.408489	-12.6434	-1.11327	-0.0928828	-1.90711	-0.591991	1.34163	-0.271628
65	-0.04047	0.0233223	0.412095	0.0188031	0.438438	0.0934805	0.305233	0.0334912	-0.322277	0.0276608	0.0781609	-0.133818	0.0518552	-0.491332	-0.116708	0.0507343	0.304595	0.539636	-0.00680439	-0.0233247	-0.0146273	-0.0652026	-1.0771	-0.372159	0.140601	0.111465	-0.136234	0.0143076	-0.0227317	0.0790827	0.111573	0.0389367	0.105014	65	-0.452674	-0.685566	-11.6019	-0.57902	-1.40896	0.0135307	-0.227847	-0.255375	-13.0431	-1.32357	-0.107746	-2.01901	-0.56685	0.867747	-0.221172
66	-0.0392624	0.03768	0.322313	0.0613492	0.449444	0.0844365	0.31789	0.0431418	-0.247834	0.0318025	0.0671258	-0.106481	0.0740832	-0.547342	-0.137026	0.0507393	0.300964	0.580034	0.00870832	-0.0263612	-0.0218167	-0.0798412	-0.835832	-0.318176	0.191	0.0979148	-0.0980753	0.0340902	-0.0112535	0.0677653	0.0724335	0.0579674	0.143895	66	-0.539755	-0.748005	-11.3196	-0.609048	-1.13457	0.0527273	-0.299967	-0.19166	-12.158	-1.53611	-0.123529	-2.10435	-0.520724	0.166078	-0.167964
67	-0.0395484	0.042554	0.249969	0.0685705	0.488078	0.084439	0.341157	0.0594164	-0.197481	0.0321777	0.0590789	-0.0788733	0.0925372	-0.608092	-0.14956	0.0481354	0.298755	0.578301	0.032529	-0.0215963	-0.0181142	-0.080247	-0.522137	-0.242873	0.210287	0.0902393	-0.0633498	0.0507194	0.0156099	0.0641754	0.0596638	0.0835514	0.223112	67	-0.577046	-0.765133	-10.549	-0.523815	-0.589527	0.0835994	-0.353947	-0.0610793	-10.3479	-1.70231	-0.135246	-2.19881	-0.479336	-0.521587	-0.140105
68	-0.0418626	0.0545629	0.183324	0.0334524	0.512357	0.0758272	0.362378	0.0743807	-0.176282	0.0333831	0.0667676	-0.0580234	0.13735	-0.684538	-0.158267	0.0422844	0.287693	0.549604	0.0769726	-0.0264631	-0.0153456	-0.0902727	-0.282782	-0.168142	0.174511	0.0754756	-0.0277121	0.0630372	0.0307133	0.0515619	0.0563887	0.102742	0.301975	68	-0.604263	-0.716209	-9.28581	-0.56446	-0.601253	0.131846	-0.406084	0.105307	-9.18948	-1.82125	-0.155427	-2.29833	-0.393286	-0.978988	-0.16915
69	-0.0429808	0.0573657	0.128657	-0.00445963	0.514347	0.0720493	0.383216	0.0859943	-0.147524	0.0341654	0.0887509	-0.0429958	0.188304	-0.746627	-0.165795	0.0379317	0.272952	0.603695	0.0829207	-0.0277308	-0.0172853	-0.0875952	-0.0757556	-0.140741	0.109867	0.0748688	-0.0177391	0.0711034	0.052923	0.0364334	0.0867295	0.128674	0.361301	69	-0.609002	-0.72642	-7.96566	-0.583915	-1.13366	0.197466	-0.436131	0.191628	-8.19504	-1.84085	-0.170532	-2.39978	-0.236175	-1.32781	-0.210471
70	-0.0399063	0.0716779	0.0900108	0.00856834	0.506468	0.071089	0.405805	0.103042	-0.220005	0.0356544	0.112028	-0.0173304	0.226611	-0.760691	-0.165472	0.0343162	0.254958	0.629679	0.0844151	-0.0210083	-0.0233398	-0.0827277	0.111586	-0.107502	-0.012785	0.0955461	-0.0214182	0.0631345	0.068568	0.0228916	0.124382	0.145713	0.400767	70	-0.533022	-0.786968	-6.51401	-0.602852	-1.88633	0.244458	-0.507598	0.259693	-6.87261	-1.80243	-0.183529	-2.57087	-0.0800919	-1.62943	-0.264799
71	-0.0331151	0.100326	0.0508398	0.0129883	0.487926	0.0684394	0.427123	0.123697	-0.291515	0.0392177	0.125916	0.010668	0.253594	-0.721234	-0.171683	0.0309693	0.22692	0.571588	0.0537311	-0.00269605	-0.0140997	-0.063914	0.281682	-0.0586497	-0.100423	0.113337	-0.000677461	0.0372529	0.0664481	0.00963484	0.151449	0.142704	0.42299	71	-0.414396	-0.820246	-5.24837	-0.539615	-2.59642	0.275928	-0.590188	0.405777	-4.4605	-1.76979	-0.200695	-2.78757	-0.0291359	-1.72638	-0.276878
72	-0.027258	0.123045	0.0010184	0.00401311	0.489388	0.0447912	0.426393	0.139294	-0.289002	0.0451154	0.123493	0.0297526	0.281598	-0.651165	-0.184339	0.0273252	0.200037	0.472897	0.0238053	0.0212626	0.0161173	-0.0686987	0.406358	-0.0282679	-0.108846	0.13112	0.00187127	0.0107664	0.0685867	-0.0104661	0.172667	0.130885	0.464667	72	-0.314324	-0.813754	-4.42259	-0.445834	-2.82501	0.252358	-0.664158	0.533005	-2.18469	-1.57823	-0.226482	-2.99603	-0.104303	-1.86641	-0.211787
73	-0.0221808	0.143508	-0.0710105	0.0191334	0.477404	0.0191248	0.422295	0.153155	-0.339856	0.0528606	0.120695	0.0387082	0.299562	-0.552811	-0.191258	0.0245885	0.178215	0.414271	-0.0191781	0.0490491	0.0615812	-0.0785879	0.449084	-0.0224687	-0.107634	0.105484	-0.00167737	-0.00945517	0.0936802	-0.0315054	0.162209	0.121161	0.498432	73	-0.210789	-0.807144	-3.95522	-0.328649	-3.12135	0.157035	-0.695154	0.60172	0.38098	-1.38233	-0.267052	-3.1918	-0.1368	-2.02431	-0.161883
74	-0.0152036	0.170796	-0.122228	0.0487913	0.469413	0.00477387	0.427087	0.166077	-0.370808	0.0570987	0.128098	0.0462038	0.301601	-0.467994	-0.203046	0.0227793	0.157108	0.312945	-0.0533209	0.0829489	0.104659	-0.084557	0.424006	-0.0270105	-0.132556	0.0734518	0.0328921	-0.0322851	0.11118	-0.0601838	0.164917	0.117929	0.529165	74	-0.105112	-0.795931	-3.71979	-0.282363	-3.35635	0.0416937	-0.693016	0.734289	1.77844	-1.27546	-0.276975	-3.40922	-0.0849175	-2.05596	-0.128252
75	-0.00857266	0.195315	-0.102303	0.0807254	0.450729	0.0146835	0.424817	0.17674	-0.318813	0.0576112	0.136525	0.0744107	0.308097	-0.396104	-0.195345	0.0247263	0.139348	0.236053	-0.0478639	0.100348	0.149558	-0.0861909	0.306881	-0.0161443	-0.142601	0.0690812	0.0650613	-0.0567342	0.165074	-0.099883	0.164103	0.112487	0.568192	75	-0.0528829	-0.764778	-3.61255	-0.314893	-3.03043	-0.029498	-0.682772	0.812982	2.30013	-1.13707	-0.266279	-3.69634	-0.0757919	-1.97333	-0.0657159
76	-0.00431557	0.20093	-0.0623117	0.12564	0.473416	0.0276968	0.411041	0.197269	-0.272514	0.0579856	0.143042	0.115902	0.323722	-0.34653	-0.167257	0.0374311	0.1236	0.164621	-0.0435417	0.125715	0.18564	-0.093976	0.201522	0.046144	-0.126765	0.0913651	0.067722	-0.078715	0.192472	-0.140909	0.163013	0.104759	0.554385	76	0.0144844	-0.738222	-3.63708	-0.419321	-2.67122	-0.0605789	-0.692301	1.03316	3.05136	-0.932663	-0.242731	-4.01345	-0.163393	-1.66053	0.00602619
77	-0.0010313	0.224035	-0.0341379	0.164613	0.491403	0.043305	0.39611	0.219647	-0.181926	0.0606503	0.144478	0.160799	0.325604	-0.318124	-0.147752	0.0494747	0.113087	0.104326	-0.0235548	0.129911	0.207422	-0.0786414	0.127915	0.102707	-0.0765699	0.144104	0.0869836	-0.0862019	0.188912	-0.170041	0.16298	0.093841	0.5085	77	0.0405816	-0.738719	-3.70214	-0.653427	-2.0998	-0.0898513	-0.738083	1.07378	2.85811	-0.622651	-0.202605	-4.31648	-0.255604	-1.00609	0.0163306
78	-0.000311575	0.242618	-0.0233891	0.174347	0.466698	0.0328384	0.396804	0.226675	-0.205751	0.0636172	0.142964	0.178948	0.341459	-0.309358	-0.126354	0.0560929	0.105652	0.139768	0.00784606	0.153513	0.231789	-0.0563996	0.0423925	0.117259	-0.0145543	0.178196	0.122477	-0.0821019	0.180118	-0.157711	0.157943	0.0896392	0.479154	78	0.0780881	-0.783848	-3.84611	-0.836645	-1.42026	-0.0951234	-0.759664	0.975739	0.892704	-0.337074	-0.171826	-4.61669	-0.27815	-0.0453597	0.0403774
79	0.000222183	0.241597	-0.0174885	0.179134	0.430804	0.0348279	0.410341	0.235464	-0.286394	0.0627776	0.139898	0.179802	0.370038	-0.302709	-0.11133	0.0641183	0.0970937	0.146041	0.00443299	0.181795	0.222104	-0.0254796	-0.0356922	0.111281	0.0289901	0.207657	0.157198	-0.0760862	0.199117	-0.146214	0.128327	0.0987122	0.466311	79	0.113053	-0.847935	-3.81878	-0.88659	-0.456359	-0.0884234	-0.689047	0.855647	-1.88371	-0.166446	-0.146987	-4.95628	-0.328128	0.947686	0.0575309
80	0.000733144	0.231014	0.00369033	0.198465	0.384731	0.0641424	0.410287	0.245566	-0.341306	0.0624706	0.132642	0.183001	0.39441	-0.272825	-0.0845436	0.0757683	0.0942984	0.13763	0.0121642	0.21156	0.195998	-0.00386356	-0.124289	0.0852385	0.0836525	0.219425	0.184756	-0.061245	0.206279	-0.135218	0.106537	0.098229	0.473781	80	0.165932	-0.912112	-3.83837	-0.896769	0.763589	-0.135471	-0.654985	0.736222	-2.96857	0.0206448	-0.140921	-5.36539	-0.360065	2.11256	0.0377095
81	0.00372334	0.227652	0.0264429	0.222702	0.385787	0.0921296	0.413228	0.241804	-0.383964	0.0627956	0.117691	0.187514	0.412456	-0.234642	-0.0596416	0.0879651	0.090949	0.0822806	-0.0113578	0.245608	0.156224	0.00896108	-0.156419	0.0535968	0.118637	0.240828	0.196198	-0.0443399	0.207072	-0.131661	0.109655	0.0903633	0.520397	81	0.241434	-0.980561	-4.07147	-0.950211	2.347	-0.220301	-0.67971	0.685694	-2.42777	0.13367	-0.141917	-5.81697	-0.323818	3.7588	-0.00200981
82	0.0121161	0.221757	0.0401147	0.245846	0.423843	0.104338	0.417525	0.23023	-0.39968	0.0644665	0.0983741	0.185396	0.436872	-0.202138	-0.031671	0.100123	0.0872359	0.0115922	-0.0287188	0.266921	0.110935	0.0115258	-0.159271	0.0397288	0.11172	0.245138	0.229549	-0.0314054	0.198448	-0.107897	0.140061	0.0864375	0.569738	82	0.329298	-1.09571	-4.40061	-1.03283	3.96075	-0.329216	-0.772863	0.613857	-1.62444	0.169194	-0.148436	-6.22	-0.285414	5.21069	-0.0283996
83	0.0241729	0.215277	0.0575974	0.262284	0.446071	0.109935	0.430153	0.214958	-0.378081	0.0660573	0.0844448	0.172671	0.448241	-0.187307	-0.00924131	0.108384	0.0883079	0.0346962	-0.0441672	0.225612	0.0701402	0.00448448	-0.160709	0.0272919	0.0884852	0.228135	0.248715	-0.0229849	0.188696	-0.0709932	0.170758	0.0773199	0.597416	83	0.406908	-1.11896	-4.62179	-1.30468	5.16958	-0.427995	-0.889513	0.566696	-1.67954	0.143391	-0.164499	-6.5971	-0.256056	6.69297	-0.0424119
84	0.031456	0.195633	0.0897401	0.270385	0.47796	0.113516	0.452544	0.193678	-0.381489	0.0652354	0.0695301	0.153586	0.448102	-0.168554	0.0106467	0.115971	0.0893496	0.047177	-0.0669859	0.192061	0.0529915	-0.00704298	-0.110187	0.00462637	0.0826559	0.214888	0.248261	-0.0169422	0.185358	-0.0315122	0.16798	0.0659179	0.558989	84	0.414394	-1.05559	-4.6229	-1.74468	6.40505	-0.523927	-0.914588	0.535544	-1.72879	0.100493	-0.18507	-7.01623	-0.310348	8.00668	-0.0757546
85	0.0315702	0.163818	0.15451	0.269839	0.520424	0.0956764	0.475926	0.173525	-0.411067	0.0626028	0.0552263	0.156739	0.44232	-0.144789	0.0391012	0.123465	0.0945169	0.0607888	-0.137428	0.186402	0.0408933	-0.0240668	-0.0470421	-0.0308832	0.0782122	0.208315	0.235037	-0.0163692	0.176332	0.00700247	0.160429	0.0654848	0.518805	85	0.358318	-0.965929	-4.51156	-2.08487	7.86408	-0.566727	-0.8745	0.520173	-2.28227	0.0769207	-0.202318	-7.53428	-0.370888	9.41077	-0.0822774
86	0.028656	0.138913	0.211066	0.269198	0.528306	0.0627339	0.484823	0.157052	-0.458235	0.0583289	0.0456517	0.172137	0.450487	-0.141664	0.0668547	0.126392	0.0997822	0.130436	-0.172968	0.203617	0.0248066	-0.0354414	0.00694861	-0.0476584	0.0936432	0.212156	0.210998	-0.0164439	0.163647	0.0458349	0.152691	0.0716412	0.523573	86	0.276605	-0.880439	-4.42027	-2.23532	9.04429	-0.551819	-0.910878	0.444076	-3.19149	0.0736075	-0.214608	-8.02717	-0.463361	11.5127	0.00861702
87	0.021722	0.135585	0.288933	0.267786	0.480033	0.0442874	0.482123	0.142	-0.488731	0.0579882	0.0471658	0.184182	0.459049	-0.151544	0.0892576	0.125285	0.10395	0.122918	-0.164976	0.22173	0.00398325	-0.0332083	0.0813458	-0.0566365	0.104757	0.203894	0.190893	-0.0138269	0.143421	0.0682634	0.151065	0.0655779	0.498116	87	0.234399	-0.82572	-4.38183	-2.09133	9.68379	-0.565306	-0.912691	0.473266	-3.04269	0.0911516	-0.237568	-8.44996	-0.486334	13.8607	0.0566567
88	0.0138548	0.160678	0.343561	0.232709	0.442892	0.031073	0.468551	0.123434	-0.495336	0.0612882	0.0501159	0.183301	0.472043	-0.151726	0.107326	0.120629	0.119022	0.164282	-0.177278	0.193313	-0.0124982	-0.0180102	0.131245	-0.0782362	0.103542	0.182816	0.147241	-0.00113063	0.119813	0.0708742	0.159612	0.0722659	0.45768	88	0.2491	-0.729471	-4.31513	-1.866	9.71659	-0.581467	-0.897075	0.59431	-2.45646	0.0353828	-0.242947	-8.86002	-0.454519	15.962	0.0486179
89	0.00749532	0.176479	0.389418	0.192546	0.415148	0.0291745	0.457582	0.100221	-0.451338	0.0661366	0.0514651	0.178898	0.487491	-0.160894	0.112042	0.111804	0.142421	0.146589	-0.164972	0.134006	-0.0176452	0.0144002	0.152328	-0.109583	0.110134	0.143622	0.0965218	0.0138145	0.0989323	0.0710388	0.146305	0.0944899	0.43393	89	0.309947	-0.598814	-4.3489	-1.67605	9.50008	-0.586359	-0.819359	0.730341	-1.47301	-0.0515446	-0.230077	-9.34679	-0.430089	17.6768	0.0848252
90	0.00297377	0.189152	0.430536	0.17572	0.386097	0.0415537	0.45001	0.0760043	-0.453454	0.0776956	0.0525865	0.184271	0.503695	-0.193612	0.111476	0.0982825	0.170229	0.141052	-0.184664	0.0798313	-0.0211023	0.0348927	0.161303	-0.136034	0.109857	0.104309	0.0680534	0.024866	0.0780116	0.0621741	0.129476	0.116781	0.39543	90	0.323387	-0.515577	-4.39379	-1.40141	8.72411	-0.616206	-0.748498	0.923044	-0.934557	-0.154659	-0.173795	-9.93302	-0.443076	18.9694	0.0924819
91	-0.00186423	0.205283	0.475051	0.175153	0.357592	0.0685639	0.435978	0.0489226	-0.407698	0.0879252	0.0551379	0.185915	0.511633	-0.229346	0.106647	0.0894441	0.198189	0.139902	-0.203756	0.0563203	-0.0175676	0.0592586	0.154241	-0.138815	0.0937227	0.0808436	0.0483387	0.0373966	0.0548661	0.054307	0.148739	0.129278	0.339011	91	0.322223	-0.498391	-3.93118	-1.24051	7.292	-0.525326	-0.767701	1.06736	-0.312565	-0.213993	-0.107146	-10.5531	-0.51915	19.7511	0.0801027
92	-0.00695803	0.235686	0.54725	0.180335	0.346034	0.0905926	0.426166	0.0209505	-0.369608	0.0934768	0.0572205	0.188572	0.52302	-0.246557	0.0909367	0.0871993	0.221843	0.105846	-0.204932	0.0349369	-0.0161434	0.0605043	0.148659	-0.134098	0.0644553	0.0719368	0.0334485	0.0473139	0.0394006	0.0524016	0.142784	0.137983	0.257405	92	0.3022	-0.51892	-3.3128	-1.1847	5.25	-0.281578	-0.786805	1.12973	-1.02456	-0.177694	-0.0662336	-11.1125	-0.578463	19.924	0.0486532
93	-0.0100226	0.281388	0.572428	0.179724	0.336755	0.104324	0.418611	-0.00284072	-0.339749	0.0957763	0.0538942	0.197183	0.528755	-0.238837	0.0633437	0.0885535	0.23663	0.0322616	-0.208514	0.0296455	-0.0235679	0.0550198	0.13989	-0.121984	0.0541368	0.0636899	0.0493214	0.0475034	0.0211168	0.0393526	0.139697	0.142281	0.163993	93	0.237648	-0.503854	-2.70819	-1.21868	3.70725	-0.134537	-0.58999	1.15862	-1.70677	-0.13051	-0.0603784	-11.6471	-0.543409	19.8115	0.0164212
94	-0.0121654	0.354887	0.589149	0.170145	0.346029	0.110798	0.408536	-0.0230036	-0.301436	0.095951	0.048623	0.213427	0.528458	-0.196999	0.039587	0.0941249	0.245401	-0.0380273	-0.200855	0.00647451	-0.0298775	0.0582332	0.121427	-0.108929	0.0847314	0.0432369	0.057709	0.0425465	-0.00028057	0.0218928	0.14933	0.146289	0.0622253	94	0.177072	-0.501197	-2.14061	-1.19629	2.41632	-0.0125871	-0.327785	1.12144	-1.88128	-0.115142	-0.0589985	-12.2551	-0.433286	18.9025	-0.014206
95	-0.0145112	0.39901	0.586755	0.160931	0.363377	0.121609	0.394885	-0.0391384	-0.29814	0.0964751	0.0434781	0.218419	0.505111	-0.119332	0.0365436	0.102682	0.250036	-0.0686399	-0.192807	-0.00872465	-0.0253547	0.0506901	0.0975563	-0.0893208	0.111777	0.0277511	0.0698797	0.0341383	-0.0258635	0.00367154	0.180268	0.149939	0.0106402	95	0.176878	-0.581897	-1.53033	-1.10384	0.221693	0.0741222	-0.203928	1.1499	-1.69698	-0.107313	-0.0389578	-12.9393	-0.320386	17.5279	-0.0408726
96	-0.016432	0.379115	0.582627	0.163594	0.38451	0.128644	0.389909	-0.0517737	-0.230401	0.0910275	0.0420426	0.208819	0.473355	-0.0581133	0.0370871	0.109411	0.250379	-0.111717	-0.180013	-0.0222907	-0.0109436	0.0246792	0.0805944	-0.0614363	0.132465	0.0123391	0.0609238	0.0298427	-0.0376883	-0.00589638	0.18884	0.15064	-0.0279298	96	0.184651	-0.687064	-1.06823	-1.14083	-1.5915	0.23256	-0.235758	1.17064	-1.03917	-0.133826	-0.0243486	-13.6767	-0.278149	15.2271	-0.0614979
97	-0.0181361	0.309728	0.56102	0.16317	0.396908	0.144251	0.384866	-0.060563	-0.190439	0.0873751	0.0398775	0.198636	0.445356	0.00560248	0.0387206	0.10827	0.248671	-0.087688	-0.163378	-0.0362076	0.00673214	0.0230648	0.0740853	-0.0442548	0.144003	0.00393051	0.0590158	0.0307343	-0.0401625	-0.0204202	0.189706	0.162932	-0.0564802	97	0.187514	-0.730839	-0.72052	-1.24269	-2.65135	0.289991	-0.280427	1.13875	-0.81141	-0.161429	-0.0165081	-14.1819	-0.313929	13.2744	-0.0848871
98	-0.0183694	0.261406	0.492226	0.158536	0.410054	0.150187	0.382962	-0.0659526	-0.0978392	0.0868766	0.0361839	0.197686	0.417473	0.048537	0.043758	0.112649	0.243619	-0.0326807	-0.112123	-0.0044594	0.0245325	0.0242152	0.0609161	-0.0345156	0.15455	0.00365967	0.0616963	0.032967	-0.0427108	-0.042435	0.14334	0.173772	-0.0392135	98	0.162948	-0.745377	-0.489753	-1.20356	-2.83677	0.349022	-0.286532	1.03049	-0.503457	-0.180408	-0.0307981	-14.3303	-0.356647	11.29	-0.0882659
99	-0.0177956	0.241463	0.368457	0.138597	0.413923	0.151945	0.378576	-0.0692719	0.0600517	0.0856937	0.0352104	0.203918	0.390258	0.0565308	0.045319	0.125937	0.235701	0.038151	-0.0766856	0.0397906	0.0291722	0.0283281	0.0442236	-0.0254303	0.13802	-0.000840542	0.0845003	0.035619	-0.0480227	-0.0653326	0.113281	0.176125	0.0019529	99	0.129936	-0.734034	-0.47838	-1.16842	-2.35759	0.415784	-0.466992	0.919719	-0.971595	-0.246881	-0.0318297	-14.1976	-0.369302	9.60986	-0.0790202
100	-0.0144293	0.216476	0.241484	0.130572	0.400119	0.170284	0.377246	-0.0700843	0.195513	0.0837984	0.0445565	0.217355	0.366308	0.0497466	0.0380742	0.139018	0.226337	0.0922069	-0.080247	0.0882846	0.030723	0.042135	0.016305	-0.0297619	0.0822813	-0.0106214	0.109794	0.0345851	-0.0554616	-0.0953327	0.120314	0.156503	0.0740835	100	0.102571	-0.68728	-0.710333	-1.29197	-1.88465	0.445228	-0.594372	0.754473	-1.9406	-0.370957	-0.0268199	-14.1339	-0.361473	8.5383	-0.0593957
[truncated: 51 more columns]
